# Supplementary material for: Genome-Wide CRISPR Screening Identifies DCK and CCNL1 as Genes That Contribute to Gemcitabine Resistance in Pancreatic Cancer
Source: MDPI journal article supplement (doi:10.3390/cancers14133152), 2022-06-27
Supplement: s1 [file s1]

**Table S2.** Quantification of WB data. Intensity of bands as relative light units. No.: Arbitrarily assigned number of the Western blots used for analysis. .

| CAS9    | TB32047-WT | TB32047-CAS9  | TB32047-NC-SC        | TB32047-DCK-KO-SC    |
|---------|------------|---------------|----------------------|----------------------|
| No. 1   | 0,00983    | 1,042459      | 0,010451             | 0,003478             |
| No. 2   | 0,004421   | 1,275084      | 0,009218             | 0,003601             |
| No. 3   | 0,008476   | 1,186867      | 0,039981             | 0,004309             |
| DCK     | TB32047-WT | TB32047-CAS9  | TB32047-NC-SC        | TB32047-DCK-KO-SC    |
| No. 1   | 1,045699   | 0,955817      | 1,083641             | 0,001901             |
| No. 2   | 1,129337   | 1,391768      | 1,316326             | 0,005466             |
| No. 3   | 1,54556    | 1,239821      | 0,979504             | 0,030932             |
| CAS9    | PANC1-WT   | PANC1-CAS9    | PANC1-NC             | PANC1-DCK-KO         |
| No. 1   | 0,008865   | 1,192953      | 1,13576              | 0,945673             |
| No. 2   | 0,012327   | 1,083415      | 1,16051              | 1,368772             |
| No. 3   | 0,00765    | 1,180473      | 1,03543              | 1,13165              |
| DCK     | PANC1-WT   | PANC1-CAS9    | PANC1-NC             | PANC1-DCK-KO         |
| No. 1   | 1,029258   | 1,427191      | 1,238973             | 0,010873             |
| No. 2   | 1,238103   | 1,471721      | 0,91272              | 0,02302              |
| No. 3   | 1,261114   | 1,069495      | 0,673947             | 0,003354             |
| STAT3   | TB32047-WT | TB32047-NC-SC | TB32047-CCNL1-SG1-SC | TB32047-CCNL1-SG2-SC |
| No. 1   | 0,756029   | 1,081582      | 1,291026             | 1,109283             |
| No. 2   | 1,020306   | 1,348033      | 0,8987               | 0,828383             |
| No. 3   | 0,591612   | 0,705559      | 0,747677             | 1,031253             |
| P-STAT3 | TB32047-WT | TB32047-NC-SC | TB32047-CCNL1-SG1-SC | TB32047-CCNL1-SG2-SC |
| No. 1   | 0,354066   | 0,47775       | 1,033604             | 0,991921             |
| No. 2   | 0,50051    | 0,620335      | 1,43211              | 0,979588             |
| No. 3   | 0,266855   | 0,36338       | 1,213576             | 0,803833             |
| AKT     | TB32047-WT | TB32047-NC-SC | TB32047-CCNL1-SG1-SC | TB32047-CCNL1-SG2-SC |
| No. 1   | 0,776362   | 0,606362      | 1,000661             | 0,959757             |
| No. 2   | 1,436468   | 0,658487      | 1,332361             | 0,849343             |
| No. 3   | 0,979549   | 0,668946      | 1,389699             | 0,920197             |
| P-AKT   | TB32047-WT | TB32047-NC-SC | TB32047-CCNL1-SG1-SC | TB32047-CCNL1-SG2-SC |
| No. 1   | 0,679691   | 0,147145      | 1,29252              | 1,258378             |
| No. 2   | 0,413553   | 0,339532      | 1,037996             | 1,114887             |
| No. 3   | 0,27963    | 0,156495      | 1,056761             | 0,684011             |
| ERK     | TB32047-WT | TB32047-NC-SC | TB32047-CCNL1-SG1-SC | TB32047-CCNL1-SG2-SC |
| No. 1   | 0,748531   | 0,731382      | 1,188474             | 0,983086             |
| No. 2   | 0,809349   | 0,577329      | 0,989491             | 0,693631             |
| No. 3   | 0,549911   | 0,795382      | 0,799871             | 0,556347             |
| P-ERK   | TB32047-WT | TB32047-NC-SC | TB32047-CCNL1-SG1-SC | TB32047-CCNL1-SG2-SC |
| No. 1   | 0,329998   | 0,290356      | 1,326615             | 0,972017             |
| No. 2   | 0,281148   | 0,255843      | 0,797946             | 1,091565             |
| No. 3   | 0,313414   | 0,086834      | 0,683238             | 0,984748             |
| STAT3   | PANC1-WT   | PANC1-NC-SC   | PANC1-CCNL1-SG1-SC   | PANC1-CCNL1-SG2-SC   |
| No. 1   | 0,962239   | 0,951234      | 1,060122             | 1,136721             |
| No. 2   | 1,153772   | 1,039694      | 0,970515             | 0,795047             |
| No. 3   | 1,31628    | 0,962304      | 1,104736             | 1,097922             |
| P-STAT3 | PANC1-WT   | PANC1-NC-SC   | PANC1-CCNL1-SG1-SC   | PANC1-CCNL1-SG2-SC   |
| No. 1   | 0,736209   | 0,808726      | 1,136678             | 1,278955             |
| No. 2   | 0,690895   | 0,729181      | 0,978325             | 0,878905             |
| No. 3   | 0,67754    | 0,846206      | 0,945614             | 1,04538              |
| AKT     | PANC1-WT   | PANC1-NC-SC   | PANC1-CCNL1-SG1-SC   | PANC1-CCNL1-SG2-SC   |
| No. 1   | 0,813737   | 0,841157      | 0,834016             | 1,006746             |
| No. 2   | 0,704142   | 0,985394      | 0,871826             | 0,971626             |
| No. 3   | 0,87905    | 0,919118      | 1,0315               | 1,320173             |
| P-AKT   | PANC1-WT   | PANC1-NC-SC   | PANC1-CCNL1-SG1-SC   | PANC1-CCNL1-SG2-SC   |
| No. 1   | 0,300253   | 0,380862      | 1,211282             | 0,597457             |
| No. 2   | 0,575888   | 0,531696      | 0,978595             | 0,942167             |
| No. 3   | 0,293938   | 0,358224      | 0,963987             | 1,193162             |
| ERK     | PANC1-WT   | PANC1-NC-SC   | PANC1-CCNL1-SG1-SC   | PANC1-CCNL1-SG2-SC   |
| No. 1   | 0,914579   | 0,855221      | 0,899002             | 0,789124             |
| No. 2   | 0,805783   | 0,743637      | 0,952951             | 1,040967             |

|       |          |             |                    |                    |
|-------|----------|-------------|--------------------|--------------------|
| No. 3 | 1,243113 | 1,030997    | 1,137792           | 1,032207           |
| P-ERK | PANC1-WT | PANC1-NC-SC | PANC1-CCNL1-SG1-SC | PANC1-CCNL1-SG2-SC |
| No. 1 | 0,487105 | 0,250575    | 0,685968           | 1,116594           |
| No. 2 | 0,32009  | 0,383145    | 0,939275           | 1,097394           |
| No. 3 | 0,521789 | 0,62507     | 0,88506            | 0,877128           |
