# Supplementary material for: Genome-Wide CRISPR Screening Identifies DCK and CCNL1 as Genes That Contribute to Gemcitabine Resistance in Pancreatic Cancer
Source: Cancers (Basel). 2022 Jun 27;14(13):3152. doi: 10.3390/cancers14133152 (PMC9264918; doi:10.3390/cancers14133152)
Supplement: Supplementary file 1 [file cancers-14-03152-s001.zip › Table-S1.xlsx]

## Sheet: Sheet1
id	num	neg|score	neg|p-value	neg|fdr	neg|rank	neg|goodsgrna	neg|lfc	pos|score	pos|p-value	pos|fdr	pos|rank	pos|goodsgrna	pos|lfc
Dck	6	0.81275	0.90798	0.999991	20037	2	3.705	3.093e-12	2.1995e-07	0.00165	1	4	3.705
Ccnl1	6	0.67345	0.84973	0.999991	18407	1	1.6041	1.7911e-08	2.1995e-07	0.00165	2	4	1.6041
Gpi1	6	0.99981	0.99979	0.999991	22499	0	1.75	1.0568e-07	2.1995e-07	0.00165	3	4	1.75
Tceanc2	4	0.99143	0.9914	0.999991	22292	0	0.84199	1.0098e-05	2.4855e-05	0.139851	4	3	0.84199
Olfr616	6	0.91178	0.95304	0.999991	21088	1	-1.5737	2.4775e-05	7.6324e-05	0.343564	5	2	-1.5737
Mmp15	6	0.94568	0.96272	0.999991	21434	1	-1.694	3.0144e-05	9.348e-05	0.35066	6	3	-1.694
Sohlh2	5	0.99646	0.99646	0.999991	22423	0	0.66994	4.1667e-05	0.00011108	0.357143	7	3	0.66994
Katna1	6	0.46612	0.70699	0.999991	15269	2	-2.7606	7.6384e-05	0.00022633	0.512376	8	3	-2.7606
Ccnt1	6	0.99587	0.99584	0.999991	22405	0	-0.98861	7.7215e-05	0.00022765	0.512376	9	3	-0.98861
Olfr1198	4	0.27124	0.48134	0.999991	11298	1	-1.7187	0.00010235	0.00022281	0.512376	10	2	-1.7187
Olfr612	6	0.78693	0.8961	0.999991	19708	2	-4.2427	0.00010827	0.00033323	0.644802	11	2	-4.2427
Ngb	6	0.68212	0.85302	0.999991	18495	2	-6.7459	0.00012387	0.00036666	0.644802	12	1	-6.7459
Fzd6	6	0.37884	0.64268	0.999991	13743	2	-4.4938	0.00012756	0.00037546	0.644802	13	2	-4.4938
Psd4	6	0.019473	0.078668	0.988598	1692	3	-5.2198	0.00016589	0.00046652	0.644802	14	2	-5.2198
Trim12a	6	0.9704	0.97379	0.999991	21800	1	-3.2279	0.00018607	0.00051711	0.644802	15	2	-3.2279
4930402H24Rik	6	0.94782	0.96351	0.999991	21464	1	-1.9153	0.00020466	0.00054746	0.644802	16	2	-1.9153
Olfr572	6	0.7264	0.87032	0.999991	18989	2	-4.7745	0.00021754	0.00056594	0.644802	17	2	-4.7745
Olfr582	6	0.39935	0.65792	0.999991	14097	2	-2.4662	0.00022295	0.00057298	0.644802	18	1	-2.4662
Adamts13	6	0.036223	0.12653	0.998679	2706	4	-8.4671	0.00025952	0.00063897	0.663938	19	2	-8.4671
Gm11128	3	0.97555	0.97569	0.999991	21903	0	0.013895	0.00026011	0.00051095	0.644802	20	1	0.013895
Hk2	5	0.66441	0.81069	0.999991	18317	2	-5.3208	0.00026999	0.00057298	0.644802	21	2	-5.3208
Mpeg1	6	0.202	0.43737	0.999991	9326	4	-7.5201	0.00027249	0.00066404	0.663938	22	1	-7.5201
Il10rb	6	0.31596	0.58389	0.999991	12436	3	-4.3527	0.00029749	0.00070891	0.663938	23	2	-4.3527
Tmem182	6	0.9829	0.98291	0.999991	22064	1	-4.7929	0.00032879	0.00076698	0.663938	24	2	-4.7929
Smpd2	5	0.1954	0.41973	0.999991	9124	2	-2.0302	0.00033835	0.00071287	0.663938	25	2	-2.0302
Efcab12	6	0.13997	0.34851	0.999991	7416	4	-7.9172	0.00037156	0.00085232	0.680086	26	1	-7.9172
mmu-mir-129-1	4	0.99762	0.99763	0.999991	22447	0	-0.22888	0.00037974	0.00076522	0.663938	27	2	-0.22888
Acp1	6	0.99634	0.99631	0.999991	22419	0	-1.8953	0.0004211	0.00094602	0.680086	28	1	-1.8953
Sirt1	6	0.77717	0.89179	0.999991	19568	2	-4.7451	0.00043719	0.00097022	0.680086	29	2	-4.7451
Prelid1	6	0.32747	0.5976	0.999991	12706	1	-5.3661	0.00047063	0.0010287	0.680086	30	1	-5.3661
Pfkfb3	6	0.60519	0.8075	0.999991	17457	1	-4.1122	0.00051837	0.0011176	0.680086	31	2	-4.1122
Coro6	6	0.84707	0.92491	0.999991	20368	2	-5.0471	0.00052556	0.0011356	0.680086	32	2	-5.0471
Kcnk1	6	0.096002	0.27256	0.999991	5761	3	-7.2364	0.00054449	0.0011739	0.680086	33	2	-7.2364
Kctd2	6	0.60094	0.80443	0.999991	17404	2	-3.8439	0.00054743	0.0011787	0.680086	34	2	-3.8439
Tmem120a	6	0.98537	0.98532	0.999991	22126	0	-3.6794	0.00056968	0.0012183	0.680086	35	1	-3.6794
Slc39a13	6	0.071362	0.21574	0.999991	4612	2	-4.3481	0.00059401	0.0012641	0.680086	36	2	-4.3481
Htr2a	6	0.32645	0.59639	0.999991	12677	4	-7.6252	0.00059862	0.0012724	0.680086	37	2	-7.6252
Upf3b	6	0.15672	0.37321	0.999991	7946	4	-7.8167	0.00061879	0.0013081	0.680086	38	2	-7.8167
Gpatch2	6	0.27207	0.52974	0.999991	11314	4	-6.7075	0.00061921	0.0013081	0.680086	39	1	-6.7075
Pak2	5	0.063991	0.18281	0.999991	4205	1	-0.83866	0.0006347	0.0012931	0.680086	40	2	-0.83866
mmu-mir-672	4	0.63925	0.77563	0.999991	17967	2	-7.2145	0.00064399	0.0012663	0.680086	41	1	-7.2145
Creb3l1	6	0.87862	0.94167	0.999991	20774	1	-2.8858	0.0006601	0.0013762	0.680086	42	2	-2.8858
Tpgs2	6	0.64917	0.83843	0.999991	18116	2	-6.1765	0.00066873	0.0013925	0.680086	43	1	-6.1765
Npr1	6	0.82807	0.91533	0.999991	20175	2	-0.98606	0.00067471	0.0014044	0.680086	44	2	-0.98606
Camkv	5	0.70062	0.83155	0.999991	18693	2	-2.6631	0.00067546	0.001374	0.680086	45	2	-2.6631
Tgfbr3	5	0.53551	0.74144	0.999991	16425	2	-4.317	0.00068112	0.0013811	0.680086	46	1	-4.317
Lrrn4	6	0.45131	0.69624	0.999991	15021	3	-4.0652	0.00068453	0.0014216	0.680086	47	2	-4.0652
Cog5	6	0.84626	0.9245	0.999991	20360	2	-6.6751	0.00071825	0.0014875	0.680086	48	1	-6.6751
Plaa	5	0.74277	0.85671	0.999991	19167	1	-6.2115	0.00073545	0.0014827	0.680086	49	2	-6.2115
Asprv1	6	0.24732	0.49794	0.999991	10634	3	-6.6809	0.00076777	0.0015874	0.680086	50	1	-6.6809
S100a6	5	0.99459	0.99458	0.999991	22373	0	-0.58901	0.00077208	0.0015513	0.680086	51	2	-0.58901
A2m	6	0.82502	0.91385	0.999991	20145	2	-4.3817	0.00079721	0.0016521	0.688577	52	2	-4.3817
Akr1c20	5	0.79115	0.8874	0.999991	19762	2	-3.2655	0.00080085	0.0016015	0.680086	53	2	-3.2655
Igfbpl1	4	0.25159	0.45549	0.999991	10767	3	-7.8521	0.00080906	0.0015817	0.680086	54	1	-7.8521
Celsr3	4	0.94654	0.94651	0.999991	21447	0	-2.8958	0.00087056	0.0017	0.689975	55	2	-2.8958
Egr1	6	0.86154	0.93245	0.999991	20533	2	-4.2999	0.00089377	0.0018522	0.706578	56	2	-4.2999
mmu-mir-6995	4	0.27371	0.48456	0.999991	11347	2	-5.1448	0.0009081	0.0017717	0.699583	57	1	-5.1448
Hist3h2a	6	0.25047	0.50203	0.999991	10727	3	-6.4588	0.00091632	0.0018967	0.711469	58	1	-6.4588
Neurog2	5	0.99796	0.99797	0.999991	22456	0	-2.6057	0.00093514	0.0018478	0.706578	59	2	-2.6057
Fam46c	6	0.038727	0.13328	0.998679	2842	2	-4.4842	0.0010153	0.0020792	0.74281	60	1	-4.4842
Fpr-rs3	6	0.71973	0.86764	0.999991	18915	1	-6.2248	0.0010356	0.0021171	0.744508	61	2	-6.2248
Gm13119	6	0.069429	0.21108	0.999991	4497	4	-8.1431	0.0010648	0.0021738	0.747827	62	1	-8.1431
Ubxn1	6	0.23163	0.47744	0.999991	10180	2	-5.6843	0.0010927	0.0022257	0.747827	63	2	-5.6843
Syt15	6	0.30428	0.56976	0.999991	12144	3	-7.5143	0.0011143	0.0022609	0.747827	64	1	-7.5143
Rps6kb2	6	0.42815	0.67923	0.999991	14610	3	-4.473	0.0011302	0.0022904	0.747827	65	2	-4.473
Slc22a1	6	0.074499	0.22321	0.999991	4762	4	-6.953	0.0011638	0.0023528	0.747827	66	1	-6.953
mmu-mir-16-1	4	0.064714	0.17916	0.999991	4243	2	-3.4826	0.0012052	0.0023533	0.747827	67	1	-3.4826
Olfr24	5	0.088894	0.23402	0.999991	5455	3	-8.3175	0.0012175	0.0023872	0.747827	68	1	-8.3175
Kirrel3	6	0.17609	0.40105	0.999991	8563	4	-5.3407	0.0012628	0.0025473	0.747827	69	1	-5.3407
Tenm1	6	0.11779	0.31476	0.999991	6657	2	-5.6329	0.0012797	0.0025759	0.747827	70	2	-5.6329
Npm1	5	0.15677	0.35958	0.999991	7948	3	-7.3707	0.0013	0.002546	0.747827	71	1	-7.3707
mmu-mir-7652	4	0.17481	0.34949	0.999991	8520	3	-7.8903	0.0013042	0.0025424	0.747827	72	1	-7.8903
Idh1	6	0.46869	0.70882	0.999991	15315	3	-7.4277	0.0013123	0.0026388	0.747827	73	1	-7.4277
Gm1527	5	0.23341	0.46065	0.999991	10238	2	-5.3486	0.0013162	0.0025798	0.747827	74	2	-5.3486
Rbbp5	5	0.18236	0.40271	0.999991	8753	2	-5.554	0.0013412	0.0026247	0.747827	75	1	-5.554
Kcnmb3	6	0.53411	0.7564	0.999991	16406	2	-4.9459	0.0013635	0.0027246	0.747827	76	2	-4.9459
Catsper2	5	0.2373	0.46482	0.999991	10340	3	-7.8981	0.0013648	0.002663	0.747827	77	2	-7.8981
Cct7	5	0.13874	0.32781	0.999991	7364	2	-5.376	0.0013825	0.0026999	0.747827	78	1	-5.376
Atp5s	6	0.15949	0.37725	0.999991	8033	4	-7.8752	0.0014113	0.0028134	0.75884	79	1	-7.8752
NonTargetingControlGuideForMouse_0948	2	0.044404	0.079875	0.989994	3176	1	-3.0213	0.0014117	0.0017167	0.689975	80	1	-3.0213
mmu-mir-7654	3	0.86416	0.86448	0.999991	20571	1	-5.9494	0.0014239	0.0024158	0.747827	81	1	-5.9494
9130023H24Rik	6	0.27549	0.53405	0.999991	11396	3	-5.2819	0.0014476	0.0028882	0.75884	82	2	-5.2819
4931431F19Rik	6	0.59891	0.80301	0.999991	17372	1	-5.515	0.0014595	0.0029076	0.75884	83	2	-5.515
Gm10639	5	0.73637	0.85283	0.999991	19103	2	-6.9377	0.001465	0.002864	0.75884	84	1	-6.9377
Olfr597	6	0.9959	0.99587	0.999991	22406	0	-5.8905	0.0015103	0.0030017	0.75884	85	1	-5.8905
Olfm4	6	0.96419	0.9705	0.999991	21689	1	-3.5075	0.001522	0.0030233	0.75884	86	2	-3.5075
Fpgt	6	0.61747	0.81618	0.999991	17660	3	-7.1433	0.001539	0.0030633	0.75884	87	2	-7.1433
Guca1a	5	0.96237	0.96303	0.999991	21652	1	-3.4554	0.0015736	0.003058	0.75884	88	2	-3.4554
Cd82	5	0.70981	0.83699	0.999991	18782	1	-4.5302	0.0015777	0.0030681	0.75884	89	2	-4.5302
Gan	6	0.040015	0.13673	0.998679	2927	2	-5.376	0.0015808	0.003153	0.771362	90	2	-5.376
Tex10	6	0.39742	0.65647	0.999991	14057	3	-6.4107	0.0016056	0.0032058	0.775844	91	2	-6.4107
Gm4302	2	0.12757	0.21231	0.999991	6993	1	-3.239	0.0016427	0.0019424	0.716686	92	1	-3.239
Tpm3	6	0.4064	0.66313	0.999991	14222	3	-5.4581	0.0016685	0.003336	0.798768	93	2	-5.4581
NonTargetingControlGuideForMouse_0117	2	0.891	0.89091	0.999991	20932	0	-1.5725	0.0016757	0.0019794	0.71854	94	1	-1.5725
Nab1	6	0.42562	0.67742	0.999991	14568	2	-6.8162	0.0016991	0.0033989	0.800072	95	2	-6.8162
1700015E13Rik	6	0.57867	0.78847	0.999991	17054	2	-7.0975	0.0017082	0.0034126	0.800072	96	1	-7.0975
1700029I15Rik	6	0.99989	0.99989	0.999991	22503	0	-5.0294	0.0017585	0.0035102	0.806173	97	2	-5.0294
Slc2a1	5	0.88871	0.92368	0.999991	20911	1	0.25163	0.0017776	0.0034583	0.80244	98	2	0.25163
Ndufa7	6	0.35232	0.62302	0.999991	13273	2	-3.8238	0.0017846	0.0035551	0.808231	99	2	-3.8238
Bcl2l15	6	0.9986	0.99858	0.999991	22474	0	-2.0277	0.0018242	0.0036356	0.818081	100	2	-2.0277
9330182O14Rik	6	0.11283	0.30707	0.999991	6492	4	-7.94	0.0018567	0.0036998	0.818081	101	1	-7.94
Slc18b1	6	0.16903	0.39106	0.999991	8350	3	-4.5448	0.0018776	0.0037408	0.818081	102	2	-4.5448
Olfr710	6	0.65616	0.84323	0.999991	18221	3	-7.2592	0.0019061	0.0038045	0.818186	103	2	-7.2592
Msi1	6	0.056095	0.17832	0.999991	3788	2	-5.4292	0.0019154	0.0038199	0.818186	104	2	-5.4292
mmu-mir-7228	4	0.72801	0.82623	0.999991	19005	1	-2.2745	0.0019302	0.0037438	0.818081	105	2	-2.2745
Il20rb	6	0.059301	0.1864	0.999991	3947	2	-4.8873	0.0019317	0.0038534	0.818186	106	2	-4.8873
Tmem127	6	0.59721	0.8018	0.999991	17341	2	-6.5371	0.0020051	0.0039972	0.837759	107	1	-6.5371
Ren1	6	0.0070132	0.032399	0.936139	723	4	-3.4177	0.0020545	0.0040944	0.837759	108	1	-3.4177
Tspan11	5	0.77307	0.87575	0.999991	19521	2	-2.9426	0.0020835	0.0040359	0.837759	109	1	-2.9426
Igfbp3	5	0.35873	0.58943	0.999991	13380	2	-6.9558	0.0021015	0.0040702	0.837759	110	2	-6.9558
Sar1b	6	0.0097235	0.043843	0.966114	951	2	-4.7738	0.002104	0.0041886	0.841717	111	1	-4.7738
Tmem215	5	0.24381	0.47165	0.999991	10525	1	-5.0525	0.0021529	0.004178	0.841717	112	2	-5.0525
Fpr-rs4	6	0.62053	0.81829	0.999991	17706	3	-6.5669	0.0021535	0.0042854	0.853544	113	1	-6.5669
Ntan1	6	0.4136	0.66844	0.999991	14340	2	-3.9151	0.0022029	0.0043777	0.864296	114	1	-3.9151
Rapgefl1	6	0.76761	0.88761	0.999991	19464	2	-5.7507	0.0022487	0.0044657	0.867489	115	2	-5.7507
Hexdc	6	0.10924	0.3014	0.999991	6360	2	-3.4951	0.0022524	0.004471	0.867489	116	1	-3.4951
Slc4a8	6	0.63909	0.83135	0.999991	17963	2	-6.8771	0.0023513	0.0046527	0.889453	117	1	-6.8771
Gpx3	6	0.78866	0.89686	0.999991	19728	1	-6.9322	0.0024007	0.0047495	0.8908	118	1	-6.9322
Serpina3g	5	0.040894	0.13237	0.998679	2989	1	-6.2155	0.0024132	0.0046632	0.889453	119	1	-6.2155
Dhodh	6	0.44556	0.692	0.999991	14911	2	-4.8069	0.0024502	0.0048502	0.902177	120	1	-4.8069
Olfr1337	5	0.11649	0.2872	0.999991	6616	3	-8.2189	0.0024544	0.0047446	0.8908	121	1	-8.2189
Tmco6	6	0.4294	0.68011	0.999991	14644	3	-4.0203	0.0025491	0.0050402	0.929606	122	1	-4.0203
1700017N19Rik	6	0.99388	0.99381	0.999991	22360	0	-2.0587	0.00257	0.0050803	0.929606	123	2	-2.0587
Cyp1a1	6	0.51082	0.73954	0.999991	16051	1	-5.517	0.0026329	0.005203	0.936832	124	2	-5.517
Pde1b	5	0.89634	0.92652	0.999991	20972	1	-0.29626	0.0026872	0.0051788	0.936832	125	2	-0.29626
Ifitm6	6	0.089451	0.2577	0.999991	5477	3	-5.1	0.0026974	0.0053328	0.940456	126	1	-5.1
Etfdh	6	0.35262	0.62324	0.999991	13276	1	-4.6458	0.0027468	0.0054282	0.940456	127	1	-4.6458
Il17re	6	0.13251	0.33728	0.999991	7140	3	-7.7991	0.0027963	0.0055123	0.940456	128	1	-7.7991
Slc37a4	5	0.73147	0.84981	0.999991	19040	1	-0.2489	0.0028009	0.0053842	0.940456	129	2	-0.2489
2310057J18Rik	5	0.12453	0.30197	0.999991	6914	1	-6.9467	0.0029076	0.0055936	0.940456	130	1	-6.9467
5530400C23Rik	6	0.31962	0.58828	0.999991	12518	3	-6.1724	0.0029086	0.0057058	0.940456	131	2	-6.1724
Msl3	5	0.29849	0.52877	0.999991	11997	2	-7.0742	0.00299	0.0057454	0.940456	132	1	-7.0742
Dnah8	6	0.55313	0.77008	0.999991	16675	3	-7.2885	0.002994	0.0058664	0.940456	133	1	-7.2885
Olfr498	6	0.59629	0.80115	0.999991	17331	1	-1.1392	0.0029989	0.0058752	0.940456	134	2	-1.1392
9130019O22Rik	6	0.51122	0.73981	0.999991	16056	3	-6.8182	0.0030259	0.0059249	0.940456	135	2	-6.8182
Rsbn1	6	0.95114	0.96476	0.999991	21498	1	-0.97554	0.0030434	0.005961	0.940456	136	1	-0.97554
Lama1	6	0.36099	0.62941	0.999991	13415	3	-7.0816	0.0030735	0.0060261	0.940456	137	2	-7.0816
Olfr553	6	0.16866	0.3905	0.999991	8331	1	-3.7312	0.0030929	0.0060657	0.940456	138	1	-3.7312
Ghrh	6	0.17272	0.39631	0.999991	8465	3	-5.443	0.0031008	0.0060819	0.940456	139	2	-5.443
Samd7	6	0.35127	0.62226	0.999991	13254	3	-7.4163	0.0031423	0.0061532	0.940456	140	1	-7.4163
1810024B03Rik	6	0.6211	0.8187	0.999991	17712	2	-5.8202	0.0031801	0.0062192	0.940456	141	2	-5.8202
Trove2	6	0.54379	0.76336	0.999991	16539	3	-7.1713	0.0031917	0.0062377	0.940456	142	1	-7.1713
Dctpp1	5	0.99045	0.99048	0.999991	22263	0	-0.13019	0.0032067	0.006162	0.940456	143	2	-0.13019
Zkscan2	6	0.74132	0.87643	0.999991	19155	2	-5.8376	0.0032148	0.0062874	0.940456	144	2	-5.8376
Pin1rt1	6	0.38621	0.64813	0.999991	13863	2	-4.7265	0.0032253	0.0063076	0.940456	145	2	-4.7265
Igf2bp1	5	0.5088	0.72791	0.999991	16018	2	-2.9954	0.0032372	0.0062289	0.940456	146	1	-2.9954
Slc25a18	5	0.60992	0.78057	0.999991	17535	2	-5.9906	0.0032783	0.0063052	0.940456	147	1	-5.9906
BC049730	6	0.51239	0.74067	0.999991	16080	2	-4.7585	0.0032905	0.0064154	0.940456	148	1	-4.7585
Ifnar1	6	0.51168	0.74014	0.999991	16062	3	-7.0302	0.0033399	0.0065166	0.940456	149	1	-7.0302
Chil1	6	0.024933	0.09469	0.995842	2010	3	-7.8173	0.0033805	0.0065909	0.940456	150	2	-7.8173
Cfi	6	0.77038	0.88885	0.999991	19490	2	-4.4236	0.0033893	0.0066037	0.940456	151	1	-4.4236
Gm7157	6	0.14271	0.35266	0.999991	7524	3	-4.2424	0.0033948	0.0066147	0.940456	152	2	-4.2424
Tekt1	6	0.99162	0.99156	0.999991	22298	0	-3.617	0.003402	0.0066305	0.940456	153	2	-3.617
Ncdn	6	0.52788	0.75196	0.999991	16317	2	-3.4461	0.0034092	0.0066433	0.940456	154	2	-3.4461
Crb3	6	0.06951	0.21128	0.999991	4501	4	-8.0173	0.0034388	0.0067009	0.940456	155	1	-8.0173
Loxl2	6	0.48074	0.71769	0.999991	15571	3	-4.7578	0.0035066	0.0068311	0.940456	156	2	-4.7578
Psmb9	6	0.40678	0.66342	0.999991	14227	3	-5.7386	0.0035376	0.0068909	0.940456	157	1	-5.7386
Ctrl	6	0.033097	0.11789	0.995842	2547	2	-5.6672	0.003543	0.0069028	0.940456	158	2	-5.6672
Vill	6	0.77962	0.89287	0.999991	19599	2	-3.36	0.0035503	0.0069156	0.940456	159	2	-3.36
Olfr1384	6	0.89058	0.94845	0.999991	20930	2	-6.4277	0.0035576	0.006927	0.940456	160	2	-6.4277
Tfpi2	6	0.31636	0.58435	0.999991	12444	2	-3.1817	0.0036016	0.0070093	0.940456	161	2	-3.1817
Sertm1	6	0.33665	0.60836	0.999991	12931	4	-7.4014	0.00362	0.0070423	0.940456	162	2	-7.4014
Vmn2r123	6	0.089484	0.25778	0.999991	5482	4	-7.4175	0.0036364	0.0070744	0.940456	163	1	-7.4175
Syncrip	5	0.98707	0.98704	0.999991	22178	0	-0.58604	0.0036489	0.0068408	0.940456	164	1	-0.58604
Igdcc4	6	0.98526	0.98521	0.999991	22123	0	-4.8799	0.0036607	0.0071236	0.940456	165	2	-4.8799
Serpina10	6	0.030691	0.11109	0.995842	2402	3	-7.2918	0.0036858	0.0071716	0.940456	166	1	-7.2918
Ccdc176	6	0.75819	0.88346	0.999991	19353	2	-5.5246	0.0037352	0.0072688	0.940456	167	1	-5.5246
Il6st	6	0.85927	0.93125	0.999991	20502	1	-6.8107	0.0037614	0.0073176	0.940456	168	2	-6.8107
Olfr1066	6	0.48183	0.71845	0.999991	15590	2	-0.55927	0.0037652	0.007326	0.940456	169	2	-0.55927
Gcc2	5	0.23509	0.46245	0.999991	10286	3	-7.1331	0.0037724	0.0069565	0.940456	170	1	-7.1331
Chtf18	6	0.55932	0.77456	0.999991	16767	2	-3.1965	0.0037846	0.0073673	0.940456	171	1	-3.1965
Dytn	6	0.9198	0.95504	0.999991	21153	1	-0.56669	0.0037878	0.0073731	0.940456	172	2	-0.56669
Timp2	6	0.11953	0.31744	0.999991	6714	3	-5.3462	0.0038339	0.007454	0.940456	173	1	-5.3462
Itpkb	4	0.95497	0.95488	0.999991	21556	0	-3.9959	0.0039745	0.0058818	0.940456	174	1	-3.9959
Il21r	6	0.45354	0.69785	0.999991	15063	3	-7.5155	0.0039821	0.0077325	0.96504	175	1	-7.5155
Slc22a27	6	0.46518	0.70627	0.999991	15253	3	-6.7488	0.0040287	0.0078103	0.96504	176	2	-6.7488
Rgcc	6	0.99803	0.998	0.999991	22458	0	-5.6491	0.0040326	0.0078147	0.96504	177	2	-5.6491
1700012L04Rik	6	0.00067961	0.0035397	0.651208	108	2	-3.6241	0.0040809	0.0079005	0.96504	178	1	-3.6241
Cnbp	6	0.24207	0.49112	0.999991	10478	3	-7.4494	0.0041303	0.0079929	0.96504	179	1	-7.4494
Ptcra	6	0.44916	0.69469	0.999991	14971	3	-7.018	0.0041796	0.0080875	0.96504	180	1	-7.018
Hnrnpa0	6	0.78047	0.89324	0.999991	19614	2	-2.8382	0.0042568	0.0082274	0.96504	181	2	-2.8382
Tmem184c	5	0.36039	0.59113	0.999991	13403	2	-6.777	0.0042663	0.0074105	0.940456	182	1	-6.777
Thoc6	6	0.70716	0.86266	0.999991	18747	2	-4.3597	0.0042784	0.0082727	0.96504	183	1	-4.3597
Iqgap3	6	0.88934	0.94773	0.999991	20917	1	-2.3499	0.0043278	0.0083668	0.96504	184	1	-2.3499
Tbc1d16	6	0.2775	0.53661	0.999991	11458	3	-5.3872	0.0043449	0.0083936	0.96504	185	2	-5.3872
Smim9	6	0.36861	0.63511	0.999991	13540	3	-6.7468	0.0044265	0.008552	0.96504	186	1	-6.7468
Ogfod1	6	0.37759	0.64175	0.999991	13726	1	-3.6966	0.0044759	0.0086418	0.96504	187	1	-3.6966
Cdkn2b	6	0.05077	0.16476	0.999991	3492	2	-7.0581	0.004499	0.0086849	0.96504	188	2	-7.0581
Fus	6	0.73956	0.8757	0.999991	19132	2	-4.8505	0.0045318	0.0087456	0.96504	189	2	-4.8505
1700055N04Rik	6	0.20003	0.43466	0.999991	9269	3	-7.2064	0.0045729	0.0088164	0.96504	190	2	-7.2064
Fgd5	6	0.98123	0.98139	0.999991	22016	1	-6.6856	0.0045746	0.0088186	0.96504	191	1	-6.6856
Pcif1	6	0.57345	0.78472	0.999991	16985	3	-3.5499	0.0046239	0.0089097	0.96504	192	1	-3.5499
Gm20939	6	0.26173	0.51664	0.999991	11024	3	-7.7014	0.0046733	0.0090047	0.96504	193	1	-7.7014
Supt20	6	0.70324	0.86109	0.999991	18712	1	-1.8744	0.0046765	0.0090108	0.96504	194	2	-1.8744
Dram2	6	0.11107	0.30434	0.999991	6424	3	-7.6129	0.0047227	0.0091045	0.96504	195	1	-7.6129
Kctd9	6	0.21684	0.45772	0.999991	9754	2	-3.4666	0.004772	0.0091969	0.96504	196	1	-3.4666
Stpg2	6	0.33144	0.60227	0.999991	12813	3	-5.6941	0.0047981	0.0092391	0.96504	197	2	-5.6941
Pick1	6	0.18495	0.41364	0.999991	8839	4	-6.8874	0.0048214	0.0092862	0.96504	198	1	-6.8874
Alkbh8	6	0.99593	0.9959	0.999991	22408	0	-1.9788	0.0048234	0.0092915	0.96504	199	2	-1.9788
4930447C04Rik	6	0.31711	0.58526	0.999991	12461	2	-6.2514	0.0048707	0.0093733	0.96504	200	1	-6.2514
Klhdc8a	6	0.32801	0.59822	0.999991	12720	1	-2.9811	0.0049694	0.0095559	0.96504	201	1	-2.9811
L3mbtl4	6	0.36622	0.63333	0.999991	13500	2	-6.7335	0.0049939	0.0096003	0.96504	202	2	-6.7335
Lrrc23	6	0.1306	0.33437	0.999991	7078	3	-5.0827	0.0050681	0.0097288	0.96504	203	1	-5.0827
Gm514	5	0.4776	0.70287	0.999991	15519	2	-5.4269	0.0050891	0.0081953	0.96504	204	1	-5.4269
Ankrd36	6	0.28979	0.55199	0.999991	11781	3	-4.5304	0.0051668	0.0098761	0.96504	205	1	-4.5304
Ttbk2	6	0.20715	0.44447	0.999991	9465	4	-7.7615	0.0052161	0.0099206	0.96504	206	1	-7.7615
Cbln3	6	0.062851	0.19515	0.999991	4138	3	-6.4264	0.0052654	0.0099668	0.96504	207	1	-6.4264
4922501C03Rik	5	0.66684	0.81206	0.999991	18348	1	-1.526	0.0052947	0.0083994	0.96504	208	1	-1.526
Mageb18	6	0.02774	0.10279	0.995842	2195	2	-6.8562	0.0053148	0.010013	0.96504	209	1	-6.8562
Fbrs	6	0.76641	0.88708	0.999991	19448	2	-6.6774	0.0053641	0.010054	0.96504	210	1	-6.6774
Btnl2	5	0.36041	0.59114	0.999991	13405	2	-6.8171	0.0053769	0.00849	0.96504	211	1	-6.8171
Batf	6	0.011722	0.051853	0.979113	1099	5	-8.1417	0.0054134	0.010102	0.96504	212	1	-8.1417
Klk8	5	0.062586	0.17983	0.999991	4128	2	-3.4286	0.005418	0.0085283	0.96504	213	1	-3.4286
Api5	5	0.67314	0.81568	0.999991	18403	2	-4.089	0.0054591	0.0085652	0.96504	214	1	-4.089
Rell1	6	0.84338	0.92305	0.999991	20325	1	-6.2577	0.0054627	0.010153	0.96504	215	1	-6.2577
Vmn1r204	6	0.26925	0.5262	0.999991	11235	3	-7.2917	0.0055121	0.010201	0.96504	216	1	-7.2917
Nnt	6	0.0056514	0.02651	0.917125	608	4	-8.4307	0.0055614	0.010241	0.96504	217	1	-8.4307
NonTargetingControlGuideForMouse_0086	2	0.95373	0.9538	0.999991	21534	0	-0.39784	0.0055666	0.0058712	0.940456	218	1	-0.39784
Lyzl4	6	0.21663	0.45745	0.999991	9752	4	-7.7717	0.0056107	0.010287	0.96504	219	1	-7.7717
Fhl2	4	0.078399	0.20197	0.999991	4932	2	-7.3498	0.0056531	0.0074795	0.940456	220	1	-7.3498
Ppp1r27	6	0.95787	0.96757	0.999991	21590	1	-3.8603	0.00566	0.010331	0.96504	221	1	-3.8603
Lysmd1	6	0.13019	0.33371	0.999991	7067	4	-6.4173	0.0057093	0.010376	0.96504	222	1	-6.4173
Pkdcc	6	0.23105	0.47668	0.999991	10160	2	-6.6615	0.0057587	0.010427	0.965795	223	1	-6.6615
Psd	6	0.58791	0.79519	0.999991	17197	2	-6.5299	0.0058573	0.010521	0.97052	224	1	-6.5299
Myt1l	6	0.477	0.71491	0.999991	15503	1	-2.6207	0.0059066	0.010571	0.971085	225	1	-2.6207
Spty2d1	6	0.10923	0.30137	0.999991	6357	4	-7.9044	0.0060052	0.010654	0.972441	226	1	-7.9044
Cpsf7	5	0.9958	0.99578	0.999991	22402	0	-6.278	0.0060346	0.0091067	0.96504	227	1	-6.278
Ctag2	6	0.23193	0.47784	0.999991	10190	3	-7.2654	0.0060545	0.010698	0.972441	228	1	-7.2654
Cyp2d12	6	0.94586	0.96278	0.999991	21438	1	-2.5898	0.0061531	0.01079	0.972441	229	1	-2.5898
Wee2	6	0.63932	0.83149	0.999991	17971	3	-7.2134	0.0062024	0.010834	0.972441	230	1	-7.2134
Akap10	6	0.28506	0.54607	0.999991	11654	2	-2.6088	0.0062517	0.010888	0.972441	231	1	-2.6088
Hist2h2aa1	5	0.06626	0.18749	0.999991	4341	3	-6.4574	0.0062811	0.0093553	0.96504	232	1	-6.4574
Cant1	6	0.049132	0.16058	0.999991	3407	3	-5.5157	0.006301	0.010926	0.972441	233	1	-5.5157
Ace	6	0.035193	0.12369	0.998679	2663	5	-8.4863	0.0063995	0.011029	0.972441	234	1	-8.4863
Vat1	4	0.37704	0.57989	0.999991	13719	2	-4.3475	0.0064095	0.0082027	0.96504	235	1	-4.3475
Ubqln3	6	0.050453	0.16394	0.999991	3471	4	-8.2709	0.0065967	0.011213	0.972441	236	1	-8.2709
Phf11a	5	0.56651	0.75754	0.999991	16881	1	-2.175	0.0066097	0.0096707	0.96504	237	1	-2.175
Ubl4	6	0.63909	0.83135	0.999991	17964	2	-6.3752	0.0066459	0.01126	0.972441	238	1	-6.3752
Trappc8	5	0.97571	0.97576	0.999991	21905	0	-5.1264	0.0066508	0.0097107	0.96504	239	1	-5.1264
Dnajc15	5	0.3123	0.54296	0.999991	12341	2	-6.6769	0.0067329	0.0097846	0.96504	240	1	-6.6769
Dscr3	6	0.060207	0.18867	0.999991	3999	3	-5.9934	0.0067445	0.011347	0.972441	241	1	-5.9934
Relb	6	0.34309	0.61588	0.999991	13088	3	-7.4575	0.0067937	0.011389	0.972441	242	1	-7.4575
2210016F16Rik	6	0.8338	0.91817	0.999991	20233	1	-2.7186	0.006843	0.011436	0.972441	243	1	-2.7186
Trim29	5	0.24261	0.47036	0.999991	10497	3	-7.8854	0.0068561	0.0098946	0.96504	244	1	-7.8854
Tspan18	6	0.985	0.98495	0.999991	22114	0	-5.6125	0.0068923	0.011477	0.972441	245	1	-5.6125
Gm2897	1	0.99308	0.99305	0.999991	22341	0	0.70119	0.0069245	0.0068848	0.940456	246	1	0.70119
Hgd	4	0.021664	0.068814	0.979113	1811	3	-8.5498	0.0069353	0.0087011	0.96504	247	1	-8.5498
Kbtbd13	6	0.60867	0.80992	0.999991	17507	3	-6.7448	0.0069415	0.011519	0.972441	248	1	-6.7448
Arfip1	6	0.023901	0.091682	0.995842	1949	4	-4.1424	0.0069908	0.01156	0.972441	249	1	-4.1424
Fech	6	0.80082	0.90234	0.999991	19877	2	-4.0488	0.0070401	0.011602	0.972441	250	1	-4.0488
Tmem179b	6	0.50695	0.73676	0.999991	15990	3	-4.6432	0.0070893	0.011648	0.972441	251	1	-4.6432
Vmn2r49	1	0.99285	0.99282	0.999991	22336	0	1.5232	0.0071475	0.0071012	0.940456	252	1	1.5232
Sp7	5	0.078102	0.21216	0.999991	4917	4	-7.5397	0.0071846	0.01019	0.96504	253	1	-7.5397
Pofut2	6	0.40267	0.66036	0.999991	14159	3	-5.093	0.0071878	0.011741	0.972441	254	1	-5.093
Agrn	6	0.41403	0.66876	0.999991	14347	3	-6.5576	0.0073356	0.011876	0.972441	255	1	-6.5576
Cela3b	6	0.64751	0.83728	0.999991	18092	2	-5.6921	0.0073848	0.011925	0.972441	256	1	-5.6921
Tsc2	6	0.0095496	0.043123	0.962693	936	4	-5.5936	0.0074341	0.011969	0.972441	257	1	-5.5936
Pthlh	6	0.34257	0.61529	0.999991	13079	4	-7.5147	0.0074833	0.012015	0.972441	258	1	-7.5147
Pomk	4	0.082061	0.20791	0.999991	5107	2	-6.2254	0.0075267	0.0092515	0.96504	259	1	-6.2254
Itga3	6	0.2704	0.52766	0.999991	11271	4	-5.4124	0.0075818	0.012119	0.972441	260	1	-5.4124
mmu-let-7a-1	4	0.19978	0.38499	0.999991	9257	3	-7.9422	0.0075924	0.0093153	0.96504	261	1	-7.9422
Gpatch3	6	0.046969	0.15501	0.999991	3302	4	-8.2409	0.007631	0.012161	0.972441	262	1	-8.2409
Cntnap2	6	0.99618	0.99615	0.999991	22415	0	-6.2709	0.0076803	0.012208	0.972441	263	1	-6.2709
Zfp366	6	0.86887	0.93632	0.999991	20640	2	-5.4464	0.0077295	0.012248	0.972441	264	1	-5.4464
Rbm12b2	6	0.46156	0.70364	0.999991	15188	3	-4.9146	0.0078279	0.012347	0.975074	265	1	-4.9146
mmu-mir-7017	3	0.51078	0.65895	0.999991	16050	1	-7.0079	0.0078454	0.0086044	0.96504	266	1	-7.0079
Mettl21c	6	0.60597	0.80804	0.999991	17468	2	-4.6637	0.0080248	0.01251	0.975404	267	1	-4.6637
Rilpl2	6	0.80298	0.90334	0.999991	19900	1	-5.5027	0.0081233	0.012594	0.975404	268	1	-5.5027
Doc2b	6	0.99879	0.99878	0.999991	22478	0	-3.2013	0.0081725	0.012632	0.975404	269	1	-3.2013
Mettl20	6	0.30143	0.56633	0.999991	12081	1	-4.2467	0.0083201	0.012767	0.975404	270	1	-4.2467
Arpp21	6	0.09735	0.27555	0.999991	5827	3	-4.443	0.0083693	0.012805	0.975404	271	1	-4.443
Olfr707	5	0.7909	0.88724	0.999991	19757	1	-4.6675	0.0083746	0.011317	0.972441	272	1	-4.6675
Ndufs7	6	0.64198	0.83336	0.999991	18005	3	-5.9462	0.0084185	0.012848	0.975404	273	1	-5.9462
Sgta	5	0.9506	0.95388	0.999991	21490	1	-6.0461	0.0084566	0.011391	0.972441	274	1	-6.0461
Gm1045	5	0.87804	0.91996	0.999991	20768	1	-5.3967	0.0084976	0.011422	0.972441	275	1	-5.3967
Olfr1388	6	0.99095	0.99091	0.999991	22280	0	-3.1696	0.0085169	0.012948	0.975404	276	1	-3.1696
Rdh7	6	0.57022	0.78238	0.999991	16945	2	-5.9932	0.0085661	0.012997	0.975404	277	1	-5.9932
mmu-mir-880	4	0.19476	0.3779	0.999991	9112	2	-7.2379	0.0085774	0.010265	0.96504	278	1	-7.2379
H2afj	5	0.83928	0.90829	0.999991	20283	1	-5.772	0.0085796	0.011494	0.972441	279	1	-5.772
Emp3	6	0.061949	0.19294	0.999991	4091	3	-7.3744	0.0086645	0.013097	0.975404	280	1	-7.3744
mmu-mir-544	4	0.6125	0.7548	0.999991	17585	1	-7.161	0.0086758	0.010371	0.96504	281	1	-7.161
Hoxd11	6	0.71907	0.86738	0.999991	18907	1	-5.667	0.0087137	0.013148	0.975404	282	1	-5.667
Psrc1	6	0.25375	0.50633	0.999991	10832	4	-4.518	0.0087629	0.01319	0.975404	283	1	-4.518
Prkrip1	5	0.89956	0.92774	0.999991	20997	1	-3.6628	0.0087847	0.011682	0.972441	284	1	-3.6628
NonTargetingControlGuideForMouse_0093	2	0.97995	0.97993	0.999991	21986	0	-0.97306	0.0088086	0.0090487	0.96504	285	1	-0.97306
Epha10	6	0.93665	0.95976	0.999991	21324	1	-5.7646	0.0088121	0.013237	0.975404	286	1	-5.7646
Oog3	6	0.00052124	0.002758	0.646607	86	4	-9.042	0.0088612	0.013277	0.975404	287	1	-9.042
Aldh8a1	5	0.14509	0.33909	0.999991	7596	2	-2.8418	0.0089076	0.011806	0.972441	288	1	-2.8418
Aspg	5	0.22707	0.45391	0.999991	10033	2	-6.0729	0.0089486	0.011844	0.972441	289	1	-6.0729
Trmt6	6	0.18259	0.41033	0.999991	8759	4	-7.0896	0.0089596	0.013366	0.975404	290	1	-7.0896
Smco4	6	0.36329	0.63113	0.999991	13448	3	-6.9524	0.0090088	0.013414	0.975404	291	1	-6.9524
Fam228b	6	0.94619	0.96288	0.999991	21445	1	-4.7744	0.009058	0.013458	0.975404	292	1	-4.7744
Atg13	6	0.14043	0.34917	0.999991	7432	4	-6.1944	0.0091563	0.013551	0.975404	293	1	-6.1944
Srpk1	6	0.98073	0.98097	0.999991	22008	1	-6.2151	0.0092055	0.013589	0.975404	294	1	-6.2151
Krt26	6	0.28501	0.54603	0.999991	11652	4	-7.5602	0.0092546	0.013639	0.975404	295	1	-7.5602
Gfra3	6	0.056472	0.17927	0.999991	3804	2	-5.5515	0.0093038	0.013686	0.975404	296	1	-5.5515
Fev	5	0.80808	0.89867	0.999991	19973	2	-5.8338	0.0093175	0.012188	0.972441	297	1	-5.8338
NonTargetingControlGuideForMouse_0511	2	0.70925	0.7106	0.999991	18775	1	-3.0076	0.0093183	0.0095497	0.96504	298	1	-3.0076
Olfr1341	6	0.15401	0.36924	0.999991	7879	4	-6.8526	0.009353	0.013738	0.975404	299	1	-6.8526
Lgi1	6	0.18383	0.41207	0.999991	8807	3	-7.187	0.0095005	0.013866	0.978048	300	1	-7.187
Defa17	2	0.012538	0.023709	0.914136	1159	1	-4.5371	0.009532	0.0097706	0.96504	301	1	-4.5371
Gm597	6	0.23566	0.48271	0.999991	10299	3	-7.2504	0.0095496	0.013906	0.978048	302	1	-7.2504
Oip5	6	0.27423	0.53248	0.999991	11362	3	-7.497	0.0096479	0.014006	0.981425	303	1	-7.497
Cbx7	6	0.39906	0.6577	0.999991	14091	2	-3.9572	0.0097462	0.014092	0.981425	304	1	-3.9572
mmu-mir-669o	2	0.34561	0.44104	0.999991	13135	1	-1.2944	0.0097785	0.010012	0.96504	305	1	-1.2944
Taar8a	6	0.2447	0.49454	0.999991	10558	2	-5.8113	0.0097954	0.014137	0.981425	306	1	-5.8113
Ssu2	6	0.88168	0.94337	0.999991	20819	1	-3.8071	0.0098445	0.014188	0.981425	307	1	-3.8071
Defa20	5	0.0044707	0.018653	0.87895	492	4	-5.5924	0.0098912	0.012731	0.975404	308	1	-5.5924
Serpinb6b	6	0.99879	0.99878	0.999991	22477	0	-4.5638	0.0098936	0.014228	0.981425	309	1	-4.5638
Cyb5r4	6	0.066794	0.20471	0.999991	4368	3	-7.2441	0.0099428	0.014269	0.981425	310	1	-7.2441
Scx	6	0.91316	0.95337	0.999991	21098	1	-5.8942	0.0099919	0.014318	0.981425	311	1	-5.8942
Igfn1	6	0.15178	0.366	0.999991	7809	3	-7.2902	0.01009	0.014402	0.981425	312	1	-7.2902
Wac	5	0.69427	0.82786	0.999991	18630	1	-6.3145	0.010137	0.012955	0.975404	313	1	-6.3145
Zscan26	6	0.030282	0.10995	0.995842	2376	3	-7.2944	0.010238	0.014526	0.981425	314	1	-7.2944
Prickle3	6	0.11375	0.3085	0.999991	6515	4	-6.9431	0.010336	0.014622	0.981425	315	1	-6.9431
mmu-mir-7224	4	0.88533	0.89631	0.999991	20865	1	-4.563	0.010414	0.012019	0.972441	316	1	-4.563
Slc7a12	6	0.85714	0.93013	0.999991	20479	2	-4.9185	0.010434	0.014715	0.981425	317	1	-4.9185
Themis2	5	0.064676	0.18424	0.999991	4241	2	-3.2456	0.010465	0.013261	0.975404	318	1	-3.2456
Gm4301	5	0.0013412	0.0059324	0.69136	190	3	-2.2111	0.010505	0.013308	0.975404	319	1	-2.2111
Dyrk1a	5	0.17445	0.38955	0.999991	8511	3	-7.3472	0.010546	0.013347	0.975404	320	1	-7.3472
Klf7	6	0.36105	0.62946	0.999991	13416	2	-3.7937	0.010581	0.014854	0.981425	321	1	-3.7937
Ppp6r3	5	0.6767	0.81768	0.999991	18439	2	-5.9583	0.010751	0.013528	0.975404	322	1	-5.9583
mmu-mir-684-1	3	0.16507	0.3106	0.999991	8199	1	-6.8623	0.010775	0.011418	0.972441	323	1	-6.8623
6820408C15Rik	6	0.79871	0.90139	0.999991	19850	2	-5.6426	0.010778	0.015023	0.981425	324	1	-5.6426
Olfr1044	6	0.015727	0.06739	0.979113	1419	2	-5.9055	0.010827	0.015065	0.981425	325	1	-5.9055
Folr2	6	0.25663	0.5101	0.999991	10890	3	-7.338	0.010876	0.01511	0.981425	326	1	-7.338
Crhr1	5	0.36897	0.59956	0.999991	13546	3	-6.0217	0.010956	0.01372	0.975404	327	1	-6.0217
Cnnm1	6	0.5361	0.75781	0.999991	16434	3	-7.4521	0.010974	0.015203	0.981425	328	1	-7.4521
Olfr527	6	0.10154	0.28478	0.999991	6021	4	-7.0323	0.011023	0.01525	0.981425	329	1	-7.0323
Cdh22	6	0.99146	0.9914	0.999991	22295	0	-5.425	0.011072	0.015294	0.981425	330	1	-5.425
Fcrlb	6	0.016509	0.069726	0.979113	1482	3	-7.4764	0.011122	0.015336	0.981425	331	1	-7.4764
Olfr318	6	0.55273	0.76981	0.999991	16665	3	-6.7931	0.01122	0.015422	0.981425	332	1	-6.7931
Ino80	6	0.31525	0.58302	0.999991	12411	2	-5.5487	0.011318	0.015517	0.981425	333	1	-5.5487
mmu-mir-98	4	0.63448	0.7719	0.999991	17892	2	-6.0591	0.011397	0.012975	0.975404	334	1	-6.0591
Lman2l	6	0.97812	0.9789	0.999991	21945	1	-4.8593	0.011416	0.015612	0.981425	335	1	-4.8593
Ten1	6	0.17612	0.4011	0.999991	8566	3	-5.4671	0.011465	0.015646	0.981425	336	1	-5.4671
Vmn1r54	6	0.62909	0.82429	0.999991	17810	2	-6.5657	0.011514	0.015687	0.981425	337	1	-6.5657
Maoa	6	0.93767	0.96006	0.999991	21339	1	-3.8838	0.011563	0.015733	0.981425	338	1	-3.8838
Cpt1b	6	0.15807	0.3752	0.999991	7988	3	-5.0036	0.011612	0.015774	0.981425	339	1	-5.0036
Qrich2	5	0.80088	0.89382	0.999991	19878	2	-5.931	0.011651	0.014336	0.981425	340	1	-5.931
Gm10697	6	0.14256	0.35244	0.999991	7520	4	-7.6891	0.011661	0.015812	0.981425	341	1	-7.6891
Ccno	6	0.65081	0.83958	0.999991	18145	2	-6.5178	0.01171	0.015852	0.981425	342	1	-6.5178
Slitrk1	6	0.12601	0.32736	0.999991	6954	3	-7.0322	0.01176	0.015899	0.981425	343	1	-7.0322
Fth1	6	0.99041	0.99037	0.999991	22262	0	-5.749	0.011809	0.015945	0.981425	344	1	-5.749
Tsx	5	0.65648	0.80624	0.999991	18224	2	-6.0191	0.011815	0.014491	0.981425	345	1	-6.0191
Inca1	6	0.5531	0.77006	0.999991	16672	1	-6.6179	0.011907	0.016026	0.981425	346	1	-6.6179
Gm20917	1	0.98809	0.9881	0.999991	22207	0	0.89632	0.011913	0.01184	0.972441	347	1	0.89632
Tom1l2	6	0.16985	0.39222	0.999991	8373	2	-4.7216	0.011956	0.016076	0.981425	348	1	-4.7216
Fam174a	6	0.14797	0.36042	0.999991	7693	3	-5.5155	0.012005	0.01613	0.981425	349	1	-5.5155
Ankrd42	6	0.0027529	0.013523	0.848888	334	3	-6.2183	0.012054	0.016174	0.981425	350	1	-6.2183
NonTargetingControlGuideForMouse_0740	2	0.99922	0.99921	0.999991	22487	0	0.69797	0.012078	0.012258	0.972441	351	1	0.69797
Fpr3	6	0.92023	0.95514	0.999991	21156	1	-4.2884	0.012103	0.016217	0.981425	352	1	-4.2884
Tsta3	6	0.50637	0.73633	0.999991	15980	2	-5.6212	0.012201	0.016311	0.981425	353	1	-5.6212
Kcnc2	6	0.95061	0.96455	0.999991	21491	1	-5.2611	0.01225	0.016359	0.981425	354	1	-5.2611
Gpr68	6	0.98142	0.98156	0.999991	22019	1	-1.7711	0.012299	0.016402	0.981425	355	1	-1.7711
mmu-mir-344-1	1	0.98766	0.98768	0.999991	22195	0	0.81678	0.012342	0.012271	0.972441	356	1	0.81678
Cxcr3	6	0.16812	0.38972	0.999991	8310	4	-7.6405	0.012348	0.016448	0.981425	357	1	-7.6405
Dgkg	6	0.22732	0.47169	0.999991	10041	3	-5.8246	0.012397	0.016499	0.981425	358	1	-5.8246
Olfr1386	6	0.23707	0.48452	0.999991	10337	3	-6.8761	0.012446	0.016542	0.981425	359	1	-6.8761
Dnajb13	6	0.98341	0.98338	0.999991	22076	1	-4.3347	0.012495	0.016594	0.981425	360	1	-4.3347
Pcdhb17	6	0.38595	0.64793	0.999991	13856	2	-6.6363	0.012691	0.016773	0.981425	361	1	-6.6363
Olfr992	6	0.74708	0.87879	0.999991	19223	1	-2.7553	0.012789	0.016867	0.981425	362	1	-2.7553
Sv2a	5	0.84962	0.91116	0.999991	20400	1	-2.4449	0.012837	0.015393	0.981425	363	1	-2.4449
Bahd1	6	0.31592	0.58384	0.999991	12432	4	-7.4276	0.012936	0.017002	0.981425	364	1	-7.4276
Ky	6	0.050129	0.16313	0.999991	3455	1	-6.2642	0.013034	0.017096	0.981425	365	1	-6.2642
NonTargetingControlGuideForMouse_0094	2	0.99516	0.9951	0.999991	22388	0	0.016967	0.013046	0.013195	0.975404	366	1	0.016967
Rab40c	6	0.0076803	0.035218	0.953643	780	4	-8.4968	0.013083	0.017139	0.981425	367	1	-8.4968
AI464131	6	0.11206	0.30586	0.999991	6459	3	-7.0317	0.013182	0.017231	0.981425	368	1	-7.0317
Slc38a4	5	0.1285	0.30921	0.999991	7023	4	-8.1809	0.013246	0.015751	0.981425	369	1	-8.1809
NonTargetingControlGuideForMouse_0163	1	0.98675	0.98676	0.999991	22168	0	0.93628	0.01325	0.013163	0.975404	370	1	0.93628
Paox	6	0.054733	0.17486	0.999991	3718	4	-7.6976	0.01328	0.017312	0.981425	371	1	-7.6976
Pcdha12	2	0.96236	0.96247	0.999991	21650	0	-2.1066	0.013293	0.013446	0.975404	372	1	-2.1066
Olfr131	6	0.64361	0.83451	0.999991	18028	2	-4.8689	0.013329	0.017357	0.981425	373	1	-4.8689
Olfr116	5	0.12541	0.30358	0.999991	6940	3	-8.1921	0.013368	0.015866	0.981425	374	1	-8.1921
Nhs	6	0.45686	0.70024	0.999991	15109	3	-7.2715	0.013378	0.017403	0.981425	375	1	-7.2715
Fpr2	6	0.055772	0.1775	0.999991	3769	4	-8.3161	0.013427	0.017449	0.981425	376	1	-8.3161
Gm16515	6	0.23496	0.48179	0.999991	10283	3	-5.2499	0.013476	0.017489	0.981425	377	1	-5.2499
Nrd1	6	0.18073	0.4077	0.999991	8710	2	-7.139	0.013524	0.017533	0.981425	378	1	-7.139
Thsd7a	6	0.24448	0.49424	0.999991	10547	3	-2.6374	0.013573	0.017577	0.981425	379	1	-2.6374
Pp2d1	6	0.040643	0.13842	0.998679	2968	3	-3.0044	0.013622	0.01762	0.981425	380	1	-3.0044
NonTargetingControlGuideForMouse_0950	2	0.98538	0.98537	0.999991	22128	0	-1.4997	0.013637	0.013801	0.976789	381	1	-1.4997
Nrbf2	6	0.21715	0.45811	0.999991	9759	2	-5.8263	0.013671	0.017667	0.981425	382	1	-5.8263
Tubb6	5	0.33615	0.56706	0.999991	12920	3	-3.4798	0.013695	0.016157	0.981425	383	1	-3.4798
Naa60	6	0.17695	0.40226	0.999991	8589	2	-5.2126	0.01372	0.017714	0.981425	384	1	-5.2126
Mff	5	0.42997	0.65854	0.999991	14656	2	-6.2902	0.013736	0.016199	0.981425	385	1	-6.2902
Wfdc15b	6	0.57326	0.78457	0.999991	16983	2	-6.5127	0.013769	0.017758	0.981425	386	1	-6.5127
AI593442	6	0.57421	0.78529	0.999991	16998	2	-7.1042	0.013818	0.017805	0.981425	387	1	-7.1042
C1d	6	0.27819	0.53747	0.999991	11480	3	-6.9761	0.013867	0.017852	0.981425	388	1	-6.9761
Babam1	6	0.027407	0.10185	0.995842	2168	3	-5.6618	0.013916	0.0179	0.981425	389	1	-5.6618
Selrc1	6	0.99605	0.99601	0.999991	22411	0	-5.7289	0.014014	0.017981	0.981425	390	1	-5.7289
Prom1	6	0.062107	0.19332	0.999991	4101	4	-8.3031	0.014063	0.018022	0.981425	391	1	-8.3031
Kcnab1	5	0.98044	0.98052	0.999991	21998	0	-6.4101	0.014103	0.016552	0.981425	392	1	-6.4101
Rnpep	5	0.2204	0.4467	0.999991	9842	2	-6.7376	0.014185	0.016625	0.981425	393	1	-6.7376
Mcee	6	0.014506	0.06273	0.979113	1321	3	-5.5274	0.01421	0.018153	0.981425	394	1	-5.5274
NonTargetingControlGuideForMouse_0921	2	0.65747	0.6647	0.999991	18237	1	-3.0368	0.014277	0.014413	0.981425	395	1	-3.0368
Prkcz	6	0.11268	0.30683	0.999991	6487	3	-7.5833	0.014284	0.018226	0.981425	396	1	-7.5833
Igbp1b	5	0.87303	0.9183	0.999991	20698	1	-4.4305	0.014307	0.016741	0.981425	397	1	-4.4305
Mks1	6	0.06342	0.19657	0.999991	4170	3	-7.6423	0.014357	0.018291	0.981425	398	1	-7.6423
Gm10024	6	0.95224	0.96519	0.999991	21518	1	-7.1241	0.014455	0.018386	0.981425	399	1	-7.1241
Rfx3	6	0.80633	0.90493	0.999991	19947	1	-3.2551	0.014504	0.018427	0.981425	400	1	-3.2551
Scn4b	6	0.21383	0.45371	0.999991	9662	4	-6.1402	0.014553	0.018474	0.981425	401	1	-6.1402
Prdx2	6	0.10081	0.28318	0.999991	5985	4	-7.9965	0.014602	0.018514	0.981425	402	1	-7.9965
mmu-mir-23a	4	0.65082	0.78463	0.999991	18146	1	-5.5518	0.014668	0.016097	0.981425	403	1	-5.5518
Tlr1	6	0.53978	0.76046	0.999991	16497	2	-5.0768	0.0147	0.018604	0.981425	404	1	-5.0768
Fgf14	5	0.99726	0.99726	0.999991	22440	0	-2.9347	0.014797	0.017226	0.981425	405	1	-2.9347
Ccrn4l	6	0.25586	0.50907	0.999991	10878	3	-7.6001	0.014798	0.018691	0.981425	406	1	-7.6001
mmu-mir-760	3	0.80352	0.81388	0.999991	19910	1	-6.7194	0.014804	0.015346	0.981425	407	1	-6.7194
Metap2	5	0.2256	0.45235	0.999991	9989	3	-5.9065	0.014838	0.017274	0.981425	408	1	-5.9065
Pip4k2b	6	0.54969	0.76761	0.999991	16623	3	-7.3046	0.014846	0.018731	0.981425	409	1	-7.3046
Iqgap1	6	0.24725	0.49785	0.999991	10630	1	-4.3203	0.014895	0.018783	0.981425	410	1	-4.3203
Gpam	6	0.45233	0.69697	0.999991	15041	3	-7.1166	0.014944	0.018823	0.981425	411	1	-7.1166
Sike1	6	0.36308	0.63098	0.999991	13447	3	-7.3545	0.014993	0.018866	0.981425	412	1	-7.3545
Mfsd6l	6	0.16393	0.3837	0.999991	8158	3	-7.5578	0.015042	0.018909	0.981425	413	1	-7.5578
Glb1	6	0.15904	0.37659	0.999991	8013	4	-6.7552	0.015091	0.018954	0.981425	414	1	-6.7552
Gpr156	6	0.26779	0.52431	0.999991	11192	3	-5.5116	0.01514	0.019002	0.981425	415	1	-5.5116
Mlph	6	0.54422	0.76367	0.999991	16549	3	-6.8971	0.015189	0.019045	0.981425	416	1	-6.8971
Mrap2	6	0.79191	0.89833	0.999991	19766	2	-6.4447	0.015238	0.019097	0.981425	417	1	-6.4447
mmu-mir-96	4	0.99184	0.99181	0.999991	22307	0	-2.0768	0.015256	0.016679	0.981425	418	1	-2.0768
Ep300	6	0.0004866	0.0025732	0.646607	81	5	-8.9303	0.015287	0.019136	0.981425	419	1	-8.9303
Csn3	6	0.01311	0.057353	0.979113	1213	4	-8.5881	0.015336	0.019175	0.981425	420	1	-8.5881
Ccdc144b	5	0.63654	0.79512	0.999991	17920	2	-4.4536	0.015368	0.01779	0.981425	421	1	-4.4536
Vmn2r70	6	0.57006	0.78226	0.999991	16937	1	-5.2066	0.015434	0.019258	0.981425	422	1	-5.2066
Vps4a	5	0.097832	0.25159	0.999991	5847	3	-8.2838	0.01545	0.017874	0.981425	423	1	-8.2838
Matn3	6	0.22415	0.46752	0.999991	9955	4	-7.7939	0.015531	0.019357	0.981425	424	1	-7.7939
NonTargetingControlGuideForMouse_0169	2	0.93803	0.9382	0.999991	21346	0	-2.1169	0.015605	0.015729	0.981425	425	1	-2.1169
Fabp6	5	0.46237	0.68877	0.999991	15200	3	-7.4033	0.015654	0.018063	0.981425	426	1	-7.4033
Ccdc149	6	0.1431	0.35322	0.999991	7540	4	-7.8627	0.015678	0.019493	0.981425	427	1	-7.8627
St3gal5	6	0.42326	0.67566	0.999991	14524	2	-3.4271	0.015727	0.019541	0.981425	428	1	-3.4271
Snap91	6	0.97212	0.97482	0.999991	21836	1	-4.1149	0.015776	0.019588	0.981425	429	1	-4.1149
Olfr467	6	0.52686	0.75121	0.999991	16301	3	-5.6556	0.015825	0.019629	0.981425	430	1	-5.6556
Olfr676	5	0.16575	0.37493	0.999991	8217	3	-5.6681	0.015898	0.018277	0.981425	431	1	-5.6681
Olfr1013	5	0.54494	0.74628	0.999991	16559	2	-6.0191	0.015939	0.018317	0.981425	432	1	-6.0191
Ifitm7	6	0.45351	0.69782	0.999991	15060	3	-6.9797	0.016118	0.019905	0.981425	433	1	-6.9797
Zfp335	5	0.11928	0.29234	0.999991	6706	4	-7.7582	0.016143	0.018513	0.981425	434	1	-7.7582
Cnp	6	0.27873	0.53814	0.999991	11498	2	-6.6936	0.016216	0.019994	0.981425	435	1	-6.6936
Diap2	6	0.45904	0.70184	0.999991	15150	2	-7.0168	0.016265	0.020037	0.981425	436	1	-7.0168
mmu-mir-7042	4	0.2949	0.51154	0.999991	11902	1	-6.1283	0.0163	0.017682	0.981425	437	1	-6.1283
Asb1	6	0.99685	0.99682	0.999991	22431	0	-1.901	0.016314	0.020084	0.981425	438	1	-1.901
Yipf6	6	0.067021	0.20527	0.999991	4381	2	-6.0965	0.016363	0.020131	0.981425	439	1	-6.0965
Gm1979	3	0.863	0.86336	0.999991	20550	1	-3.0489	0.016397	0.016895	0.981425	440	1	-3.0489
Slc7a15	6	0.17914	0.40545	0.999991	8652	4	-6.0368	0.016509	0.020279	0.981425	441	1	-6.0368
Golim4	6	0.8745	0.93939	0.999991	20717	1	-2.9072	0.016558	0.020325	0.981425	442	1	-2.9072
Rdh10	6	0.26376	0.51918	0.999991	11088	3	-7.1782	0.016656	0.020417	0.981425	443	1	-7.1782
Olfr904	6	0.95739	0.96737	0.999991	21583	1	-2.8589	0.016705	0.020456	0.981425	444	1	-2.8589
Hp1bp3	5	0.2055	0.43072	0.999991	9422	3	-7.9733	0.016713	0.019051	0.981425	445	1	-7.9733
Ptprd	6	0.021094	0.083453	0.995842	1774	3	-4.5418	0.016753	0.0205	0.981425	446	1	-4.5418
Odf2l	4	0.87959	0.89272	0.999991	20793	1	-1.9313	0.016757	0.018119	0.981425	447	1	-1.9313
Kpna7	6	0.98991	0.98985	0.999991	22250	0	-6.3602	0.016802	0.020544	0.981425	448	1	-6.3602
Cyth4	6	0.2374	0.48497	0.999991	10344	2	-5.5601	0.016851	0.020587	0.981425	449	1	-5.5601
0610012H03Rik	6	0.40711	0.66366	0.999991	14239	2	-5.737	0.016949	0.020666	0.981425	450	1	-5.737
Ang	5	0.81132	0.90083	0.999991	20016	2	-6.0727	0.017039	0.01934	0.981425	451	1	-6.0727
Atp8b5	6	0.027114	0.101	0.995842	2145	2	-5.1525	0.017095	0.020803	0.981425	452	1	-5.1525
Il9	6	0.038946	0.13385	0.998679	2853	3	-6.4032	0.017193	0.020892	0.981425	453	1	-6.4032
Ankrd55	6	0.87324	0.93869	0.999991	20706	2	-4.4974	0.017291	0.020975	0.981425	454	1	-4.4974
Abo	5	0.11353	0.28166	0.999991	6508	2	-6.9058	0.017324	0.019596	0.981425	455	1	-6.9058
Ggta1	6	0.99227	0.99223	0.999991	22315	0	-2.9192	0.01734	0.021024	0.981425	456	1	-2.9192
Ap1g2	6	0.14857	0.36128	0.999991	7708	4	-7.75	0.017388	0.021069	0.981425	457	1	-7.75
Olfr1034	5	0.039916	0.13016	0.998679	2919	2	-7.0563	0.017406	0.019684	0.981425	458	1	-7.0563
Zfx	6	0.36741	0.63423	0.999991	13522	2	-7.042	0.017486	0.021167	0.981425	459	1	-7.042
mmu-mir-3113	4	0.24556	0.44753	0.999991	10584	2	-7.7784	0.017507	0.018847	0.981425	460	1	-7.7784
Ptchd3	6	0.86303	0.93319	0.999991	20551	1	-6.8691	0.017535	0.021212	0.981425	461	1	-6.8691
Pqlc2	6	0.47166	0.71102	0.999991	15396	2	-6.0173	0.017584	0.021268	0.981425	462	1	-6.0173
Aldh1a2	5	0.62357	0.78802	0.999991	17739	1	-6.8709	0.017609	0.019876	0.981425	463	1	-6.8709
Olfr1511	6	0.65046	0.83934	0.999991	18136	2	-6.6482	0.017681	0.021363	0.981425	464	1	-6.6482
mmu-mir-6936	2	0.65482	0.66247	0.999991	18202	1	-3.1084	0.017734	0.017808	0.981425	465	1	-3.1084
Pou5f2	6	0.094868	0.27005	0.999991	5722	2	-3.923	0.017828	0.021502	0.981425	466	1	-3.923
Rxfp2	6	0.81483	0.90896	0.999991	20057	1	-2.1807	0.017877	0.021552	0.981425	467	1	-2.1807
Hnrnpr	6	0.27123	0.52869	0.999991	11296	3	-7.3562	0.017925	0.021597	0.981425	468	1	-7.3562
mmu-mir-6984	4	0.97276	0.97271	0.999991	21853	0	-3.8836	0.017996	0.019292	0.981425	469	1	-3.8836
Olfr772	6	0.71973	0.86764	0.999991	18914	1	-6.1514	0.018023	0.021693	0.981425	470	1	-6.1514
Vmn2r53	5	0.36554	0.59621	0.999991	13486	3	-7.3006	0.018057	0.020324	0.981425	471	1	-7.3006
Olfr1154	6	0.082924	0.24275	0.999991	5152	3	-5.608	0.018072	0.021737	0.981425	472	1	-5.608
Olfr711	6	0.34566	0.61811	0.999991	13136	2	-6.3457	0.018121	0.021785	0.981425	473	1	-6.3457
Rras2	6	0.027365	0.10173	0.995842	2164	5	-8.2152	0.018169	0.021828	0.981425	474	1	-8.2152
Nucks1	6	0.83247	0.9175	0.999991	20216	1	-3.4106	0.018218	0.02187	0.981425	475	1	-3.4106
Tspan3	5	0.98808	0.98806	0.999991	22205	0	-5.5451	0.01822	0.020472	0.981425	476	1	-5.5451
Prima1	6	0.43788	0.6863	0.999991	14788	3	-5.8467	0.018316	0.021964	0.981425	477	1	-5.8467
Pyroxd1	6	0.78364	0.89468	0.999991	19666	2	-6.7768	0.018365	0.022004	0.981425	478	1	-6.7768
Psma1	5	0.19704	0.42153	0.999991	9169	3	-5.4857	0.018464	0.020696	0.981425	479	1	-5.4857
Kdm4a	5	0.78196	0.88146	0.999991	19635	2	-4.2187	0.018545	0.02078	0.981425	480	1	-4.2187
Mdh1b	6	0.85119	0.92705	0.999991	20416	2	-4.9393	0.018609	0.022243	0.981425	481	1	-4.9393
Gdap1	6	0.22732	0.4717	0.999991	10042	4	-5.8888	0.018657	0.022282	0.981425	482	1	-5.8888
Myh2	5	0.32024	0.55096	0.999991	12536	1	-4.5608	0.018667	0.020891	0.981425	483	1	-4.5608
Unc13a	6	0.27796	0.53717	0.999991	11469	1	-2.8684	0.018706	0.022322	0.981425	484	1	-2.8684
NonTargetingControlGuideForMouse_0427	2	0.21364	0.33535	0.999991	9656	1	-3.7503	0.018732	0.018778	0.981425	485	1	-3.7503
Slc25a21	6	0.058753	0.18505	0.999991	3924	4	-8.3063	0.018804	0.022416	0.981425	486	1	-8.3063
Mbd4	5	0.64749	0.80118	0.999991	18091	1	-6.3859	0.01883	0.021044	0.981425	487	1	-6.3859
Soga3	6	0.96415	0.97048	0.999991	21687	1	-6.1254	0.018852	0.022463	0.981425	488	1	-6.1254
Ppat	6	0.99297	0.99294	0.999991	22339	0	-3.4945	0.018901	0.022515	0.981425	489	1	-3.4945
Adrb1	6	0.14771	0.36003	0.999991	7681	1	-5.7056	0.01895	0.022568	0.981425	490	1	-5.7056
1700022P22Rik	6	0.082203	0.2411	0.999991	5117	4	-7.6462	0.018999	0.022611	0.981425	491	1	-7.6462
Gstm1	4	0.55934	0.71407	0.999991	16769	1	-4.1429	0.019006	0.020269	0.981425	492	1	-4.1429
Phgdh	6	0.65574	0.84295	0.999991	18215	2	-4.0515	0.019145	0.022752	0.981425	493	1	-4.0515
Olfr355	5	0.3138	0.54448	0.999991	12377	3	-7.728	0.019155	0.021344	0.981425	494	1	-7.728
Ccdc71l	6	0.16675	0.38772	0.999991	8262	4	-7.958	0.019194	0.0228	0.981425	495	1	-7.958
Gskip	6	0.010827	0.04828	0.979113	1039	3	-6.1659	0.019243	0.022839	0.981425	496	1	-6.1659
Slc22a26	6	0.18798	0.41787	0.999991	8919	4	-7.7452	0.019291	0.022889	0.981425	497	1	-7.7452
Zcrb1	6	0.30883	0.57532	0.999991	12259	2	-6.0482	0.019389	0.022973	0.981425	498	1	-6.0482
Il12a	6	0.61089	0.81151	0.999991	17546	2	-5.5563	0.019438	0.023018	0.981425	499	1	-5.5563
Vmn2r65	6	0.070966	0.2148	0.999991	4586	4	-6.0359	0.019486	0.023061	0.981425	500	1	-6.0359
A530054K11Rik	5	0.056467	0.16677	0.999991	3803	3	-8.4609	0.019521	0.021681	0.981425	501	1	-8.4609
1810062G17Rik	6	0.020342	0.081227	0.991417	1735	3	-3.1234	0.019535	0.023099	0.981425	502	1	-3.1234
NonTargetingControlGuideForMouse_0166	2	0.96392	0.96403	0.999991	21680	0	-2.0914	0.01955	0.019605	0.981425	503	1	-2.0914
Serpinb9d	6	0.012709	0.055754	0.979113	1175	5	-8.4529	0.019584	0.023153	0.981425	504	1	-8.4529
Tnks2	5	0.90346	0.92927	0.999991	21028	1	-5.772	0.019602	0.021753	0.981425	505	1	-5.772
Amy2a2	6	0.034644	0.12213	0.998679	2626	3	-1.441	0.019632	0.023193	0.981425	506	1	-1.441
mmu-mir-3544	3	0.41322	0.56846	0.999991	14336	2	-7.5609	0.019652	0.020094	0.981425	507	1	-7.5609
Evpl	6	0.53942	0.76019	0.999991	16493	3	-7.3958	0.019681	0.023246	0.981425	508	1	-7.3958
Mypop	6	0.563	0.77718	0.999991	16831	2	-6.4379	0.01973	0.023294	0.981425	509	1	-6.4379
Nkiras2	5	0.60117	0.77588	0.999991	17406	2	-5.5599	0.019765	0.021912	0.981425	510	1	-5.5599
Nr0b1	6	0.10766	0.29805	0.999991	6271	4	-7.5734	0.019779	0.023343	0.981425	511	1	-7.5734
Tmem74	6	0.14296	0.35304	0.999991	7539	3	-6.2517	0.019827	0.023385	0.981425	512	1	-6.2517
Bcl7b	5	0.69228	0.82673	0.999991	18606	1	-6.126	0.019887	0.022029	0.981425	513	1	-6.126
Hivep2	6	0.51054	0.73932	0.999991	16044	3	-3.6285	0.019925	0.02347	0.981425	514	1	-3.6285
NonTargetingControlGuideForMouse_0279	2	0.52026	0.55753	0.999991	16204	1	-3.4183	0.019926	0.01999	0.981425	515	1	-3.4183
Ubqln2	5	0.14712	0.34263	0.999991	7666	2	-5.0972	0.019927	0.022066	0.981425	516	1	-5.0972
Nkain4	6	0.26354	0.5189	0.999991	11079	3	-6.6251	0.019974	0.023518	0.981425	517	1	-6.6251
Prdm15	6	0.43727	0.68587	0.999991	14779	3	-7.3703	0.020071	0.023615	0.981425	518	1	-7.3703
Ppapdc3	6	0.21579	0.45634	0.999991	9730	3	-6.6821	0.02012	0.023663	0.981425	519	1	-6.6821
Plscr2	5	0.53259	0.73998	0.999991	16382	2	-2.9417	0.020131	0.022259	0.981425	520	1	-2.9417
Hoxa9	6	0.047277	0.15579	0.999991	3325	3	-6.9039	0.020168	0.023709	0.981425	521	1	-6.9039
Hace1	5	0.17573	0.39171	0.999991	8545	2	-2.9283	0.020171	0.022302	0.981425	522	1	-2.9283
Olfr820	6	0.3212	0.59018	0.999991	12563	2	-7.0934	0.020217	0.023746	0.981425	523	1	-7.0934
Itgb1bp1	6	0.92469	0.95632	0.999991	21205	1	-3.8441	0.020266	0.023784	0.981425	524	1	-3.8441
Gm4981	6	0.25552	0.50861	0.999991	10872	3	-7.513	0.020315	0.023831	0.981425	525	1	-7.513
NonTargetingControlGuideForMouse_0863	2	0.79807	0.79764	0.999991	19836	0	-3.0039	0.020335	0.020399	0.981425	526	1	-3.0039
Atat1	6	0.51136	0.73991	0.999991	16057	2	-1.0389	0.020363	0.023881	0.981425	527	1	-1.0389
Slc40a1	6	0.88588	0.94573	0.999991	20871	1	-6.4323	0.020461	0.023962	0.981425	528	1	-6.4323
Slc25a15	6	0.63932	0.83149	0.999991	17972	3	-6.8437	0.020509	0.024011	0.981425	529	1	-6.8437
Olfr207	6	0.8024	0.90306	0.999991	19892	2	-4.3864	0.020607	0.024097	0.981425	530	1	-4.3864
Kcnh5	6	0.018365	0.075318	0.986484	1617	4	-5.4163	0.020704	0.024196	0.981425	531	1	-5.4163
Lrrc9	5	0.68422	0.82198	0.999991	18520	1	-3.5602	0.02078	0.022864	0.981425	532	1	-3.5602
Clic3	5	0.28114	0.51089	0.999991	11555	3	-3.4357	0.020821	0.0229	0.981425	533	1	-3.4357
NonTargetingControlGuideForMouse_0239	2	0.84306	0.84298	0.999991	20321	0	-2.936	0.020858	0.020927	0.981425	534	1	-2.936
Cldn20	5	0.93	0.9416	0.999991	21258	1	-6.9995	0.020862	0.022932	0.981425	535	1	-6.9995
Atg4b	6	0.95118	0.96477	0.999991	21500	1	-4.1772	0.020899	0.024372	0.981425	536	1	-4.1772
mmu-mir-92a-2	4	0.43402	0.62112	0.999991	14720	2	-6.6929	0.020925	0.022082	0.981425	537	1	-6.6929
Sema3a	6	0.072642	0.21875	0.999991	4674	4	-7.7699	0.020948	0.024418	0.981425	538	1	-7.7699
Nt5e	6	0.83747	0.92	0.999991	20271	2	-3.4434	0.020996	0.024463	0.981425	539	1	-3.4434
mmu-mir-1930	4	0.17202	0.34543	0.999991	8444	3	-8.0283	0.021023	0.022171	0.981425	540	1	-8.0283
Spsb1	5	0.68613	0.82307	0.999991	18542	2	-3.7311	0.021024	0.023079	0.981425	541	1	-3.7311
Tmem55b	5	0.90004	0.92793	0.999991	20999	1	-5.4587	0.021065	0.023119	0.981425	542	1	-5.4587
Rtn1	5	0.0022133	0.0096223	0.83069	270	2	-7.2346	0.021105	0.023155	0.981425	543	1	-7.2346
mmu-mir-202	4	0.37916	0.58144	0.999991	13747	2	-6.9816	0.02112	0.022267	0.981425	544	1	-6.9816
Tmem38b	6	0.34996	0.6213	0.999991	13227	2	-6.201	0.021142	0.024602	0.98388	545	1	-6.201
Adam22	5	0.77311	0.87577	0.999991	19522	2	-3.4455	0.021186	0.023238	0.981425	546	1	-3.4455
Map1b	6	0.056632	0.17968	0.999991	3817	4	-8.0838	0.021191	0.024643	0.98388	547	1	-8.0838
Ahrr	6	0.56454	0.77829	0.999991	16853	2	-5.9838	0.02124	0.02469	0.98388	548	1	-5.9838
Tspan14	6	0.99254	0.9925	0.999991	22326	0	-6.2169	0.021288	0.024742	0.98388	549	1	-6.2169
Vmn1r17	6	0.76615	0.88697	0.999991	19444	2	-5.3694	0.021337	0.024792	0.984101	550	1	-5.3694
Defb33	5	0.084319	0.22485	0.999991	5227	2	-6.2445	0.02147	0.023498	0.981425	551	1	-6.2445
Cdk5rap3	6	0.61152	0.81194	0.999991	17558	3	-7.0611	0.021483	0.024938	0.988124	552	1	-7.0611
Pramef12	6	0.96148	0.9692	0.999991	21636	1	-4.1486	0.021532	0.024981	0.988124	553	1	-4.1486
mmu-mir-3078	4	0.56938	0.72165	0.999991	16928	2	-7.2791	0.021543	0.022683	0.981425	554	1	-7.2791
Trim17	6	0.093146	0.26611	0.999991	5646	4	-5.1779	0.02158	0.02503	0.988336	555	1	-5.1779
Pgap3	6	0.079692	0.23522	0.999991	5001	4	-7.6998	0.021678	0.025127	0.988628	556	1	-7.6998
Olfr639	6	0.0096318	0.043471	0.963251	945	5	-8.1608	0.021726	0.025171	0.988628	557	1	-8.1608
NonTargetingControlGuideForMouse_0067	2	0.81096	0.81069	0.999991	20010	0	-3.0446	0.021773	0.021831	0.981425	558	1	-3.0446
Lrrc2	6	0.51326	0.74133	0.999991	16088	2	-3.9833	0.021775	0.025213	0.988628	559	1	-3.9833
Slco3a1	5	0.65544	0.80565	0.999991	18210	1	-7.1063	0.021795	0.02381	0.981425	560	1	-7.1063
NonTargetingControlGuideForMouse_0368	2	0.70695	0.70847	0.999991	18746	1	-3.2961	0.021838	0.02189	0.981425	561	1	-3.2961
Cdc42se1	6	0.41852	0.67214	0.999991	14435	3	-7.1048	0.021872	0.025309	0.988628	562	1	-7.1048
Pgd	5	0.96878	0.96891	0.999991	21776	0	-6.2445	0.021998	0.024006	0.981425	563	1	-6.2445
Myo5c	6	0.28945	0.55155	0.999991	11775	4	-5.4731	0.022018	0.02544	0.988628	564	1	-5.4731
Dcun1d3	6	0.94586	0.96278	0.999991	21435	1	-2.0781	0.022164	0.02557	0.988628	565	1	-2.0781
Ackr2	6	0.087324	0.25286	0.999991	5375	4	-6.5965	0.022261	0.025655	0.988628	566	1	-6.5965
Tenm4	5	0.17282	0.38684	0.999991	8470	2	-3.3097	0.022282	0.024278	0.981425	567	1	-3.3097
Olfr592	6	0.2842	0.54496	0.999991	11634	3	-2.7254	0.02231	0.025704	0.988628	568	1	-2.7254
Btaf1	5	0.21427	0.44014	0.999991	9668	1	-2.7452	0.022363	0.024347	0.981425	569	1	-2.7452
Gm10334	6	0.085246	0.24813	0.999991	5278	3	-7.8156	0.022407	0.025793	0.988628	570	1	-7.8156
Me3	6	0.027395	0.10182	0.995842	2166	4	-8.5231	0.022456	0.025841	0.988628	571	1	-8.5231
mmu-mir-155	4	0.36399	0.57042	0.999991	13463	2	-5.9935	0.022485	0.023609	0.981425	572	1	-5.9935
Olfr874	6	0.95451	0.96614	0.999991	21547	1	-6.7495	0.022602	0.025971	0.988628	573	1	-6.7495
Tmem8b	6	0.056998	0.18063	0.999991	3835	3	-7.2686	0.02265	0.026019	0.988628	574	1	-7.2686
Sept12	6	0.0053641	0.025255	0.914136	582	4	-7.7194	0.022699	0.026063	0.988628	575	1	-7.7194
Dppa4	5	0.32348	0.55424	0.999991	12614	3	-6.4059	0.022768	0.024713	0.98388	576	1	-6.4059
Nudt14	6	0.33644	0.60811	0.999991	12925	2	-5.924	0.022845	0.026204	0.988628	577	1	-5.924
Moxd2	6	0.95778	0.96753	0.999991	21588	1	-5.8168	0.022893	0.026252	0.988628	578	1	-5.8168
Slc25a36	6	0.98303	0.98301	0.999991	22069	1	-6.174	0.022991	0.026341	0.988628	579	1	-6.174
Mccc2	6	0.47482	0.71335	0.999991	15460	2	-5.8202	0.023039	0.026391	0.988628	580	1	-5.8202
Lcp1	6	0.5941	0.7996	0.999991	17302	3	-6.3784	0.023088	0.026432	0.988628	581	1	-6.3784
1700074P13Rik	6	0.58648	0.79414	0.999991	17179	1	-5.2	0.023136	0.026485	0.988628	582	1	-5.2
Nme4	6	0.61297	0.81299	0.999991	17595	2	-7.1171	0.023185	0.026526	0.988628	583	1	-7.1171
Crls1	6	0.834	0.91828	0.999991	20235	2	-6.6719	0.023234	0.02657	0.988628	584	1	-6.6719
mmu-mir-6540	4	0.44288	0.62757	0.999991	14861	2	-7.3006	0.023264	0.024342	0.981425	585	1	-7.3006
Gcnt7	6	0.69322	0.85719	0.999991	18617	2	-5.8499	0.023282	0.026609	0.988628	586	1	-5.8499
Mpp3	6	0.62943	0.82453	0.999991	17813	2	-4.9416	0.023331	0.026656	0.988628	587	1	-4.9416
Atg5	6	0.46693	0.70758	0.999991	15285	2	-7.0218	0.023428	0.026751	0.988628	588	1	-7.0218
Fam72a	6	0.037576	0.1302	0.998679	2776	3	-4.3777	0.023525	0.026841	0.988878	589	1	-4.3777
Prx	6	0.41449	0.66911	0.999991	14356	2	-6.7662	0.023574	0.026889	0.988878	590	1	-6.7662
Mettl7a2Higd1c	1	0.97634	0.97636	0.999991	21916	0	0.13625	0.023664	0.023569	0.981425	591	0	0.13625
NonTargetingControlGuideForMouse_0459	1	0.9763	0.97632	0.999991	21915	0	0.045125	0.023697	0.023605	0.981425	592	0	0.045125
Krtap27-1	6	0.071501	0.21606	0.999991	4617	4	-6.6927	0.023719	0.027022	0.99051	593	1	-6.6927
Zfp418	5	0.93253	0.94295	0.999991	21289	1	-3.6808	0.023741	0.025665	0.988628	594	1	-3.6808
NonTargetingControlGuideForMouse_0750	2	0.95002	0.9501	0.999991	21482	0	-0.31551	0.023846	0.023899	0.981425	595	1	-0.31551
Prss36	6	0.093086	0.26597	0.999991	5643	3	-6.9476	0.023914	0.027201	0.993241	596	1	-6.9476
Vash2	6	0.0242	0.092588	0.995842	1969	5	-8.4181	0.023962	0.027241	0.993241	597	1	-8.4181
NonTargetingControlGuideForMouse_0604	2	0.56489	0.59057	0.999991	16860	1	-3.5562	0.024058	0.024111	0.981425	598	1	-3.5562
Zfp13	6	0.14197	0.35152	0.999991	7494	4	-7.8507	0.024059	0.027336	0.993241	599	1	-7.8507
Pcdhga8	3	0.088487	0.19863	0.999991	5434	1	-3.7562	0.024071	0.024447	0.981425	600	1	-3.7562
NonTargetingControlGuideForMouse_0249	2	0.86734	0.8674	0.999991	20621	0	-2.8835	0.024075	0.024127	0.981425	601	1	-2.8835
Abhd8	5	0.44063	0.66848	0.999991	14831	2	-7.2934	0.024105	0.026006	0.988628	602	1	-7.2934
Tspan10	5	0.9099	0.93193	0.999991	21072	1	-4.8081	0.024146	0.026039	0.988628	603	1	-4.8081
Adamts20	5	0.42068	0.6497	0.999991	14476	3	-6.9801	0.024227	0.026125	0.988628	604	1	-6.9801
Dpcr1	6	0.24024	0.48869	0.999991	10419	3	-6.733	0.024253	0.027507	0.993241	605	1	-6.733
Ppp1r16b	6	0.56637	0.7796	0.999991	16880	2	-5.9132	0.024302	0.027548	0.993241	606	1	-5.9132
Hist1h3b	5	0.053941	0.16127	0.999991	3671	2	-6.8252	0.024389	0.026284	0.988628	607	1	-6.8252
Fbln2	6	0.48678	0.72212	0.999991	15678	2	-5.7277	0.024399	0.027634	0.993241	608	1	-5.7277
Pnmal2	5	0.1845	0.40624	0.999991	8825	2	-6.5626	0.024429	0.026311	0.988628	609	1	-6.5626
Golga5	6	0.094115	0.26835	0.999991	5695	2	-5.5032	0.024448	0.02768	0.993241	610	1	-5.5032
Trim2	6	0.68768	0.85505	0.999991	18559	1	-4.1449	0.024496	0.027729	0.993241	611	1	-4.1449
Rnf130	6	0.58103	0.79017	0.999991	17092	2	-6.7527	0.024545	0.027783	0.993241	612	1	-6.7527
Vmn1r91	5	0.26203	0.4908	0.999991	11040	2	-7.1006	0.024591	0.02647	0.988628	613	1	-7.1006
Hs3st3b1	6	0.10673	0.29605	0.999991	6233	3	-5.8583	0.024642	0.027874	0.993241	614	1	-5.8583
Fyn	5	0.83639	0.90754	0.999991	20261	1	-4.3957	0.024713	0.026598	0.988628	615	1	-4.3957
Cygb	6	0.10148	0.28465	0.999991	6017	5	-7.6359	0.024739	0.027966	0.993241	616	1	-7.6359
Plxdc1	6	0.12131	0.32018	0.999991	6789	4	-7.9252	0.024787	0.028008	0.993241	617	1	-7.9252
mmu-mir-489	4	0.65697	0.78947	0.999991	18229	2	-6.1572	0.024789	0.025798	0.988628	618	1	-6.1572
Lysmd3	5	0.57019	0.75939	0.999991	16943	2	-5.6488	0.024794	0.026667	0.988628	619	1	-5.6488
Tgfbrap1	5	0.552	0.74993	0.999991	16662	2	-7.3235	0.024874	0.026744	0.988628	620	1	-7.3235
Apobr	5	0.62198	0.78712	0.999991	17722	2	-6.7823	0.024996	0.026856	0.988878	621	1	-6.7823
Pvrl1	5	0.87804	0.91996	0.999991	20767	1	-3.9096	0.025158	0.026992	0.99051	622	1	-3.9096
mmu-mir-6992	3	0.86841	0.8686	0.999991	20635	1	-7.2145	0.025241	0.025606	0.988628	623	1	-7.2145
Icam1	6	0.49278	0.72638	0.999991	15773	3	-5.418	0.025321	0.028482	0.997205	624	1	-5.418
Olfr39	4	0.91857	0.92025	0.999991	21140	1	-5.0422	0.025404	0.026389	0.988628	625	1	-5.0422
Ankrd46	6	0.044084	0.14742	0.999991	3164	3	-7.3548	0.025418	0.028571	0.997205	626	1	-7.3548
Ccdc127	6	0.099487	0.28032	0.999991	5922	2	-5.8093	0.025466	0.028615	0.997205	627	1	-5.8093
Vwa3a	6	0.70036	0.85996	0.999991	18690	1	-6.8699	0.025515	0.028662	0.997205	628	1	-6.8699
Btnl4	6	0.25785	0.51165	0.999991	10928	4	-7.1638	0.025563	0.028703	0.997205	629	1	-7.1638
Usp17lb	6	0.5073	0.737	0.999991	15994	3	-6.7304	0.025612	0.028744	0.997205	630	1	-6.7304
Card14	6	0.0012972	0.0065548	0.716132	188	4	-7.7462	0.02566	0.028793	0.997205	631	1	-7.7462
NonTargetingControlGuideForMouse_0082	2	0.83345	0.83324	0.999991	20228	0	-1.8384	0.025755	0.025766	0.988628	632	1	-1.8384
Thbs3	6	0.58853	0.79564	0.999991	17204	2	-5.3811	0.025757	0.028878	0.997205	633	1	-5.3811
Ccdc18	6	0.16271	0.38194	0.999991	8115	3	-7.3132	0.025806	0.028925	0.997205	634	1	-7.3132
Plin5	6	0.046618	0.15409	0.999991	3282	3	-5.5446	0.025854	0.028972	0.997205	635	1	-5.5446
1700042G07Rik	6	0.30501	0.57065	0.999991	12158	2	-6.8762	0.025903	0.02902	0.997205	636	1	-6.8762
Dnajc21	6	0.62053	0.81829	0.999991	17707	3	-6.9846	0.025951	0.029072	0.997205	637	1	-6.9846
NonTargetingControlGuideForMouse_0929	2	0.86449	0.86457	0.999991	20574	0	-2.8737	0.025983	0.025991	0.988628	638	1	-2.8737
Vasn	6	0.73691	0.87461	0.999991	19107	2	-5.9533	0.026	0.029109	0.997205	639	1	-5.9533
Rhox3f	5	0.71878	0.84223	0.999991	18904	1	-3.9759	0.026007	0.02778	0.993241	640	1	-3.9759
Tcstv1	6	0.10366	0.2894	0.999991	6110	3	-6.9892	0.026048	0.029159	0.997404	641	1	-6.9892
Dnph1	5	0.67464	0.81651	0.999991	18422	2	-6.8731	0.026128	0.027897	0.993241	642	1	-6.8731
Rnf126	6	0.50027	0.73182	0.999991	15894	3	-6.2786	0.026242	0.029342	0.999017	643	1	-6.2786
Olfr152	6	0.58568	0.79356	0.999991	17164	2	-4.5882	0.026291	0.029388	0.999017	644	1	-4.5882
Olfr1219	6	0.22578	0.46963	0.999991	9993	4	-7.7555	0.026388	0.029478	0.999017	645	1	-7.7555
Shkbp1	5	0.10836	0.27191	0.999991	6310	2	-3.7779	0.026411	0.028162	0.995454	646	1	-3.7779
I830077J02Rik	6	0.71503	0.86577	0.999991	18851	2	-5.9571	0.026436	0.029529	0.999017	647	1	-5.9571
2210404O09Rik	6	0.3315	0.60234	0.999991	12815	2	-6.6927	0.026484	0.029581	0.999017	648	1	-6.6927
Il17d	5	0.97649	0.97655	0.999991	21920	0	-2.9286	0.026533	0.028285	0.997205	649	1	-2.9286
Sowahb	6	0.262	0.51697	0.999991	11034	3	-7.457	0.026533	0.029626	0.999017	650	1	-7.457
mmu-mir-2137	4	0.95205	0.95197	0.999991	21514	0	-6.3466	0.02657	0.027522	0.993241	651	1	-6.3466
Gpr157	6	0.3671	0.63398	0.999991	13518	3	-6.4585	0.02663	0.029711	0.999017	652	1	-6.4585
Supt7l	6	0.71045	0.86396	0.999991	18789	2	-7.1415	0.026727	0.029807	0.999017	653	1	-7.1415
mmu-mir-6938	4	0.063627	0.17732	0.999991	4187	3	-6.9729	0.026732	0.027683	0.993241	654	1	-6.9729
Nsl1	5	0.3511	0.58189	0.999991	13250	3	-7.6466	0.026735	0.02848	0.997205	655	1	-7.6466
Clip3	5	0.3406	0.57155	0.999991	13017	3	-7.3527	0.026815	0.028555	0.997205	656	1	-7.3527
Zfyve19	6	0.96642	0.97163	0.999991	21730	1	-5.1699	0.026824	0.029899	0.999017	657	1	-5.1699
Etaa1	4	0.7608	0.83782	0.999991	19378	1	-3.9779	0.026862	0.027799	0.993241	658	1	-3.9779
Lum	6	0.98545	0.98541	0.999991	22130	0	-5.0466	0.02692	0.029983	0.999017	659	1	-5.0466
Pramef6	4	0.93658	0.93646	0.999991	21322	1	-5.3016	0.026959	0.027889	0.993241	660	1	-5.3016
Pltp	6	0.24095	0.48964	0.999991	10441	3	-6.9014	0.026969	0.030031	0.999017	661	1	-6.9014
Cxcl15	6	0.55498	0.77144	0.999991	16701	2	-4.4745	0.027066	0.030113	0.999017	662	1	-4.4745
Sdr42e1	6	0.716	0.86615	0.999991	18866	2	-2.8801	0.027114	0.030151	0.999017	663	1	-2.8801
Rbl2	6	0.21413	0.45411	0.999991	9666	3	-6.6684	0.027163	0.030199	0.999017	664	1	-6.6684
Grap	6	0.00096241	0.0049342	0.651208	147	4	-8.9932	0.027308	0.030339	0.999017	665	1	-8.9932
NonTargetingControlGuideForMouse_0307	2	0.95459	0.9547	0.999991	21549	0	-0.94441	0.027335	0.027312	0.993241	666	1	-0.94441
Pdilt	5	0.027159	0.097578	0.995842	2149	2	-6.6019	0.02734	0.029041	0.997205	667	1	-6.6019
Mllt1	6	0.97911	0.97964	0.999991	21967	1	-5.4987	0.027356	0.030382	0.999017	668	1	-5.4987
Dnajc19	5	0.042491	0.13598	0.998679	3073	2	-7.1739	0.027381	0.029086	0.997205	669	1	-7.1739
Asb14	6	0.57106	0.78299	0.999991	16959	3	-6.9815	0.027405	0.030423	0.999017	670	1	-6.9815
Xiap	6	0.0091563	0.04148	0.962693	899	2	-5.3035	0.027453	0.030468	0.999017	671	1	-5.3035
Swap70	6	0.21578	0.45633	0.999991	9729	3	-6.7704	0.02755	0.030555	0.999017	672	1	-6.7704
Nos1ap	6	0.16027	0.37835	0.999991	8047	4	-5.49	0.027647	0.030652	0.999017	673	1	-5.49
Fam83c	6	0.056522	0.1794	0.999991	3809	3	-7.4982	0.027744	0.030742	0.999017	674	1	-7.4982
Swi5	3	0.74568	0.77495	0.999991	19208	1	-1.6808	0.027772	0.028023	0.993241	675	1	-1.6808
Bzrap1	6	0.18037	0.4072	0.999991	8703	4	-7.8726	0.027792	0.030779	0.999017	676	1	-7.8726
Hormad1	6	0.2491	0.50026	0.999991	10684	3	-5.0407	0.02784	0.030826	0.999017	677	1	-5.0407
NonTargetingControlGuideForMouse_0714	2	0.97605	0.97604	0.999991	21911	0	-2.1579	0.027857	0.027832	0.993241	678	1	-2.1579
Zfp707	6	0.37787	0.64196	0.999991	13732	3	-5.8705	0.027889	0.030861	0.999017	679	1	-5.8705
Olfr1033	5	0.47092	0.69673	0.999991	15376	3	-7.3971	0.027906	0.029565	0.999017	680	1	-7.3971
Ephb4	6	0.9989	0.99889	0.999991	22480	0	-5.5378	0.027986	0.030945	0.999017	681	1	-5.5378
Gm14459	6	0.014846	0.064057	0.979113	1355	4	-4.3778	0.028034	0.030989	0.999017	682	1	-4.3778
Ssx2ip	6	0.59554	0.8006	0.999991	17319	1	-6.3655	0.028082	0.031033	0.999017	683	1	-6.3655
Zfp825	6	0.61499	0.81444	0.999991	17626	2	-5.6905	0.028131	0.031079	0.999017	684	1	-5.6905
Ogg1	6	0.9704	0.97379	0.999991	21801	1	-5.1929	0.028179	0.031123	0.999017	685	1	-5.1929
mmu-mir-7238	4	0.40233	0.59814	0.999991	14151	1	-1.4669	0.028188	0.02905	0.997205	686	1	-1.4669
Prelp	6	0.13856	0.34635	0.999991	7354	3	-6.9201	0.028227	0.03117	0.999017	687	1	-6.9201
mmu-mir-7045	3	0.97901	0.97915	0.999991	21965	0	-3.6628	0.028233	0.028484	0.997205	688	1	-3.6628
Cd99l2	5	0.02293	0.084065	0.995842	1884	4	-7.9051	0.028269	0.029919	0.999017	689	1	-7.9051
Fam151b	6	0.47224	0.71144	0.999991	15411	3	-7.2224	0.028276	0.031216	0.999017	690	1	-7.2224
mmu-mir-466f-3	1	0.97172	0.97175	0.999991	21824	0	-0.15835	0.02828	0.028174	0.995454	691	0	-0.15835
Pom121	6	0.05535	0.17645	0.999991	3758	5	-8.1755	0.028469	0.031415	0.999017	692	1	-8.1755
Chit1	6	0.99629	0.99625	0.999991	22417	0	-3.8762	0.028518	0.031453	0.999017	693	1	-3.8762
Txnrd1	5	0.50538	0.72617	0.999991	15962	2	-6.7587	0.028551	0.030176	0.999017	694	1	-6.7587
Acvr1c	6	0.096	0.27256	0.999991	5760	3	-6.3211	0.028566	0.031497	0.999017	695	1	-6.3211
Fam196b	6	0.21538	0.4558	0.999991	9713	3	-7.5847	0.028614	0.031547	0.999017	696	1	-7.5847
Fbxo21	5	0.78412	0.88286	0.999991	19674	2	-4.5643	0.028632	0.030254	0.999017	697	1	-4.5643
Hsf2	6	0.34412	0.61694	0.999991	13112	3	-7.1421	0.028663	0.031585	0.999017	698	1	-7.1421
Olfr1242	6	0.2352	0.48208	0.999991	10292	3	-6.7308	0.028711	0.031636	0.999017	699	1	-6.7308
Krt18	6	0.017542	0.072815	0.980548	1567	3	-6.5449	0.02876	0.031687	0.999017	700	1	-6.5449
Mark1	5	0.10964	0.27429	0.999991	6379	3	-7.9022	0.028794	0.030411	0.999017	701	1	-7.9022
Fmn1	6	0.31035	0.57713	0.999991	12292	3	-7.3696	0.028808	0.031733	0.999017	702	1	-7.3696
Sema5b	6	0.0065576	0.030486	0.930365	690	5	-8.6483	0.028953	0.031859	0.999017	703	1	-8.6483
Otc	5	0.34978	0.58054	0.999991	13224	2	-7.3232	0.029036	0.030662	0.999017	704	1	-7.3232
Cdkn2aip	6	0.64492	0.83548	0.999991	18056	3	-7.3142	0.029098	0.031989	0.999017	705	1	-7.3142
Olfr507	5	0.19175	0.41577	0.999991	9021	3	-8.0057	0.029197	0.030801	0.999017	706	1	-8.0057
Ghdc	6	0.25204	0.50409	0.999991	10780	4	-5.6164	0.029291	0.032161	0.999017	707	1	-5.6164
Cetn2	6	0.44514	0.69169	0.999991	14905	3	-7.1761	0.029485	0.032329	0.999017	708	1	-7.1761
Sugt1	6	0.87615	0.9403	0.999991	20737	2	-5.7841	0.029533	0.03238	0.999017	709	1	-5.7841
Zfml	5	0.24962	0.47785	0.999991	10696	1	-5.8756	0.0296	0.031173	0.999017	710	1	-5.8756
Olfr1212	6	0.24448	0.49424	0.999991	10549	3	-5.0631	0.02963	0.032462	0.999017	711	1	-5.0631
mmu-mir-330	3	0.0079885	0.021596	0.914136	803	2	-9.2224	0.029667	0.029914	0.999017	712	1	-9.2224
Il5ra	5	0.055573	0.16484	0.999991	3763	3	-6.7467	0.029802	0.031365	0.999017	713	1	-6.7467
Pdap1	6	0.64198	0.83336	0.999991	18006	3	-2.3838	0.029823	0.032633	0.999017	714	1	-2.3838
Cwc25	6	0.78894	0.89698	0.999991	19731	2	-5.5641	0.029968	0.032766	0.999017	715	1	-5.5641
Gm10058	6	1.6873e-08	2.1995e-07	0.000619	3	4	-3.5401	0.030161	0.032945	0.999017	716	1	-3.5401
Vmn1r187	3	0.39575	0.55088	0.999991	14036	1	-1.8487	0.030201	0.030473	0.999017	717	1	-1.8487
Dnmt3a	6	0.089474	0.25775	0.999991	5479	2	-6.7029	0.030209	0.032988	0.999017	718	1	-6.7029
Prox1	6	0.63743	0.83018	0.999991	17936	3	-5.9605	0.030258	0.033033	0.999017	719	1	-5.9605
Olfml3	6	0.29364	0.55674	0.999991	11874	2	-4.7918	0.030306	0.033085	0.999017	720	1	-4.7918
Tmsb4x	3	0.46327	0.61835	0.999991	15212	1	-2.0135	0.030395	0.030654	0.999017	721	1	-2.0135
Stap2	5	0.3171	0.54782	0.999991	12459	3	-7.7218	0.030446	0.03199	0.999017	722	1	-7.7218
Slc39a12	6	0.064891	0.20011	0.999991	4255	3	-5.9566	0.030451	0.033212	0.999017	723	1	-5.9566
2010003K11Rik	6	0.55175	0.76909	0.999991	16660	3	-5.5612	0.030499	0.033259	0.999017	724	1	-5.5612
mmu-mir-450b	4	0.25025	0.45374	0.999991	10722	2	-7.41	0.030546	0.031286	0.999017	725	1	-7.41
Prl7d1	6	0.096713	0.27417	0.999991	5795	2	-7.0911	0.030547	0.033298	0.999017	726	1	-7.0911
Anp32a	6	0.34187	0.61445	0.999991	13056	2	-3.8327	0.030596	0.03335	0.999017	727	1	-3.8327
Scgb1a1	6	0.41124	0.66672	0.999991	14296	3	-3.8508	0.030644	0.033392	0.999017	728	1	-3.8508
Pnma5	5	0.46325	0.68963	0.999991	15211	3	-7.4104	0.030648	0.032187	0.999017	729	1	-7.4104
Slc26a1	6	0.18568	0.41468	0.999991	8853	4	-7.8899	0.030692	0.033433	0.999017	730	1	-7.8899
Nudt17	5	0.42916	0.65777	0.999991	14639	3	-7.4831	0.030728	0.032263	0.999017	731	1	-7.4831
Skil	6	0.21857	0.46002	0.999991	9801	3	-7.445	0.030741	0.033482	0.999017	732	1	-7.445
Cmtm6	6	0.53216	0.755	0.999991	16375	3	-7.3429	0.030789	0.033525	0.999017	733	1	-7.3429
Uggt2	6	0.12893	0.33175	0.999991	7031	4	-5.3908	0.030837	0.033574	0.999017	734	1	-5.3908
Mta3	6	0.12911	0.33201	0.999991	7038	4	-7.9927	0.030885	0.033617	0.999017	735	1	-7.9927
Ostn	5	0.040944	0.13249	0.998679	2993	3	-4.9231	0.03097	0.032486	0.999017	736	1	-4.9231
Psmc5	6	0.9217	0.95553	0.999991	21172	1	-6.1442	0.030982	0.033707	0.999017	737	1	-6.1442
Cnn2	6	0.22456	0.46807	0.999991	9968	2	-6.4452	0.031175	0.033879	0.999017	738	1	-6.4452
Hras	6	0.060384	0.18909	0.999991	4006	2	-4.9132	0.03132	0.034014	0.999017	739	1	-4.9132
mmu-mir-345	4	0.62073	0.76122	0.999991	17709	1	-3.5277	0.031353	0.032066	0.999017	740	1	-3.5277
Wt1	5	0.18351	0.40462	0.999991	8796	4	-7.9233	0.031372	0.032867	0.999017	741	1	-7.9233
Gm10081	6	0.1968	0.43021	0.999991	9165	3	-7.1173	0.031464	0.034146	0.999017	742	1	-7.1173
Qrfp	6	0.37941	0.6431	0.999991	13751	2	-4.2941	0.031561	0.034245	0.999017	743	1	-4.2941
Gabpb2	6	0.36881	0.63524	0.999991	13543	3	-6.8026	0.031657	0.034341	0.999017	744	1	-6.8026
Naa25	6	0.99944	0.99944	0.999991	22493	0	-5.4002	0.031706	0.034388	0.999017	745	1	-5.4002
Olfr1449	6	0.2682	0.52483	0.999991	11201	4	-7.2039	0.031802	0.034485	0.999017	746	1	-7.2039
Esp18	5	0.66513	0.81109	0.999991	18326	2	-2.7176	0.031815	0.033291	0.999017	747	1	-2.7176
Art1	6	0.34615	0.61847	0.999991	13147	3	-4.9781	0.03185	0.034526	0.999017	748	1	-4.9781
Bet1l	6	0.97305	0.97538	0.999991	21858	1	-2.5589	0.031899	0.034571	0.999017	749	1	-2.5589
Slc16a1	6	0.94727	0.96331	0.999991	21459	1	-1.2002	0.031947	0.034618	0.999017	750	1	-1.2002
NonTargetingControlGuideForMouse_0339	2	0.088817	0.1527	0.999991	5450	1	-4.2972	0.032037	0.032007	0.999017	751	1	-4.2972
Heg1	6	0.47102	0.71055	0.999991	15383	3	-5.324	0.032043	0.034716	0.999017	752	1	-5.324
Cadm2	5	0.88626	0.9228	0.999991	20878	1	-4.265	0.032097	0.033542	0.999017	753	1	-4.265
Klf9	6	0.99164	0.99159	0.999991	22299	0	-4.892	0.032236	0.034901	0.999017	754	1	-4.892
Avl9	6	0.082979	0.24288	0.999991	5157	2	-6.5928	0.032284	0.034943	0.999017	755	1	-6.5928
Sult1c1	6	0.55085	0.76844	0.999991	16642	1	-6.0568	0.032333	0.034992	0.999017	756	1	-6.0568
Trim7	5	0.31769	0.54843	0.999991	12475	3	-7.1845	0.032338	0.03377	0.999017	757	1	-7.1845
Rhov	6	0.51796	0.74473	0.999991	16168	2	-5.3514	0.032381	0.035037	0.999017	758	1	-5.3514
mmu-mir-505	4	0.3424	0.55489	0.999991	13068	1	-5.1549	0.032384	0.033067	0.999017	759	1	-5.1549
Ralyl	6	0.87277	0.93842	0.999991	20696	1	-3.5941	0.032429	0.035091	0.999017	760	1	-3.5941
Gm11992	6	0.017054	0.071373	0.979113	1529	5	-8.2606	0.032477	0.035141	0.999017	761	1	-8.2606
Bcl2l11	6	0.19853	0.43262	0.999991	9220	2	-4.8732	0.032574	0.035235	0.999017	762	1	-4.8732
Dlgap2	5	0.13699	0.32458	0.999991	7304	4	-6.4771	0.032579	0.034005	0.999017	763	1	-6.4771
Rarres2	6	0.57954	0.78911	0.999991	17069	1	-3.5241	0.03267	0.035329	0.999017	764	1	-3.5241
Tacc2	6	0.12335	0.32327	0.999991	6865	2	-6.6186	0.032863	0.035515	0.999017	765	1	-6.6186
Slc28a2	6	0.32755	0.59769	0.999991	12707	3	-2.658	0.032911	0.035565	0.999017	766	1	-2.658
Laptm4b	6	0.069723	0.21181	0.999991	4515	4	-7.6035	0.032959	0.035616	0.999017	767	1	-7.6035
Pcdhb14	6	0.98998	0.98993	0.999991	22252	0	-4.682	0.033007	0.03566	0.999017	768	1	-4.682
Arhgap31	6	0.58053	0.78982	0.999991	17079	2	-6.8177	0.033056	0.035705	0.999017	769	1	-6.8177
mmu-mir-470	4	0.71919	0.82335	0.999991	18910	1	-3.0914	0.033093	0.033754	0.999017	770	1	-3.0914
Vsig8	6	0.6849	0.85403	0.999991	18532	1	-5.5008	0.033104	0.035748	0.999017	771	1	-5.5008
Phtf1	6	0.80748	0.90547	0.999991	19966	1	-5.7509	0.033152	0.035799	0.999017	772	1	-5.7509
Kif2a	6	0.59454	0.7999	0.999991	17307	2	-5.1369	0.033248	0.035886	0.999017	773	1	-5.1369
Dpp10	6	0.69623	0.85833	0.999991	18647	2	-4.8995	0.033441	0.036058	0.999017	774	1	-4.8995
Epb4.1l3	6	0.97894	0.97952	0.999991	21963	1	-6.1243	0.033489	0.0361	0.999017	775	1	-6.1243
Tmem126a	5	0.12681	0.30615	0.999991	6975	4	-7.8048	0.033544	0.034913	0.999017	776	1	-7.8048
Tmem211	6	0.067346	0.20607	0.999991	4401	5	-7.4857	0.033634	0.036238	0.999017	777	1	-7.4857
Cul1	6	0.076451	0.22781	0.999991	4843	4	-7.5975	0.033682	0.036275	0.999017	778	1	-7.5975
Dscaml1	6	0.56078	0.77559	0.999991	16788	2	-7.1568	0.03373	0.036321	0.999017	779	1	-7.1568
NonTargetingControlGuideForMouse_0820	1	0.96624	0.96642	0.999991	21722	0	-0.67883	0.033756	0.033654	0.999017	780	0	-0.67883
Slc10a2	6	0.11405	0.30898	0.999991	6529	3	-6.7355	0.033778	0.03636	0.999017	781	1	-6.7355
Sfr1	6	0.38617	0.6481	0.999991	13861	2	-6.974	0.033874	0.036463	0.999017	782	1	-6.974
Rhox2h	2	0.9187	0.91881	0.999991	21144	0	-2.7842	0.033921	0.033855	0.999017	783	1	-2.7842
Ick	6	0.15087	0.36468	0.999991	7778	4	-5.8506	0.033922	0.036511	0.999017	784	1	-5.8506
Asah2	6	0.18372	0.41191	0.999991	8804	4	-7.7829	0.033971	0.03656	0.999017	785	1	-7.7829
Krtap13-1	4	0.78214	0.8458	0.999991	19641	1	-4.3549	0.033995	0.034657	0.999017	786	1	-4.3549
Olfml2b	6	0.94354	0.96197	0.999991	21408	1	-3.6969	0.034019	0.036607	0.999017	787	1	-3.6969
Arl14ep	5	0.11504	0.28451	0.999991	6566	2	-6.3033	0.034026	0.035365	0.999017	788	1	-6.3033
Sprr1a	6	0.56783	0.78068	0.999991	16905	2	-3.0476	0.034067	0.036659	0.999017	789	1	-3.0476
Sds	6	0.075854	0.22641	0.999991	4823	5	-7.8933	0.034115	0.036706	0.999017	790	1	-7.8933
Fktn	6	0.99243	0.99238	0.999991	22321	0	-5.5083	0.034211	0.036791	0.999017	791	1	-5.5083
4930402F06Rik	5	0.80369	0.89571	0.999991	19911	2	-7.0926	0.034307	0.035641	0.999017	792	1	-7.0926
Nudt12	6	0.68094	0.85255	0.999991	18479	1	-4.3137	0.034308	0.036879	0.999017	793	1	-4.3137
Wbp1l	6	0.87132	0.93764	0.999991	20670	1	-6.1486	0.034356	0.036924	0.999017	794	1	-6.1486
mmu-mir-147	4	0.028601	0.088338	0.995842	2255	3	-8.6745	0.034381	0.035037	0.999017	795	1	-8.6745
Prkar1a	6	0.00050981	0.0026916	0.646607	83	3	-7.2881	0.034404	0.036971	0.999017	796	1	-7.2881
Mlec	5	0.88442	0.92217	0.999991	20853	1	-4.9106	0.034428	0.035748	0.999017	797	1	-4.9106
Wfdc18	6	0.63299	0.82706	0.999991	17875	3	-6.1465	0.0345	0.037055	0.999017	798	1	-6.1465
Coro2a	4	0.68147	0.80874	0.999991	18484	1	-4.5261	0.03451	0.03516	0.999017	799	1	-4.5261
Olfr1510	5	0.85294	0.91213	0.999991	20433	1	-5.3058	0.034548	0.035876	0.999017	800	1	-5.3058
Morn4	6	0.60795	0.80941	0.999991	17494	2	-5.016	0.034548	0.037096	0.999017	801	1	-5.016
Suv39h2	5	0.026366	0.095059	0.995842	2104	3	-7.4692	0.034588	0.03591	0.999017	802	1	-7.4692
Cyp4a12a	6	0.44382	0.69068	0.999991	14886	3	-7.3774	0.034644	0.037183	0.999017	803	1	-7.3774
Pdk3	6	0.62243	0.81962	0.999991	17729	2	-6.956	0.034789	0.037327	0.999017	804	1	-6.956
Npepl1	5	0.16273	0.3698	0.999991	8118	4	-7.4188	0.034869	0.036172	0.999017	805	1	-7.4188
Klhdc9	6	0.044021	0.14727	0.999991	3157	4	-7.8705	0.034885	0.037423	0.999017	806	1	-7.8705
Pbxip1	4	0.8852	0.89624	0.999991	20862	1	-3.4951	0.034896	0.035535	0.999017	807	1	-3.4951
7530416G11Rik	5	0.71419	0.83954	0.999991	18839	1	-6.1244	0.034909	0.036216	0.999017	808	1	-6.1244
Olfr1314	5	0.01883	0.070469	0.979113	1651	2	-7.2424	0.034949	0.036254	0.999017	809	1	-7.2424
Ogn	6	0.15291	0.36769	0.999991	7845	4	-7.8509	0.034981	0.037511	0.999017	810	1	-7.8509
Slc6a9	6	0.95344	0.96569	0.999991	21526	1	-5.5256	0.035077	0.037611	0.999017	811	1	-5.5256
Klhl14	6	0.62978	0.82479	0.999991	17824	3	-6.3836	0.035125	0.037658	0.999017	812	1	-6.3836
Cep152	6	0.17186	0.39508	0.999991	8437	2	-4.3618	0.035174	0.037699	0.999017	813	1	-4.3618
Elfn2	5	0.0088257	0.035289	0.953643	876	3	-7.7659	0.03519	0.036481	0.999017	814	1	-7.7659
Asf1b	6	0.93707	0.95989	0.999991	21330	1	-5.5899	0.035222	0.037755	0.999017	815	1	-5.5899
Gapt	6	0.43768	0.68616	0.999991	14786	2	-6.1921	0.035318	0.037849	0.999017	816	1	-6.1921
Grpr	5	0.4958	0.71962	0.999991	15832	2	-7.319	0.035351	0.036646	0.999017	817	1	-7.319
Tbx3	6	0.14079	0.34971	0.999991	7448	3	-7.1142	0.035366	0.037892	0.999017	818	1	-7.1142
S100a10	6	0.078421	0.23233	0.999991	4936	4	-8.0451	0.035462	0.037981	0.999017	819	1	-8.0451
Olfr740	6	0.18434	0.4128	0.999991	8822	2	-4.7027	0.03551	0.038025	0.999017	820	1	-4.7027
Rassf1	6	0.99885	0.99885	0.999991	22479	0	-4.721	0.035558	0.038077	0.999017	821	1	-4.721
NonTargetingControlGuideForMouse_0958	2	0.11717	0.19655	0.999991	6635	1	-4.3104	0.035576	0.035488	0.999017	822	1	-4.3104
Gdpd1	6	0.47059	0.71023	0.999991	15369	3	-7.3329	0.035606	0.038112	0.999017	823	1	-7.3329
Slc24a3	6	0.57858	0.7884	0.999991	17052	2	-6.6726	0.035702	0.038201	0.999017	824	1	-6.6726
Siae	6	0.21508	0.45539	0.999991	9694	3	-7.4589	0.035751	0.038241	0.999017	825	1	-7.4589
Pcx	6	0.46738	0.70789	0.999991	15291	3	-7.314	0.035847	0.03834	0.999017	826	1	-7.314
Gm14295	3	0.93173	0.93184	0.999991	21277	0	-1.2403	0.035918	0.036033	0.999017	827	1	-1.2403
Slco1a6	6	0.49844	0.73049	0.999991	15865	2	-6.7377	0.035943	0.038431	0.999017	828	1	-6.7377
Dvl2	5	0.0579	0.16987	0.999991	3871	4	-8.1317	0.035952	0.037224	0.999017	829	1	-8.1317
mmu-mir-707	4	0.86652	0.88503	0.999991	20600	1	-4.2767	0.035957	0.03658	0.999017	830	1	-4.2767
Rsl1d1	6	0.33432	0.60563	0.999991	12887	2	-5.543	0.036039	0.038519	0.999017	831	1	-5.543
Sh2d3c	6	0.57188	0.78355	0.999991	16969	2	-4.7486	0.036087	0.038562	0.999017	832	1	-4.7486
Syne3	6	0.096553	0.27384	0.999991	5789	3	-6.8771	0.036135	0.03861	0.999017	833	1	-6.8771
Gm9	6	0.083454	0.244	0.999991	5185	3	-5.2267	0.036183	0.038653	0.999017	834	1	-5.2267
Zgpat	6	0.11631	0.31248	0.999991	6612	3	-7.0997	0.036231	0.038689	0.999017	835	1	-7.0997
Mgat4b	6	0.89055	0.94843	0.999991	20926	1	-6.7045	0.036327	0.038786	0.999017	836	1	-6.7045
mmu-mir-448	4	0.67443	0.80323	0.999991	18418	2	-4.0233	0.036374	0.036971	0.999017	837	1	-4.0233
Armc1	6	0.8918	0.94872	0.999991	20938	1	-5.7607	0.036375	0.03883	0.999017	838	1	-5.7607
Zcwpw1	6	0.26046	0.51497	0.999991	10994	4	-7.7049	0.036471	0.03892	0.999017	839	1	-7.7049
Olfr1178	6	0.86968	0.93675	0.999991	20650	2	-6.4532	0.036519	0.038968	0.999017	840	1	-6.4532
NonTargetingControlGuideForMouse_0206	1	0.96345	0.96361	0.999991	21666	0	-0.78674	0.036547	0.036442	0.999017	841	0	-0.78674
Slc25a43	6	0.47976	0.71697	0.999991	15557	2	-6.07	0.036615	0.039055	0.999017	842	1	-6.07
Cd9	5	0.96652	0.96676	0.999991	21733	1	-2.1175	0.036754	0.03799	0.999017	843	1	-2.1175
Lef1	6	0.55551	0.77183	0.999991	16707	3	-6.7771	0.036808	0.039255	0.999017	844	1	-6.7771
Calm1	4	0.061277	0.17244	0.999991	4050	2	-7.4728	0.036824	0.037434	0.999017	845	1	-7.4728
Sssca1	6	0.15906	0.37662	0.999991	8016	3	-7.6022	0.036856	0.039294	0.999017	846	1	-7.6022
Dpf1	6	0.34894	0.62053	0.999991	13201	2	-6.2882	0.036904	0.039341	0.999017	847	1	-6.2882
Olfr521	6	0.65987	0.84465	0.999991	18273	2	-6.3304	0.037	0.039437	0.999017	848	1	-6.3304
Ceacam1	6	0.4769	0.71484	0.999991	15501	1	-3.012	0.037096	0.039533	0.999017	849	1	-3.012
Cdyl	6	0.013663	0.059501	0.979113	1253	5	-8.5367	0.037144	0.039576	0.999017	850	1	-8.5367
Tslp	5	0.10398	0.26343	0.999991	6116	4	-7.5753	0.037155	0.038362	0.999017	851	1	-7.5753
Alox5	6	0.14287	0.35291	0.999991	7534	4	-7.8137	0.037192	0.039616	0.999017	852	1	-7.8137
NonTargetingControlGuideForMouse_0435	2	0.95578	0.95591	0.999991	21566	0	-2.5539	0.03723	0.037153	0.999017	853	1	-2.5539
Olfr1000	5	0.27897	0.50861	0.999991	11500	3	-5.9626	0.037235	0.038449	0.999017	854	1	-5.9626
Olfr1058	6	0.01933	0.078225	0.987814	1685	5	-8.0575	0.03724	0.039667	0.999017	855	1	-8.0575
Olfr549	6	0.86672	0.93516	0.999991	20606	1	-3.8432	0.037288	0.039708	0.999017	856	1	-3.8432
4930562C15Rik	6	0.71687	0.8665	0.999991	18875	1	-4.33	0.037336	0.039758	0.999017	857	1	-4.33
Tmem79	6	0.26018	0.51461	0.999991	10980	3	-5.2207	0.037384	0.03981	0.999017	858	1	-5.2207
Slc35g1	6	0.99776	0.99772	0.999991	22450	0	-3.4467	0.037432	0.039853	0.999017	859	1	-3.4467
Npy1r	6	0.35786	0.62709	0.999991	13363	2	-6.4378	0.037576	0.03999	0.999017	860	1	-6.4378
Trim34b	1	0.96242	0.96259	0.999991	21656	0	-0.62257	0.037579	0.03747	0.999017	861	0	-0.62257
NonTargetingControlGuideForMouse_0617	2	0.99862	0.99862	0.999991	22475	0	-0.013464	0.037587	0.03751	0.999017	862	0	-0.013464
NonTargetingControlGuideForMouse_0601	1	0.9624	0.96258	0.999991	21654	0	-0.92605	0.037596	0.037484	0.999017	863	0	-0.92605
LOC100038947	6	0.80842	0.90592	0.999991	19978	2	-6.5813	0.037672	0.04008	0.999017	864	1	-6.5813
Exosc6	4	0.98177	0.98176	0.999991	22026	0	-5.3571	0.037691	0.03825	0.999017	865	1	-5.3571
Fbxl4	5	0.76057	0.8678	0.999991	19375	1	-3.2015	0.037715	0.0389	0.999017	866	1	-3.2015
Cyp3a41b	2	0.45385	0.51099	0.999991	15067	1	-3.9541	0.037749	0.037675	0.999017	867	0	-3.9541
Nprl3	6	0.1532	0.36809	0.999991	7857	3	-7.2877	0.037768	0.040173	0.999017	868	1	-7.2877
Lbr	6	0.30561	0.57137	0.999991	12178	3	-4.7498	0.037816	0.040216	0.999017	869	1	-4.7498
Efna3	5	0.79489	0.88988	0.999991	19788	2	-7.2598	0.037876	0.039049	0.999017	870	1	-7.2598
Olfr317	6	0.31122	0.57817	0.999991	12311	3	-7.5146	0.037912	0.040311	0.999017	871	1	-7.5146
NonTargetingControlGuideForMouse_0036	2	0.14828	0.24298	0.999991	7702	1	-4.3519	0.037927	0.037851	0.999017	872	0	-4.3519
Vmn1r223	6	0.526	0.75056	0.999991	16284	3	-7.1659	0.03796	0.040355	0.999017	873	1	-7.1659
Fdxacb1	6	0.5017	0.73289	0.999991	15916	3	-6.1432	0.038008	0.040402	0.999017	874	1	-6.1432
Jakmip1	6	0.013034	0.057061	0.979113	1208	1	-5.8423	0.038104	0.040504	0.999017	875	1	-5.8423
Arl9	5	0.1318	0.31516	0.999991	7112	2	-1.9347	0.038116	0.03926	0.999017	876	1	-1.9347
Smim12	6	0.21099	0.44976	0.999991	9580	2	-6.5219	0.038151	0.040557	0.999017	877	1	-6.5219
Ankrd27	5	0.98395	0.98402	0.999991	22093	0	-3.4766	0.038196	0.039327	0.999017	878	1	-3.4766
Npffr1	6	0.12057	0.31903	0.999991	6756	2	-6.5751	0.038199	0.0406	0.999017	879	1	-6.5751
Olfr763	6	0.59257	0.79851	0.999991	17277	2	-6.9757	0.038295	0.04069	0.999017	880	1	-6.9757
Pacs2	6	0.53703	0.75847	0.999991	16451	2	-4.0882	0.038343	0.040737	0.999017	881	1	-4.0882
Trim67	5	0.5705	0.75955	0.999991	16951	2	-2.8337	0.038436	0.039546	0.999017	882	1	-2.8337
Gab2	6	0.041504	0.14066	0.998809	3023	2	-6.1344	0.038439	0.040817	0.999017	883	1	-6.1344
Zfp426	5	0.68167	0.82051	0.999991	18489	2	-6.2883	0.038476	0.039579	0.999017	884	1	-6.2883
Kif1a	6	0.58245	0.79119	0.999991	17113	2	-6.8705	0.038487	0.040866	0.999017	885	1	-6.8705
Azin1	6	0.7559	0.8825	0.999991	19322	2	-3.6143	0.038535	0.040912	0.999017	886	1	-3.6143
Olfr704	6	0.14755	0.35978	0.999991	7675	4	-7.0265	0.038583	0.040952	0.999017	887	1	-7.0265
D8Ertd82e	6	0.93254	0.95855	0.999991	21293	1	-3.839	0.038727	0.041076	0.999017	888	1	-3.839
Grin1	6	0.33644	0.60811	0.999991	12926	2	-2.8387	0.038775	0.041117	0.999017	889	1	-2.8387
Tmem184a	6	0.43434	0.68373	0.999991	14723	3	-7.4621	0.038823	0.041165	0.999017	890	1	-7.4621
Ppp6r2	6	0.037456	0.12987	0.998679	2767	2	-3.9604	0.039015	0.041344	0.999017	891	1	-3.9604
Gchfr	6	0.63678	0.82973	0.999991	17926	3	-5.8055	0.039063	0.041384	0.999017	892	1	-5.8055
B3galt2	6	0.84085	0.92173	0.999991	20304	2	-4.9565	0.03911	0.041431	0.999017	893	1	-4.9565
Runx1t1	5	0.35457	0.58532	0.999991	13305	2	-6.4219	0.039116	0.040203	0.999017	894	1	-6.4219
Add3	6	0.21545	0.45589	0.999991	9718	4	-7.6734	0.039158	0.041475	0.999017	895	1	-7.6734
Cd24a	6	0.51067	0.73942	0.999991	16046	3	-5.9841	0.039206	0.041525	0.999017	896	1	-5.9841
Rhox4a	6	0.00012077	0.00067944	0.382302	38	5	-3.5985	0.039254	0.041568	0.999017	897	1	-3.5985
Apmap	6	0.86509	0.9343	0.999991	20582	1	-4.8754	0.039302	0.041608	0.999017	898	1	-4.8754
Ccr10	5	0.99637	0.99636	0.999991	22421	0	-3.5742	0.039316	0.040406	0.999017	899	1	-3.5742
Cypt3	6	0.70784	0.86291	0.999991	18759	2	-3.4141	0.039398	0.041697	0.999017	900	1	-3.4141
Uhrf2	6	0.088562	0.25571	0.999991	5441	4	-8.1736	0.039446	0.041749	0.999017	901	1	-8.1736
NonTargetingControlGuideForMouse_0360	2	0.53385	0.56746	0.999991	16402	1	-3.8736	0.039449	0.039365	0.999017	902	0	-3.8736
mmu-mir-377	4	0.31481	0.53523	0.999991	12404	2	-7.3168	0.039519	0.04	0.999017	903	1	-7.3168
Evc2	6	0.32569	0.5955	0.999991	12658	3	-7.0787	0.039542	0.041838	0.999017	904	1	-7.0787
Cks2	6	0.33296	0.60408	0.999991	12852	4	-7.3666	0.039638	0.041928	0.999017	905	1	-7.3666
Hps5	6	0.78626	0.89581	0.999991	19701	1	-3.6572	0.039685	0.041973	0.999017	906	1	-3.6572
mmu-mir-380	3	0.084617	0.19108	0.999991	5247	2	-4.1807	0.039709	0.03978	0.999017	907	1	-4.1807
Srsf10	5	0.56162	0.75498	0.999991	16804	1	-6.8406	0.039716	0.040796	0.999017	908	1	-6.8406
Slc17a4	6	0.0023932	0.011831	0.839272	289	5	-8.2953	0.039733	0.042016	0.999017	909	1	-8.2953
Rab25	6	0.86722	0.93542	0.999991	20618	1	-4.8971	0.039781	0.04206	0.999017	910	1	-4.8971
Pifo	5	0.79229	0.88816	0.999991	19771	2	-4.5515	0.039876	0.040948	0.999017	911	1	-4.5515
Rnh1	6	0.38962	0.65072	0.999991	13923	3	-7.4762	0.039877	0.042155	0.999017	912	1	-7.4762
Sdf2	6	0.027579	0.10234	0.995842	2183	4	-7.2394	0.040069	0.04234	0.999017	913	1	-7.2394
Cers2	5	0.10865	0.27243	0.999991	6332	4	-7.6206	0.040155	0.041241	0.999017	914	1	-7.6206
Fancf	3	0.21612	0.36515	0.999991	9740	2	-8.0821	0.040215	0.04028	0.999017	915	1	-8.0821
Gm4858	6	0.22282	0.46576	0.999991	9915	2	-6.8983	0.04026	0.042526	0.999017	916	1	-6.8983
Bfsp1	6	0.0063371	0.029521	0.926447	670	4	-8.3762	0.040308	0.042578	0.999017	917	1	-8.3762
Smyd1	6	0.99367	0.9936	0.999991	22355	0	-6.5015	0.040404	0.042675	0.999017	918	1	-6.5015
Cdnf	5	0.030724	0.10867	0.995842	2403	2	-6.7781	0.040435	0.041499	0.999017	919	1	-6.7781
Prdm8	6	0.55034	0.76806	0.999991	16633	3	-6.1726	0.040452	0.04272	0.999017	920	1	-6.1726
NonTargetingControlGuideForMouse_0835	2	0.35117	0.44446	0.999991	13251	1	-4.1547	0.040469	0.040407	0.999017	921	0	-4.1547
Hacl1	6	0.087784	0.25391	0.999991	5404	4	-7.1565	0.0405	0.042768	0.999017	922	1	-7.1565
Ubc	6	0.087409	0.25305	0.999991	5380	5	-7.6945	0.040547	0.042811	0.999017	923	1	-7.6945
Wdr41	5	0.99007	0.99011	0.999991	22256	0	-2.67	0.040555	0.041605	0.999017	924	1	-2.67
Nedd1	6	0.84731	0.92505	0.999991	20370	1	-5.504	0.040595	0.042861	0.999017	925	1	-5.504
NonTargetingControlGuideForMouse_0234	2	0.99712	0.99709	0.999991	22439	0	-0.40644	0.04063	0.040578	0.999017	926	0	-0.40644
Napepld	6	0.60502	0.80737	0.999991	17454	1	-6.2665	0.040643	0.042915	0.999017	927	1	-6.2665
Exog	4	0.20678	0.39475	0.999991	9451	2	-5.4921	0.040736	0.041162	0.999017	928	1	-5.4921
Olfr1105	6	0.081448	0.23931	0.999991	5082	3	-7.2536	0.040787	0.043056	0.999017	929	1	-7.2536
BC021614	6	0.0048234	0.022896	0.914136	532	3	-5.5006	0.040882	0.043136	0.999017	930	1	-5.5006
Rwdd2b	6	0.22075	0.46295	0.999991	9860	4	-7.6764	0.04093	0.04318	0.999017	931	1	-7.6764
Olfr520	6	0.0022194	0.011024	0.83069	271	4	-6.574	0.040978	0.043226	0.999017	932	1	-6.574
Adh1	5	0.34535	0.57623	0.999991	13132	2	-5.6114	0.040994	0.042031	0.999017	933	1	-5.6114
mmu-mir-5113	3	0.96577	0.96591	0.999991	21718	0	-0.77148	0.041035	0.041107	0.999017	934	1	-0.77148
Ate1	6	0.33081	0.60151	0.999991	12799	4	-7.5109	0.041074	0.043311	0.999017	935	1	-7.5109
Tmem138	5	0.61319	0.78237	0.999991	17598	2	-5.8906	0.041074	0.042106	0.999017	936	1	-5.8906
Fam172a	6	0.097282	0.27541	0.999991	5824	3	-7.1935	0.041122	0.043355	0.999017	937	1	-7.1935
Rxrb	6	0.55398	0.77071	0.999991	16686	3	-7.3857	0.041265	0.043478	0.999017	938	1	-7.3857
Tle1	5	0.71928	0.84252	0.999991	18911	2	-7.197	0.041394	0.042423	0.999017	939	1	-7.197
Samd12	6	0.84834	0.92555	0.999991	20390	2	-5.0202	0.041409	0.043601	0.999017	940	1	-5.0202
Tas2r123	6	0.089909	0.25875	0.999991	5490	4	-7.7819	0.041457	0.043648	0.999017	941	1	-7.7819
Myrfl	6	0.24797	0.49876	0.999991	10652	4	-7.6905	0.041504	0.043697	0.999017	942	1	-7.6905
Zfp937	5	0.2928	0.5229	0.999991	11856	2	-5.1242	0.041513	0.042529	0.999017	943	1	-5.1242
Rala	6	0.83919	0.92086	0.999991	20282	1	-3.727	0.041552	0.04374	0.999017	944	1	-3.727
Rbmx	5	0.32863	0.55946	0.999991	12742	2	-7.0195	0.041593	0.042596	0.999017	945	1	-7.0195
Olfr320	6	0.39702	0.65617	0.999991	14054	1	-1.9824	0.0416	0.043782	0.999017	946	1	-1.9824
NonTargetingControlGuideForMouse_0758	2	0.58024	0.60234	0.999991	17075	1	-3.8407	0.041633	0.041586	0.999017	947	0	-3.8407
Creb3l2	6	0.23193	0.47785	0.999991	10191	3	-7.5753	0.041648	0.043815	0.999017	948	1	-7.5753
Ifna2	6	0.6543	0.84198	0.999991	18194	2	-6.6524	0.041839	0.044002	0.999017	949	1	-6.6524
Star	6	0.72803	0.87097	0.999991	19008	2	-3.6409	0.041887	0.044041	0.999017	950	1	-3.6409
Ctss	5	0.61626	0.78405	0.999991	17642	2	-6.9731	0.041912	0.042899	0.999017	951	1	-6.9731
Bahcc1	6	0.77099	0.88911	0.999991	19493	2	-4.3812	0.041935	0.044083	0.999017	952	1	-4.3812
Cramp1l	5	0.77595	0.87758	0.999991	19558	2	-6.0695	0.041992	0.042972	0.999017	953	1	-6.0695
mmu-mir-5108	3	0.056979	0.13488	0.998679	3834	1	-5.7954	0.042022	0.042105	0.999017	954	1	-5.7954
Mgea5	6	0.66348	0.84599	0.999991	18309	2	-5.9983	0.04203	0.044184	0.999017	955	1	-5.9983
Gfod2	5	0.25847	0.48708	0.999991	10942	3	-7.7699	0.042152	0.043123	0.999017	956	1	-7.7699
Ntn1	6	0.84482	0.92376	0.999991	20340	2	-6.9324	0.042174	0.044325	0.999017	957	1	-6.9324
Ubap2l	6	0.97226	0.9749	0.999991	21842	1	-6.2935	0.042365	0.044502	0.999017	958	1	-6.2935
4931409K22Rik	6	0.37075	0.63665	0.999991	13588	3	-7.2657	0.042413	0.044547	0.999017	959	1	-7.2657
Helz2	6	0.7728	0.88985	0.999991	19518	2	-6.5789	0.042508	0.044646	0.999017	960	1	-6.5789
Syngr3	5	0.7481	0.86006	0.999991	19238	2	-0.96821	0.042551	0.0435	0.999017	961	1	-0.96821
NonTargetingControlGuideForMouse_0575	2	0.76456	0.76406	0.999991	19420	0	-0.99504	0.042555	0.042484	0.999017	962	0	-0.99504
Pcdh7	6	0.50583	0.73595	0.999991	15968	2	-7.2078	0.042556	0.044693	0.999017	963	1	-7.2078
Gck	5	0.13279	0.317	0.999991	7153	4	-8.0937	0.04259	0.043537	0.999017	964	1	-8.0937
mmu-mir-7009	3	0.88918	0.88928	0.999991	20914	0	-6.0858	0.0426	0.042671	0.999017	965	1	-6.0858
Hist2h2bb	6	0.65088	0.83963	0.999991	18147	2	-5.454	0.042604	0.044742	0.999017	966	1	-5.454
Wnt4	4	0.24995	0.45336	0.999991	10707	2	-7.6164	0.042624	0.042981	0.999017	967	1	-7.6164
Fosl2	5	0.89149	0.9247	0.999991	20935	1	-6.9827	0.04263	0.043577	0.999017	968	1	-6.9827
2410018M08Rik	6	0.1995	0.43394	0.999991	9249	3	-7.0032	0.042652	0.044785	0.999017	969	1	-7.0032
2310034C09Rik	6	0.32331	0.59274	0.999991	12608	4	-5.0972	0.0427	0.044836	0.999017	970	1	-5.0972
Rbpj	5	0.17459	0.3898	0.999991	8515	3	-5.1449	0.04271	0.043649	0.999017	971	1	-5.1449
Trf	6	0.65908	0.84436	0.999991	18259	2	-6.7431	0.042747	0.044877	0.999017	972	1	-6.7431
Dnah17	5	0.94915	0.9529	0.999991	21474	1	-1.289	0.04275	0.043692	0.999017	973	1	-1.289
Ankrd44	6	0.35959	0.62837	0.999991	13397	2	-5.4875	0.042795	0.04492	0.999017	974	1	-5.4875
Lzts2	5	0.77658	0.87799	0.999991	19560	2	-6.5142	0.04283	0.043771	0.999017	975	1	-6.5142
Polr3gl	6	0.21229	0.45157	0.999991	9616	1	-3.8865	0.042843	0.044965	0.999017	976	1	-3.8865
Kif23	6	0.91861	0.95474	0.999991	21142	1	-5.5445	0.042891	0.045015	0.999017	977	1	-5.5445
Cenpw	5	0.40075	0.63065	0.999991	14123	1	-5.6686	0.042909	0.043853	0.999017	978	1	-5.6686
Vmn2r24	6	0.79864	0.90137	0.999991	19844	1	-2.5786	0.042938	0.045059	0.999017	979	1	-2.5786
Chst7	5	0.29916	0.52949	0.999991	12013	2	-5.9915	0.042989	0.043923	0.999017	980	1	-5.9915
Cldn15	5	0.89847	0.92732	0.999991	20988	1	-4.9716	0.043029	0.043958	0.999017	981	1	-4.9716
Nap1l5	6	0.9449	0.96245	0.999991	21425	1	-3.827	0.043034	0.045149	0.999017	982	1	-3.827
S100a11	6	0.030374	0.11022	0.995842	2380	4	-6.6304	0.043082	0.045193	0.999017	983	1	-6.6304
Guca1b	6	0.47976	0.71697	0.999991	15555	1	-5.8907	0.04313	0.045235	0.999017	984	1	-5.8907
Cthrc1	6	0.25811	0.51198	0.999991	10932	2	-7.0342	0.043177	0.045277	0.999017	985	1	-7.0342
Rundc3b	5	0.70611	0.83476	0.999991	18738	2	-3.9719	0.043189	0.044106	0.999017	986	1	-3.9719
Rnf5	6	0.067273	0.20589	0.999991	4396	3	-6.3695	0.043225	0.045328	0.999017	987	1	-6.3695
Krtap10-4	6	0.19029	0.4211	0.999991	8985	3	-6.4185	0.043273	0.04537	0.999017	988	1	-6.4185
mmu-mir-674	3	0.7345	0.76802	0.999991	19080	1	-2.4195	0.043298	0.043363	0.999017	989	1	-2.4195
Stau1	6	0.56029	0.77524	0.999991	16782	2	-6.4621	0.043321	0.045416	0.999017	990	1	-6.4621
NonTargetingControlGuideForMouse_0536	2	0.94531	0.94536	0.999991	21432	0	-2.7871	0.04333	0.043247	0.999017	991	0	-2.7871
Znrf2	6	0.48644	0.72187	0.999991	15672	2	-6.6332	0.043416	0.045501	0.999017	992	1	-6.6332
P2ry10	6	0.25461	0.50743	0.999991	10853	2	-5.357	0.043464	0.045545	0.999017	993	1	-5.357
Camsap3	6	0.0030633	0.014933	0.849724	367	4	-6.8435	0.043512	0.045595	0.999017	994	1	-6.8435
Olfr1271	6	0.05489	0.17523	0.999991	3724	1	-6.1449	0.043559	0.045644	0.999017	995	1	-6.1449
Nipal3	5	0.33761	0.56856	0.999991	12960	2	-5.5572	0.043587	0.044498	0.999017	996	1	-5.5572
Gm20738	6	0.00054867	0.0029071	0.651208	91	4	-3.4799	0.043607	0.045687	0.999017	997	1	-3.4799
NonTargetingControlGuideForMouse_0087	2	0.2021	0.31954	0.999991	9331	1	-4.3726	0.043653	0.043583	0.999017	998	0	-4.3726
Tmx2	6	0.005998	0.028038	0.926447	635	5	-8.3925	0.043655	0.045732	0.999017	999	1	-8.3925
Cd83	6	0.38336	0.64601	0.999991	13805	3	-7.0343	0.043703	0.045774	0.999017	1000	1	-7.0343
mmu-mir-6335	4	0.65804	0.79029	0.999991	18246	2	-7.3118	0.043711	0.044049	0.999017	1001	1	-7.3118
Klhl41	6	0.34618	0.61849	0.999991	13150	2	-7.0211	0.04375	0.045817	0.999017	1002	1	-7.0211
Rufy4	6	0.98275	0.98276	0.999991	22056	1	-6.1383	0.043798	0.045855	0.999017	1003	1	-6.1383
Olfr1189	5	0.98952	0.98958	0.999991	22236	0	-6.3721	0.043826	0.044744	0.999017	1004	1	-6.3721
Epha4	6	0.031155	0.11242	0.995842	2428	4	-6.4751	0.043846	0.045894	0.999017	1005	1	-6.4751
C2cd4c	6	0.015764	0.067504	0.979113	1425	3	-6.9022	0.043893	0.045943	0.999017	1006	1	-6.9022
Rasgrp2	5	0.81016	0.90006	0.999991	19999	1	-6.7946	0.043985	0.044891	0.999017	1007	1	-6.7946
Ticam2	6	0.74025	0.87599	0.999991	19138	2	-6.15	0.043989	0.046029	0.999017	1008	1	-6.15
Chrna1	6	0.10265	0.28719	0.999991	6071	4	-8.007	0.044037	0.046077	0.999017	1009	1	-8.007
Foxr1	6	0.99499	0.99496	0.999991	22384	0	-4.4604	0.044084	0.046113	0.999017	1010	1	-4.4604
Ackr3	6	0.09876	0.2787	0.999991	5894	2	-4.2329	0.044132	0.046158	0.999017	1011	1	-4.2329
Gm4906	6	0.051689	0.16713	0.999991	3535	4	-8.3246	0.04418	0.046205	0.999017	1012	1	-8.3246
Pphln1	5	0.99219	0.9922	0.999991	22312	0	-6.0177	0.044224	0.045111	0.999017	1013	1	-6.0177
Btg1	6	0.2875	0.54915	0.999991	11726	4	-5.7576	0.044228	0.046248	0.999017	1014	1	-5.7576
Rab43	5	0.037375	0.12442	0.998679	2765	3	-8.3443	0.044304	0.04519	0.999017	1015	1	-8.3443
Olfr485	6	0.20661	0.44371	0.999991	9445	2	-6.7263	0.044323	0.046333	0.999017	1016	1	-6.7263
Prkcsh	6	0.023748	0.091254	0.995842	1936	5	-7.9245	0.044371	0.046382	0.999017	1017	1	-7.9245
Aox4	6	0.64388	0.83471	0.999991	18037	3	-7.3117	0.044466	0.046479	0.999017	1018	1	-7.3117
Vmn2r30	4	0.00037983	0.001444	0.517602	70	2	-4.3042	0.044541	0.044874	0.999017	1019	1	-4.3042
Olfr531	6	0.10415	0.29048	0.999991	6129	4	-7.773	0.044561	0.046575	0.999017	1020	1	-7.773
Lsm12	6	0.2274	0.4718	0.999991	10046	4	-7.6653	0.044609	0.046611	0.999017	1021	1	-7.6653
NonTargetingControlGuideForMouse_0692	2	0.75101	0.7506	0.999991	19273	0	-3.6304	0.044638	0.044612	0.999017	1022	0	-3.6304
NonTargetingControlGuideForMouse_0055	2	0.31172	0.42038	0.999991	12321	1	-2.6101	0.044654	0.04463	0.999017	1023	0	-2.6101
Fam134a	6	0.10918	0.30128	0.999991	6353	2	-5.0978	0.044657	0.046654	0.999017	1024	1	-5.0978
Myoz2	6	0.60055	0.80416	0.999991	17395	2	-6.3616	0.044705	0.046701	0.999017	1025	1	-6.3616
Lelp1	6	0.14569	0.35705	0.999991	7611	4	-6.1026	0.044752	0.046745	0.999017	1026	1	-6.1026
Dennd4c	6	0.016968	0.071113	0.979113	1518	5	-8.6134	0.044848	0.046839	0.999017	1027	1	-8.6134
Rnf170	6	0.02158	0.084902	0.995842	1803	2	-4.742	0.044895	0.046881	0.999017	1028	1	-4.742
Spink4	6	0.23886	0.48688	0.999991	10373	3	-6.5439	0.044943	0.046922	0.999017	1029	1	-6.5439
Mtmr3	5	0.7874	0.88497	0.999991	19712	1	-6.0838	0.045021	0.045895	0.999017	1030	1	-6.0838
Olfr411	6	0.99737	0.99733	0.999991	22441	0	-1.6314	0.045038	0.047011	0.999017	1031	1	-1.6314
Ptpre	6	0.059419	0.18671	0.999991	3952	3	-5.107	0.045134	0.047103	0.999017	1032	1	-5.107
Eif4h	6	0.23382	0.48031	0.999991	10251	2	-6.2788	0.045181	0.047149	0.999017	1033	1	-6.2788
Vmn1r42	6	0.020704	0.082274	0.994152	1752	2	-5.3779	0.045229	0.047196	0.999017	1034	1	-5.3779
Dhrs9	6	0.080308	0.23664	0.999991	5026	4	-5.8122	0.045324	0.047271	0.999017	1035	1	-5.8122
Fam134b	6	0.070215	0.21298	0.999991	4541	3	-6.9582	0.045372	0.047314	0.999017	1036	1	-6.9582
Wipi2	6	0.16164	0.3804	0.999991	8089	2	-3.647	0.04542	0.047354	0.999017	1037	1	-3.647
Pcdhgb6	1	0.95454	0.95466	0.999991	21548	0	-1.2134	0.045458	0.045429	0.999017	1038	0	-1.2134
Casp7	5	0.14951	0.34688	0.999991	7732	2	-6.6853	0.045458	0.046325	0.999017	1039	1	-6.6853
NonTargetingControlGuideForMouse_0647	2	0.91683	0.91695	0.999991	21126	0	-0.67877	0.045461	0.045439	0.999017	1040	0	-0.67877
Krtap9-5	6	0.2908	0.55323	0.999991	11802	3	-6.0545	0.045515	0.047436	0.999017	1041	1	-6.0545
Wdfy2	5	0.15242	0.35197	0.999991	7831	3	-7.455	0.045578	0.046439	0.999017	1042	1	-7.455
Ankrd2	6	0.20224	0.4377	0.999991	9336	3	-7.4258	0.04561	0.04753	0.999017	1043	1	-7.4258
Gtpbp2	6	0.58232	0.7911	0.999991	17110	1	-6.7001	0.045706	0.047625	0.999017	1044	1	-6.7001
Pycr2	6	0.9648	0.97081	0.999991	21702	1	-5.4097	0.045753	0.047669	0.999017	1045	1	-5.4097
Mrgprb8	6	0.82449	0.91358	0.999991	20137	2	-4.4551	0.045801	0.047717	0.999017	1046	1	-4.4551
Ace2	6	0.64572	0.83602	0.999991	18062	3	-4.5456	0.045849	0.047757	0.999017	1047	1	-4.5456
mmu-mir-3075	4	0.90069	0.90654	0.999991	21006	1	-7.1349	0.045881	0.046164	0.999017	1048	1	-7.1349
Gbp10	6	0.43421	0.68363	0.999991	14721	2	-6.2355	0.046039	0.047947	0.999017	1049	1	-6.2355
mmu-mir-126a	4	0.017307	0.056109	0.979113	1549	3	-8.7265	0.046072	0.046357	0.999017	1050	1	-8.7265
Hoxc4	6	0.98644	0.9864	0.999991	22156	0	-6.3029	0.046135	0.048037	0.999017	1051	1	-6.3029
Eml6	6	0.87803	0.94133	0.999991	20766	2	-6.3665	0.04623	0.048118	0.999017	1052	1	-6.3665
Akna	6	0.21185	0.45092	0.999991	9604	2	-2.8346	0.046277	0.048161	0.999017	1053	1	-2.8346
Cyp3a25	6	0.26336	0.51867	0.999991	11074	3	-5.7703	0.046325	0.048198	0.999017	1054	1	-5.7703
Chst2	6	0.70571	0.86208	0.999991	18735	2	-3.677	0.046373	0.048247	0.999017	1055	1	-3.677
Mkl1	6	0.89592	0.94955	0.999991	20968	1	-6.4995	0.04642	0.048292	0.999017	1056	1	-6.4995
Spon1	6	0.93718	0.95992	0.999991	21332	1	-4.4356	0.046468	0.048329	0.999017	1057	1	-4.4356
Tstd1	6	0.54197	0.76204	0.999991	16522	2	-5.1992	0.046516	0.048384	0.999017	1058	1	-5.1992
Ginm1	5	0.34606	0.57691	0.999991	13144	2	-6.6095	0.046532	0.047347	0.999017	1059	1	-6.6095
Cep164	6	0.04831	0.15848	0.999991	3372	5	-8.3948	0.046563	0.048432	0.999017	1060	1	-8.3948
Sh2d4a	6	0.43915	0.68722	0.999991	14808	2	-5.9542	0.046611	0.048477	0.999017	1061	1	-5.9542
Olfr605	6	0.077841	0.23101	0.999991	4911	4	-7.8107	0.046706	0.04857	0.999017	1062	1	-7.8107
Rarg	5	0.42675	0.6555	0.999991	14584	3	-7.3975	0.046731	0.04753	0.999017	1063	1	-7.3975
Hilpda	6	0.6491	0.83839	0.999991	18115	3	-6.7957	0.046801	0.048655	0.999017	1064	1	-6.7957
Plekha1	6	0.033303	0.11843	0.995842	2560	3	-5.5223	0.046849	0.048707	0.999017	1065	1	-5.5223
Btk	5	0.6195	0.78576	0.999991	17694	2	-7.1063	0.04685	0.047643	0.999017	1066	1	-7.1063
E130309D14Rik	6	0.14655	0.35834	0.999991	7639	3	-7.8026	0.046897	0.04875	0.999017	1067	1	-7.8026
Slc34a1	4	0.55464	0.71052	0.999991	16700	1	-0.83564	0.046933	0.04717	0.999017	1068	1	-0.83564
Slco1b2	6	0.54804	0.7664	0.999991	16598	2	-6.2929	0.046944	0.0488	0.999017	1069	1	-6.2929
Irx6	5	0.54227	0.74493	0.999991	16527	2	-7.2099	0.046969	0.047768	0.999017	1070	1	-7.2099
Siglec15	6	0.54276	0.76261	0.999991	16532	1	-6.7204	0.047135	0.048975	0.999017	1071	1	-6.7204
Zcchc13	6	0.47667	0.71467	0.999991	15498	3	-7.4699	0.047182	0.049018	0.999017	1072	1	-7.4699
Prss38	5	0.55421	0.75112	0.999991	16689	2	-7.2058	0.047207	0.04799	0.999017	1073	1	-7.2058
Tgm7	6	0.70095	0.8602	0.999991	18697	2	-5.5331	0.047277	0.049096	0.999017	1074	1	-5.5331
mmu-mir-1897	2	0.9868	0.98677	0.999991	22169	0	-1.9717	0.047316	0.047266	0.999017	1075	0	-1.9717
Ifnab	6	0.10333	0.28869	0.999991	6095	4	-8.1444	0.047325	0.049138	0.999017	1076	1	-8.1444
Ccdc97	6	0.4195	0.67291	0.999991	14454	3	-4.6226	0.047372	0.049188	0.999017	1077	1	-4.6226
Adamts2	5	0.41708	0.64632	0.999991	14409	3	-7.5115	0.047406	0.048187	0.999017	1078	1	-7.5115
Pld5	6	0.11625	0.31239	0.999991	6610	3	-7.674	0.04742	0.04923	0.999017	1079	1	-7.674
Nek11	5	0.51981	0.73345	0.999991	16196	2	-6.2692	0.047446	0.048229	0.999017	1080	1	-6.2692
Spice1	6	0.39935	0.65792	0.999991	14098	3	-7.2144	0.047515	0.049325	0.999017	1081	1	-7.2144
Akap4	5	0.02629	0.094821	0.995842	2095	2	-7.1704	0.047565	0.048349	0.999017	1082	1	-7.1704
Cftr	6	0.10021	0.28187	0.999991	5952	3	-7.5106	0.04761	0.049413	0.999017	1083	1	-7.5106
Cyp2a12	6	0.2274	0.4718	0.999991	10045	4	-7.6443	0.047706	0.049497	0.999017	1084	1	-7.6443
Ccl6	6	0.20118	0.43623	0.999991	9302	3	-7.5354	0.047753	0.049537	0.999017	1085	1	-7.5354
Rock1	6	0.21466	0.45485	0.999991	9681	3	-6.4731	0.047801	0.049593	0.999017	1086	1	-6.4731
Tkt	6	0.44567	0.69208	0.999991	14912	3	-6.3028	0.047896	0.049689	0.999017	1087	1	-6.3028
Pced1b	6	0.98278	0.98279	0.999991	22059	1	-6.8968	0.047943	0.049738	0.999017	1088	1	-6.8968
Sh2b2	5	0.10086	0.25747	0.999991	5987	4	-7.7337	0.048002	0.048768	0.999017	1089	1	-7.7337
Pias4	6	0.016656	0.070197	0.979113	1495	4	-8.0087	0.048038	0.049816	0.999017	1090	1	-8.0087
Ccdc19	5	0.084382	0.22496	0.999991	5229	3	-8.3348	0.048081	0.048849	0.999017	1091	1	-8.3348
Tspyl4	6	0.046531	0.15387	0.999991	3276	5	-7.9451	0.048086	0.049868	0.999017	1092	1	-7.9451
Defb28	5	0.026007	0.093924	0.995842	2081	1	-5.6681	0.048121	0.048891	0.999017	1093	1	-5.6681
Olfr242	6	0.0063502	0.029572	0.926447	671	3	-2.7686	0.048134	0.049913	0.999017	1094	1	-2.7686
Dclre1a	6	0.47706	0.71496	0.999991	15504	1	-4.1734	0.048229	0.05	0.999017	1095	1	-4.1734
Wdr45b	4	0.99001	0.98995	0.999991	22255	0	-3.4036	0.048239	0.048458	0.999017	1096	1	-3.4036
Zswim4	6	0.59033	0.79691	0.999991	17238	2	-7.1375	0.048276	0.050049	0.999017	1097	1	-7.1375
Ugt2a1	6	0.020256	0.08097	0.989994	1730	4	-2.4893	0.048371	0.050142	0.999017	1098	1	-2.4893
Cntn6	6	0.027545	0.10225	0.995842	2181	4	-8.528	0.048419	0.050186	0.999017	1099	1	-8.528
Fgf11	6	0.067608	0.20668	0.999991	4414	4	-7.2329	0.048514	0.050283	0.999017	1100	1	-7.2329
Tctn3	6	0.57928	0.78893	0.999991	17064	3	-6.8347	0.048561	0.050329	0.999017	1101	1	-6.8347
Ttc9c	6	0.82094	0.91186	0.999991	20104	2	-3.0151	0.048609	0.050369	0.999017	1102	1	-3.0151
P2ry4	6	0.21718	0.45814	0.999991	9762	2	-6.2817	0.048657	0.050418	0.999017	1103	1	-6.2817
NonTargetingControlGuideForMouse_0017	2	0.96359	0.96369	0.999991	21670	0	-2.6344	0.048686	0.04861	0.999017	1104	0	-2.6344
Apc	6	0.076651	0.22827	0.999991	4858	3	-7.1966	0.048752	0.050502	0.999017	1105	1	-7.1966
Olfr3	6	0.80317	0.90343	0.999991	19902	2	-6.5371	0.048799	0.050547	0.999017	1106	1	-6.5371
Tle3	4	0.94314	0.94302	0.999991	21403	0	-5.2955	0.048811	0.049007	0.999017	1107	1	-5.2955
Sgpp1	6	0.32072	0.58962	0.999991	12555	3	-7.5687	0.048847	0.050582	0.999017	1108	1	-7.5687
Sp1	6	0.32038	0.58919	0.999991	12545	3	-7.3589	0.048894	0.050628	0.999017	1109	1	-7.3589
mmu-mir-7003	4	0.92533	0.92597	0.999991	21215	1	-2.9998	0.048939	0.049134	0.999017	1110	1	-2.9998
Bag1	6	0.86371	0.93355	0.999991	20561	2	-3.8681	0.048942	0.050671	0.999017	1111	1	-3.8681
Cabyr	5	0.17176	0.38509	0.999991	8436	3	-7.778	0.049033	0.049764	0.999017	1112	1	-7.778
Slc25a44	6	0.83976	0.92115	0.999991	20290	1	-4.9058	0.049037	0.050769	0.999017	1113	1	-4.9058
mmu-mir-192	4	0.25619	0.46161	0.999991	10881	2	-4.7064	0.049066	0.049261	0.999017	1114	1	-4.7064
Tyro3	5	0.98655	0.98655	0.999991	22160	0	-5.5965	0.049113	0.04984	0.999017	1115	1	-5.5965
Scimp	6	0.19884	0.43304	0.999991	9230	4	-7.8597	0.049132	0.05087	0.999017	1116	1	-7.8597
Hif3a	6	0.13384	0.33931	0.999991	7195	3	-7.3104	0.049179	0.050912	0.999017	1117	1	-7.3104
2410015M20Rik	6	0.21509	0.45542	0.999991	9704	3	-7.5694	0.049274	0.050999	0.999017	1118	1	-7.5694
Igsf21	6	0.30616	0.57203	0.999991	12192	4	-7.4843	0.049322	0.051044	0.999017	1119	1	-7.4843
Zfp358	5	0.77787	0.87882	0.999991	19574	1	-6.2593	0.049351	0.050064	0.999017	1120	1	-6.2593
Tas2r117	6	0.084448	0.24627	0.999991	5233	4	-8.0364	0.049417	0.051124	0.999017	1121	1	-8.0364
Erbb2ip	5	0.043093	0.13733	0.998679	3113	4	-8.5393	0.04943	0.050132	0.999017	1122	1	-8.5393
Galnt18	6	0.016949	0.071054	0.979113	1515	2	-5.7081	0.049512	0.051212	0.999017	1123	1	-5.7081
Vmn2r57	6	0.99038	0.99034	0.999991	22260	0	-4.8097	0.049559	0.051254	0.999017	1124	1	-4.8097
Abcd1	6	0.0084677	0.038522	0.962693	841	4	-5.9538	0.049654	0.05134	0.999017	1125	1	-5.9538
Tcerg1l	5	0.38028	0.61068	0.999991	13764	2	-1.3661	0.049787	0.050476	0.999017	1126	1	-1.3661
Slc43a1	6	0.21463	0.4548	0.999991	9677	2	-5.1371	0.049797	0.051474	0.999017	1127	1	-5.1371
Aoc1	6	0.71063	0.86403	0.999991	18793	1	-4.6155	0.049892	0.051563	0.999017	1128	1	-4.6155
Olfr918	6	0.43542	0.68453	0.999991	14751	2	-5.9438	0.049939	0.0516	0.999017	1129	1	-5.9438
Rbmxl2	6	0.77447	0.89059	0.999991	19539	2	-6.4129	0.049987	0.051647	0.999017	1130	1	-6.4129
Ctu1	6	0.36475	0.63224	0.999991	13473	3	-7.217	0.050034	0.051692	0.999017	1131	1	-7.217
NonTargetingControlGuideForMouse_0404	2	0.2573	0.38826	0.999991	10909	1	-4.3824	0.050119	0.050064	0.999017	1132	0	-4.3824
Wscd2	6	0.032501	0.11618	0.995842	2515	3	-4.2393	0.050129	0.051778	0.999017	1133	1	-4.2393
Casq1	6	0.11983	0.3179	0.999991	6730	3	-5.4891	0.050224	0.051861	0.999017	1134	1	-5.4891
Pmp2	6	0.039933	0.13653	0.998679	2921	4	-7.4934	0.050272	0.051903	0.999017	1135	1	-7.4934
Ngfr	6	0.99088	0.99083	0.999991	22277	0	-6.1495	0.050319	0.051952	0.999017	1136	1	-6.1495
Gpha2	6	0.15134	0.36537	0.999991	7795	2	-4.3508	0.050414	0.052044	0.999017	1137	1	-4.3508
Zfp563	5	0.36464	0.59533	0.999991	13469	1	-4.4367	0.050421	0.051072	0.999017	1138	1	-4.4367
Dennd2c	5	0.53362	0.7405	0.999991	16400	1	-7.226	0.05046	0.05111	0.999017	1139	1	-7.226
Slbp	6	0.38013	0.64361	0.999991	13763	2	-6.379	0.050461	0.052091	0.999017	1140	1	-6.379
Cdk16	6	0.11071	0.3038	0.999991	6415	4	-7.9216	0.050509	0.052141	0.999017	1141	1	-7.9216
Gpatch4	6	0.55092	0.76849	0.999991	16643	3	-7.3475	0.050604	0.052237	0.999017	1142	1	-7.3475
Snca	6	0.11196	0.30574	0.999991	6456	2	-6.7841	0.050651	0.052281	0.999017	1143	1	-6.7841
Zswim3	6	0.041429	0.14046	0.998679	3017	3	-7.6202	0.050746	0.052367	0.999017	1144	1	-7.6202
Cox20	4	0.052681	0.15133	0.999991	3599	3	-8.139	0.05091	0.051102	0.999017	1145	1	-8.139
Pou2f2	6	0.41925	0.67269	0.999991	14449	2	-4.0028	0.050983	0.052592	0.999017	1146	1	-4.0028
Zfp788	5	0.098122	0.25215	0.999991	5863	2	-6.4624	0.051015	0.05167	0.999017	1147	1	-6.4624
Mgme1	5	0.71751	0.84146	0.999991	18887	2	-2.4516	0.051054	0.051707	0.999017	1148	1	-2.4516
NonTargetingControlGuideForMouse_0436	2	0.37477	0.4593	0.999991	13679	1	-4.2413	0.051197	0.051138	0.999017	1149	0	-4.2413
Dgki	6	0.30768	0.5739	0.999991	12229	3	-7.4475	0.05122	0.052829	0.999017	1150	1	-7.4475
Olfr199	5	0.55324	0.75059	0.999991	16676	2	-7.2988	0.051252	0.051903	0.999017	1151	1	-7.2988
Idua	5	0.069792	0.19491	0.999991	4520	1	-2.1293	0.051411	0.052059	0.999017	1152	1	-2.1293
Six5	6	0.30153	0.56645	0.999991	12083	4	-7.4614	0.051458	0.053057	0.999017	1153	1	-7.4614
1700026L06Rik	6	0.65313	0.84118	0.999991	18178	2	-2.6098	0.051505	0.053108	0.999017	1154	1	-2.6098
Sim2	5	0.66514	0.8111	0.999991	18327	1	-4.0701	0.051609	0.052254	0.999017	1155	1	-4.0701
Rps6ka1	6	0.68747	0.85497	0.999991	18557	2	-7.0815	0.051647	0.053266	0.999017	1156	1	-7.0815
Ap2s1	5	0.24746	0.47558	0.999991	10639	3	-7.8759	0.051688	0.052329	0.999017	1157	1	-7.8759
Sema6c	6	0.19223	0.42379	0.999991	9039	4	-7.789	0.051695	0.053307	0.999017	1158	1	-7.789
Krt23	6	0.057994	0.18314	0.999991	3875	3	-7.5864	0.051742	0.053352	0.999017	1159	1	-7.5864
4921507P07Rik	6	0.75466	0.88198	0.999991	19310	2	-5.9427	0.051789	0.053404	0.999017	1160	1	-5.9427
Fbxw17	6	0.47224	0.71144	0.999991	15414	3	-7.1294	0.051837	0.053451	0.999017	1161	1	-7.1294
Lrrc8b	4	0.21964	0.41256	0.999991	9827	1	-5.5377	0.051894	0.052067	0.999017	1162	1	-5.5377
P2ry1	5	0.29117	0.52123	0.999991	11810	3	-7.7762	0.051925	0.052558	0.999017	1163	1	-7.7762
mmu-mir-8112	3	0.97357	0.97368	0.999991	21868	0	-5.7495	0.051931	0.05208	0.999017	1164	1	-5.7495
Cdkn1b	6	0.21629	0.457	0.999991	9741	1	-6.2714	0.051932	0.053561	0.999017	1165	1	-6.2714
Rab44	6	0.99795	0.9979	0.999991	22454	0	-6.2043	0.051979	0.05361	0.999017	1166	1	-6.2043
Zfp871	6	0.11217	0.30604	0.999991	6467	2	-4.9689	0.052121	0.053744	0.999017	1167	1	-4.9689
Efcab14	6	0.0086153	0.039155	0.962693	854	5	-7.7221	0.052169	0.05379	0.999017	1168	1	-7.7221
NonTargetingControlGuideForMouse_0525	2	0.59078	0.61039	0.999991	17242	1	-3.9897	0.052179	0.052106	0.999017	1169	0	-3.9897
Gm10220	3	0.93941	0.93962	0.999991	21361	0	-2.3869	0.052194	0.052336	0.999017	1170	1	-2.3869
Cdc25c	5	0.15206	0.35138	0.999991	7819	3	-8.1128	0.052202	0.052823	0.999017	1171	1	-8.1128
Tpr	6	0.79864	0.90137	0.999991	19845	1	-5.9789	0.052216	0.053837	0.999017	1172	1	-5.9789
Polm	6	0.4586	0.70153	0.999991	15141	1	-4.3973	0.052311	0.053916	0.999017	1173	1	-4.3973
Fam154b	6	0.70095	0.8602	0.999991	18696	1	-7.0788	0.052405	0.054007	0.999017	1174	1	-7.0788
Pgm2l1	6	0.17394	0.398	0.999991	8498	4	-5.6998	0.052453	0.054051	0.999017	1175	1	-5.6998
E230025N22Rik	6	0.40743	0.66392	0.999991	14243	2	-6.1915	0.0525	0.054102	0.999017	1176	1	-6.1915
Pqlc1	6	0.13576	0.34218	0.999991	7270	3	-7.5247	0.052595	0.054188	0.999017	1177	1	-7.5247
Ikzf3	5	0.74222	0.85637	0.999991	19162	2	-3.9958	0.052637	0.053232	0.999017	1178	1	-3.9958
Cd14	6	0.99742	0.99739	0.999991	22442	0	-4.102	0.052642	0.054228	0.999017	1179	1	-4.102
Vmn1r158	4	0.70539	0.81894	0.999991	18733	1	-3.0336	0.052655	0.052812	0.999017	1180	1	-3.0336
Gm10375	2	0.76424	0.76374	0.999991	19414	0	-3.6707	0.052661	0.05261	0.999017	1181	0	-3.6707
Terf2ip	4	0.97979	0.9798	0.999991	21981	0	-3.9346	0.052719	0.052872	0.999017	1182	1	-3.9346
Olfr613	6	0.8789	0.94183	0.999991	20776	2	-5.9959	0.052737	0.054312	0.999017	1183	1	-5.9959
Aadacl2	6	0.23574	0.4828	0.999991	10300	3	-7.4712	0.052784	0.054361	0.999017	1184	1	-7.4712
AU015228	5	0.52163	0.73439	0.999991	16219	1	-5.3967	0.052795	0.053375	0.999017	1185	1	-5.3967
Col12a1	6	0.391	0.65172	0.999991	13948	2	-5.0941	0.052879	0.054447	0.999017	1186	1	-5.0941
Adck2	5	0.039351	0.12889	0.998679	2885	4	-8.4499	0.052954	0.053528	0.999017	1187	1	-8.4499
Psg20	6	0.90188	0.95081	0.999991	21013	1	-5.001	0.053068	0.054623	0.999017	1188	1	-5.001
Tmem25	6	0.98592	0.98587	0.999991	22147	0	-1.018	0.053116	0.054669	0.999017	1189	1	-1.018
Kcnj3	4	0.24291	0.44398	0.999991	10501	2	-6.351	0.053163	0.053308	0.999017	1190	1	-6.351
Gtf2ird1	6	0.63895	0.83126	0.999991	17960	2	-3.0871	0.053163	0.054714	0.999017	1191	1	-3.0871
Ido1	6	0.99046	0.99042	0.999991	22264	0	-2.807	0.053211	0.054756	0.999017	1192	1	-2.807
Timd4	6	0.39237	0.65276	0.999991	13974	3	-7.2913	0.053258	0.054799	0.999017	1193	1	-7.2913
NonTargetingControlGuideForMouse_0926	2	0.98057	0.98057	0.999991	22004	0	-2.3297	0.053272	0.053233	0.999017	1194	0	-2.3297
Atp13a2	6	0.51211	0.74046	0.999991	16074	2	-6.8158	0.053305	0.054841	0.999017	1195	1	-6.8158
Eps8l2	6	0.15724	0.37399	0.999991	7963	2	-6.1636	0.053353	0.054882	0.999017	1196	1	-6.1636
Gm13286	5	0.047587	0.14734	0.999991	3336	3	-8.5096	0.053388	0.053965	0.999017	1197	1	-8.5096
Pcbd1	6	0.079903	0.23569	0.999991	5008	3	-5.4173	0.0534	0.054929	0.999017	1198	1	-5.4173
Spon2	6	0.64127	0.83286	0.999991	17994	3	-7.0873	0.053495	0.055014	0.999017	1199	1	-7.0873
Nipa1	6	0.28209	0.54232	0.999991	11580	3	-7.1632	0.053542	0.055059	0.999017	1200	1	-7.1632
Draxin	5	0.41481	0.64412	0.999991	14366	2	-6.568	0.053586	0.054169	0.999017	1201	1	-6.568
Sla2	6	0.4923	0.72602	0.999991	15766	1	-2.917	0.053637	0.055145	0.999017	1202	1	-2.917
Rpl14	6	0.98229	0.98232	0.999991	22040	1	-4.5498	0.053684	0.055187	0.999017	1203	1	-4.5498
Shank1	6	0.093854	0.26775	0.999991	5684	3	-6.6933	0.053826	0.05532	0.999017	1204	1	-6.6933
Timp4	6	0.32712	0.5972	0.999991	12697	4	-5.274	0.053873	0.055363	0.999017	1205	1	-5.274
Paip2b	5	0.98395	0.98402	0.999991	22094	0	-3.5018	0.053941	0.054539	0.999017	1206	1	-3.5018
Fbxo47	6	0.56781	0.78066	0.999991	16901	3	-6.6689	0.053968	0.055461	0.999017	1207	1	-6.6689
Mapk12	5	0.16874	0.37998	0.999991	8338	3	-7.9938	0.053981	0.054581	0.999017	1208	1	-7.9938
Vmn1r171	6	0.25016	0.50164	0.999991	10717	4	-5.2254	0.054015	0.055506	0.999017	1209	1	-5.2254
Sytl4	5	0.35001	0.58079	0.999991	13229	2	-5.5747	0.054099	0.054691	0.999017	1210	1	-5.5747
Spock3	6	0.08682	0.25171	0.999991	5354	3	-6.6751	0.05411	0.055604	0.999017	1211	1	-6.6751
Vps16	6	0.40868	0.66485	0.999991	14265	2	-7.1371	0.054157	0.055645	0.999017	1212	1	-7.1371
Gimap8	6	0.86321	0.93329	0.999991	20555	1	-2.5801	0.054204	0.055689	0.999017	1213	1	-2.5801
Hbb-bh1	6	0.68444	0.85386	0.999991	18522	2	-6.7288	0.054252	0.055733	0.999017	1214	1	-6.7288
Smpx	6	0.22848	0.47324	0.999991	10083	4	-7.632	0.054346	0.055824	0.999017	1215	1	-7.632
Slc5a4b	6	0.91657	0.95421	0.999991	21122	1	-2.7269	0.054393	0.055872	0.999017	1216	1	-2.7269
Slc9a4	4	0.11383	0.25832	0.999991	6517	2	-5.1121	0.054399	0.054515	0.999017	1217	1	-5.1121
NonTargetingControlGuideForMouse_0787	2	0.94133	0.94146	0.999991	21386	0	-2.999	0.054412	0.054372	0.999017	1218	0	-2.999
Ddx27	6	0.040021	0.13674	0.998679	2928	1	-3.7422	0.054488	0.055949	0.999017	1219	1	-3.7422
Npas3	5	0.41889	0.64806	0.999991	14440	3	-2.9203	0.054534	0.055104	0.999017	1220	1	-2.9203
Sdk2	6	0.32694	0.59698	0.999991	12686	3	-7.5159	0.054535	0.055988	0.999017	1221	1	-7.5159
Tmem151b	4	0.91031	0.91371	0.999991	21074	1	-5.0656	0.054557	0.054663	0.999017	1222	1	-5.0656
Hrh1	6	0.1691	0.39116	0.999991	8352	2	-3.215	0.054583	0.056024	0.999017	1223	1	-3.215
mmu-mir-1943	4	0.89398	0.90198	0.999991	20951	1	-6.1239	0.054589	0.054696	0.999017	1224	1	-6.1239
Isl2	6	0.67184	0.84912	0.999991	18393	2	-5.2224	0.05463	0.05607	0.999017	1225	1	-5.2224
Ranbp3l	6	0.12357	0.32359	0.999991	6881	2	-3.5171	0.054677	0.056114	0.999017	1226	1	-3.5171
Enho	5	0.29872	0.52902	0.999991	12000	3	-7.3877	0.054692	0.055259	0.999017	1227	1	-7.3877
Gm13139	3	0.14884	0.29297	0.999991	7720	2	-3.1638	0.054774	0.054956	0.999017	1228	1	-3.1638
Bax	6	0.16849	0.39025	0.999991	8323	2	-5.8126	0.054866	0.056304	0.999017	1229	1	-5.8126
Olfr441	6	0.31983	0.58852	0.999991	12524	4	-7.4964	0.054914	0.056358	0.999017	1230	1	-7.4964
Basp1	5	0.99855	0.99857	0.999991	22472	0	-2.8513	0.054929	0.05548	0.999017	1231	1	-2.8513
NonTargetingControlGuideForMouse_0162	1	0.94507	0.94526	0.999991	21428	0	-1.1264	0.05493	0.054865	0.999017	1232	0	-1.1264
Slc16a3	6	0.98631	0.98627	0.999991	22153	0	-5.8562	0.054961	0.056406	0.999017	1233	1	-5.8562
Myoc	6	0.3182	0.58659	0.999991	12489	2	-6.4995	0.055008	0.056467	0.999017	1234	1	-6.4995
Tdpoz1	6	0.31351	0.58093	0.999991	12365	3	-5.9834	0.055103	0.056558	0.999017	1235	1	-5.9834
Trim43b	6	0.40978	0.66564	0.999991	14280	3	-5.9229	0.055197	0.05665	0.999017	1236	1	-5.9229
Zfp128	5	0.12253	0.29826	0.999991	6842	1	-5.2001	0.055205	0.055754	0.999017	1237	1	-5.2001
Cd302	6	0.68125	0.85267	0.999991	18482	2	-6.9108	0.055244	0.056694	0.999017	1238	1	-6.9108
Ftsj3	6	0.3591	0.62801	0.999991	13389	3	-4.4249	0.055292	0.056746	0.999017	1239	1	-4.4249
Prkca	5	0.51345	0.73023	0.999991	16092	1	-5.7893	0.055323	0.05587	0.999017	1240	1	-5.7893
Vamp1	6	0.29239	0.55516	0.999991	11837	3	-4.3906	0.055339	0.056793	0.999017	1241	1	-4.3906
Btg2	6	0.4058	0.66266	0.999991	14215	3	-5.4218	0.055386	0.056838	0.999017	1242	1	-5.4218
Usp22	6	0.25399	0.50665	0.999991	10839	2	-2.5851	0.055433	0.05689	0.999017	1243	1	-2.5851
5730559C18Rik	5	0.12238	0.298	0.999991	6833	1	-6.7225	0.055441	0.055995	0.999017	1244	1	-6.7225
Vtcn1	6	0.43502	0.68422	0.999991	14742	3	-7.4766	0.055481	0.056932	0.999017	1245	1	-7.4766
Usp53	6	0.094558	0.26932	0.999991	5713	4	-7.9304	0.055528	0.056975	0.999017	1246	1	-7.9304
Hebp1	5	0.047899	0.14802	0.999991	3350	4	-8.4961	0.055599	0.056156	0.999017	1247	1	-8.4961
Smpd5	6	0.87769	0.94115	0.999991	20761	2	-6.2778	0.055622	0.057065	0.999017	1248	1	-6.2778
NonTargetingControlGuideForMouse_0514	2	0.98427	0.98426	0.999991	22099	0	-1.5728	0.055633	0.055592	0.999017	1249	0	-1.5728
Olfr1173	6	0.51168	0.74014	0.999991	16063	3	-7.1683	0.055717	0.057147	0.999017	1250	1	-7.1683
Gm14725	6	0.47428	0.71294	0.999991	15451	2	-7.0267	0.055764	0.05719	0.999017	1251	1	-7.0267
Olfr315	6	0.61222	0.81243	0.999991	17574	2	-6.4472	0.055859	0.05727	0.999017	1252	1	-6.4472
Cyp2c37	6	0.020219	0.080858	0.989994	1727	3	-6.2197	0.055906	0.05732	0.999017	1253	1	-6.2197
Treml4	5	0.65196	0.8037	0.999991	18157	1	-2.1575	0.056033	0.056557	0.999017	1254	1	-2.1575
Arpc1a	6	0.99759	0.99757	0.999991	22446	0	-3.4782	0.056048	0.057464	0.999017	1255	1	-3.4782
Guk1	6	0.095324	0.27108	0.999991	5733	3	-6.3935	0.056142	0.057554	0.999017	1256	1	-6.3935
Chrm5	5	0.94088	0.94767	0.999991	21382	1	-3.9553	0.056151	0.056676	0.999017	1257	1	-3.9553
Stox1	4	0.76156	0.83813	0.999991	19389	1	-4.6124	0.056171	0.056243	0.999017	1258	1	-4.6124
Pnpo	6	0.25673	0.51023	0.999991	10892	3	-6.897	0.056189	0.057592	0.999017	1259	1	-6.897
Lrp4	6	0.56261	0.77691	0.999991	16824	1	-5.1002	0.056236	0.057631	0.999017	1260	1	-5.1002
Gm4559	6	0.41604	0.67026	0.999991	14386	3	-5.5541	0.056284	0.057675	0.999017	1261	1	-5.5541
Robo1	6	0.45013	0.6954	0.999991	14997	2	-5.8434	0.056331	0.057721	0.999017	1262	1	-5.8434
Sema5a	6	0.99648	0.99644	0.999991	22424	0	-4.1684	0.056472	0.057855	0.999017	1263	1	-4.1684
Btg4	6	0.20239	0.43791	0.999991	9341	3	-5.6779	0.05652	0.057902	0.999017	1264	1	-5.6779
Elk3	5	0.31147	0.54208	0.999991	12312	1	-0.91282	0.056546	0.05707	0.999017	1265	1	-0.91282
Adcyap1r1	6	0.86609	0.93482	0.999991	20594	1	-6.4401	0.056756	0.05813	0.999017	1266	1	-6.4401
Kcne3	6	0.08926	0.25726	0.999991	5467	2	-6.9217	0.05685	0.058216	0.999017	1267	1	-6.9217
Pgk1	6	0.82488	0.91378	0.999991	20143	2	-5.6747	0.056897	0.058259	0.999017	1268	1	-5.6747
Pglyrp1	5	0.83912	0.90825	0.999991	20279	1	-5.5054	0.0569	0.057411	0.999017	1269	1	-5.5054
mmu-mir-1188	3	0.87044	0.8706	0.999991	20663	1	-6.6728	0.056919	0.057079	0.999017	1270	0	-6.6728
Lmbrd2	6	0.83413	0.91834	0.999991	20240	1	-6.2964	0.056944	0.058305	0.999017	1271	1	-6.2964
Dnase2a	6	0.035534	0.12466	0.998679	2676	3	-5.7481	0.056992	0.058351	0.999017	1272	1	-5.7481
Llgl1	6	0.58962	0.79641	0.999991	17228	1	-4.3401	0.057039	0.058393	0.999017	1273	1	-4.3401
Vmn1r34	6	0.17958	0.40607	0.999991	8666	3	-6.4081	0.057086	0.05844	0.999017	1274	1	-6.4081
4930468A15Rik	6	0.12338	0.32332	0.999991	6869	4	-7.4416	0.057133	0.058478	0.999017	1275	1	-7.4416
Mak16	5	0.71512	0.84007	0.999991	18854	2	-5.3017	0.057137	0.057645	0.999017	1276	1	-5.3017
Myoz3	6	0.13343	0.33867	0.999991	7179	2	-6.6919	0.057228	0.058567	0.999017	1277	1	-6.6919
Mchr1	6	0.68517	0.85413	0.999991	18534	2	-5.4511	0.057275	0.05861	0.999017	1278	1	-5.4511
NonTargetingControlGuideForMouse_0840	2	0.48577	0.53303	0.999991	15661	1	-4.175	0.057301	0.057256	0.999017	1279	0	-4.175
Plp1	6	0.73354	0.87322	0.999991	19064	2	-5.6939	0.057369	0.058713	0.999017	1280	1	-5.6939
Krtap11-1	5	0.18279	0.40343	0.999991	8769	4	-7.8266	0.057373	0.057866	0.999017	1281	1	-7.8266
Tmem27	5	0.57997	0.76449	0.999991	17072	2	-7.218	0.057412	0.057903	0.999017	1282	1	-7.218
Trim72	6	0.075846	0.22639	0.999991	4821	3	-5.5373	0.057605	0.058942	0.999017	1283	1	-5.5373
Ebf1	6	0.60252	0.80559	0.999991	17429	3	-3.4398	0.057652	0.058987	0.999017	1284	1	-3.4398
Anxa4	5	0.43491	0.66315	0.999991	14739	3	-7.4703	0.057688	0.058162	0.999017	1285	1	-7.4703
Prr3	6	0.98012	0.98044	0.999991	21991	1	-5.7514	0.057699	0.05903	0.999017	1286	1	-5.7514
Als2cr11	6	0.06405	0.1981	0.999991	4210	4	-7.0113	0.057746	0.059075	0.999017	1287	1	-7.0113
Prkag1	5	0.20497	0.43015	0.999991	9406	2	-6.7518	0.057767	0.058238	0.999017	1288	1	-6.7518
Olfr460	6	0.54468	0.76399	0.999991	16552	2	-6.8445	0.057793	0.059126	0.999017	1289	1	-6.8445
Rassf9	6	0.1836	0.41175	0.999991	8801	2	-5.0996	0.057841	0.059173	0.999017	1290	1	-5.0996
Hpgds	5	0.89914	0.92758	0.999991	20993	1	-2.6184	0.057924	0.058395	0.999017	1291	1	-2.6184
Crygs	6	0.30598	0.57182	0.999991	12187	2	-7.219	0.057935	0.059273	0.999017	1292	1	-7.219
mmu-mir-7026	4	0.90472	0.90949	0.999991	21041	1	-6.6614	0.057941	0.057948	0.999017	1293	1	-6.6614
Aqr	6	0.9738	0.97586	0.999991	21871	1	-3.9632	0.058029	0.059364	0.999017	1294	1	-3.9632
Vwa5a	6	0.20524	0.44184	0.999991	9416	2	-6.7658	0.058076	0.059412	0.999017	1295	1	-6.7658
Itgb4	5	0.13608	0.32295	0.999991	7278	3	-8.0886	0.058121	0.058576	0.999017	1296	1	-8.0886
Slc17a3	6	0.55274	0.76982	0.999991	16668	3	-7.4247	0.058123	0.059451	0.999017	1297	1	-7.4247
Olfr609	6	0.99116	0.99112	0.999991	22286	0	-2.3471	0.058171	0.059492	0.999017	1298	1	-2.3471
Daam2	6	0.039925	0.13651	0.998679	2920	4	-7.6564	0.058312	0.05962	0.999017	1299	1	-7.6564
Taf10	6	0.39785	0.65679	0.999991	14066	2	-5.225	0.058359	0.059661	0.999017	1300	1	-5.225
Mettl7a1	6	0.58125	0.79031	0.999991	17095	1	-5.937	0.058406	0.059706	0.999017	1301	1	-5.937
Olfr539	4	0.093799	0.22679	0.999991	5676	3	-8.193	0.058478	0.058472	0.999017	1302	1	-8.193
Gm14430	4	0.016333	0.053171	0.979113	1474	2	-4.1585	0.058573	0.058557	0.999017	1303	1	-4.1585
Cd70	5	0.39832	0.62831	0.999991	14079	1	-4.9499	0.058633	0.059061	0.999017	1304	1	-4.9499
Rhox2f	3	0.024013	0.061167	0.979113	1955	2	-3.9037	0.058705	0.058863	0.999017	1305	0	-3.9037
Bmper	5	0.73402	0.85138	0.999991	19072	2	-0.95638	0.058751	0.059168	0.999017	1306	1	-0.95638
Aimp2	6	0.50999	0.73893	0.999991	16038	1	-1.8342	0.058783	0.060072	0.999017	1307	1	-1.8342
Otud6b	6	0.88997	0.94811	0.999991	20922	1	-5.9785	0.05883	0.060114	0.999017	1308	1	-5.9785
Ces1c	5	0.14236	0.33429	0.999991	7514	3	-8.0565	0.058869	0.059279	0.999017	1309	1	-8.0565
Grik2	6	0.15572	0.37177	0.999991	7922	2	-6.5786	0.058877	0.06016	0.999017	1310	1	-6.5786
H3f3a	5	0.97142	0.97148	0.999991	21819	0	-5.2955	0.058908	0.059319	0.999017	1311	1	-5.2955
Klk6	6	0.24825	0.49913	0.999991	10665	3	-6.2035	0.058972	0.060244	0.999017	1312	1	-6.2035
Camta1	5	0.31021	0.54078	0.999991	12288	3	-7.6587	0.058987	0.059403	0.999017	1313	1	-7.6587
Chrna5	6	0.053116	0.17072	0.999991	3615	4	-7.7496	0.059066	0.060329	0.999017	1314	1	-7.7496
Il15ra	6	0.02566	0.096783	0.995842	2059	1	-5.4814	0.059113	0.060377	0.999017	1315	1	-5.4814
Neurod6	6	0.65946	0.84451	0.999991	18264	2	-4.1364	0.05916	0.060423	0.999017	1316	1	-4.1364
Ctf1	6	0.26494	0.52069	0.999991	11116	3	-7.2508	0.059207	0.060469	0.999017	1317	1	-7.2508
Clpp	6	0.41562	0.66993	0.999991	14377	3	-5.3482	0.059254	0.060511	0.999017	1318	1	-5.3482
Ndufa12	6	0.46426	0.70561	0.999991	15232	2	-5.7554	0.059301	0.060558	0.999017	1319	1	-5.7554
mmu-mir-125b-2	4	0.89532	0.9029	0.999991	20957	1	-3.0645	0.059394	0.059321	0.999017	1320	1	-3.0645
Ensa	6	0.74084	0.87623	0.999991	19144	2	-3.1497	0.059395	0.060654	0.999017	1321	1	-3.1497
Kcnj10	6	0.071101	0.21512	0.999991	4600	4	-7.7691	0.059584	0.060835	0.999017	1322	1	-7.7691
Invs	5	0.44353	0.67119	0.999991	14877	3	-7.454	0.059616	0.060028	0.999017	1323	1	-7.454
Hmgcll1	6	0.1719	0.39515	0.999991	8438	3	-6.198	0.059631	0.060875	0.999017	1324	1	-6.198
NonTargetingControlGuideForMouse_0611	2	0.92402	0.92411	0.999991	21197	0	-1.5203	0.059641	0.059556	0.999017	1325	0	-1.5203
Wfdc15a	6	0.38875	0.65008	0.999991	13907	2	-5.1313	0.059678	0.060919	0.999017	1326	1	-5.1313
Cox5b	5	0.73449	0.85166	0.999991	19079	2	-4.8185	0.059694	0.060106	0.999017	1327	1	-4.8185
Ccdc67	6	0.013053	0.057128	0.979113	1210	5	-8.1734	0.059819	0.061058	0.999017	1328	1	-8.1734
Ptbp2	6	0.017144	0.07164	0.979113	1535	3	-5.8085	0.059913	0.061155	0.999017	1329	1	-5.8085
Vmn2r96	6	0.25752	0.51123	0.999991	10920	2	-6.336	0.05996	0.061196	0.999017	1330	1	-6.336
Ccng1	5	0.26821	0.49737	0.999991	11203	2	-6.6327	0.059969	0.060377	0.999017	1331	1	-6.6327
2410004B18Rik	6	0.78065	0.89333	0.999991	19619	2	-3.2505	0.060007	0.061234	0.999017	1332	1	-3.2505
Gstt2	6	0.0032553	0.015782	0.850019	387	4	-7.4844	0.060102	0.061328	0.999017	1333	1	-7.4844
Ngef	6	0.064563	0.19933	0.999991	4238	3	-6.2236	0.060149	0.061379	0.999017	1334	1	-6.2236
4932438H23Rik	5	0.7527	0.86283	0.999991	19290	2	-5.2001	0.060166	0.060584	0.999017	1335	1	-5.2001
BC048679	5	0.96652	0.96676	0.999991	21732	1	-3.0515	0.060284	0.060693	0.999017	1336	1	-3.0515
Sirt5	6	0.32582	0.59564	0.999991	12662	1	-4.3678	0.06029	0.061521	0.999017	1337	1	-4.3678
Aco1	6	0.29412	0.55731	0.999991	11885	3	-7.3912	0.060337	0.061568	0.999017	1338	1	-7.3912
Asah1	6	0.68052	0.85239	0.999991	18477	1	-5.0234	0.060384	0.061617	0.999017	1339	1	-5.0234
Bcl11b	5	0.42283	0.65176	0.999991	14518	3	-7.4975	0.060402	0.060801	0.999017	1340	1	-7.4975
Man1b1	6	0.98802	0.98798	0.999991	22201	0	-5.203	0.060431	0.061661	0.999017	1341	1	-5.203
mmu-mir-208b	4	0.60582	0.7496	0.999991	17465	2	-6.7625	0.060434	0.060328	0.999017	1342	1	-6.7625
mmu-mir-3112	3	0.80918	0.8181	0.999991	19986	1	-0.88202	0.060465	0.060593	0.999017	1343	0	-0.88202
Cpne2	6	0.12794	0.33026	0.999991	7005	1	-4.2067	0.060572	0.06181	0.999017	1344	1	-4.2067
Gm21950	6	0.72233	0.86867	0.999991	18947	1	-7.1726	0.060619	0.061859	0.999017	1345	1	-7.1726
1110008F13Rik	6	0.97325	0.97551	0.999991	21861	1	-6.6271	0.060666	0.0619	0.999017	1346	1	-6.6271
Wnt10b	5	0.47245	0.69812	0.999991	15415	2	-6.6544	0.060677	0.061066	0.999017	1347	1	-6.6544
Fbxo39	6	0.27872	0.53812	0.999991	11497	2	-4.8303	0.060713	0.061938	0.999017	1348	1	-4.8303
Inpp5j	5	0.18302	0.40381	0.999991	8779	2	-7.2988	0.060755	0.06114	0.999017	1349	1	-7.2988
Calm5	6	0.23315	0.47946	0.999991	10229	4	-3.7477	0.06076	0.061988	0.999017	1350	1	-3.7477
Thbs4	6	0.25348	0.50597	0.999991	10822	3	-7.6226	0.060807	0.06203	0.999017	1351	1	-7.6226
Glra4	5	0.7414	0.85587	0.999991	19157	1	-4.3143	0.060873	0.061253	0.999017	1352	1	-4.3143
Olfr1241	6	0.54484	0.76411	0.999991	16554	1	-3.7635	0.060995	0.062215	0.999017	1353	1	-3.7635
NonTargetingControlGuideForMouse_0147	2	0.90266	0.90262	0.999991	21023	0	-3.4172	0.061018	0.060929	0.999017	1354	0	-3.4172
Acot6	6	0.22758	0.47205	0.999991	10055	2	-6.5049	0.061042	0.062262	0.999017	1355	1	-6.5049
mmu-mir-683-1	4	0.4484	0.63164	0.999991	14956	2	-4.3219	0.061065	0.060953	0.999017	1356	1	-4.3219
Gpr125	6	0.93729	0.95995	0.999991	21335	1	-5.9472	0.061089	0.062307	0.999017	1357	1	-5.9472
Lrrc41	6	0.15906	0.37662	0.999991	8014	4	-7.8736	0.061136	0.062346	0.999017	1358	1	-7.8736
Gm2382	5	0.12705	0.30658	0.999991	6978	3	-3.3663	0.061148	0.061551	0.999017	1359	1	-3.3663
Epb4.1l1	6	0.046734	0.15439	0.999991	3291	5	-7.7884	0.06123	0.062435	0.999017	1360	1	-7.7884
H2-M10.1	5	0.69239	0.8268	0.999991	18611	2	-6.0461	0.061266	0.061659	0.999017	1361	1	-6.0461
Sgk2	5	0.060245	0.17487	0.999991	4000	3	-4.3296	0.061305	0.061696	0.999017	1362	1	-4.3296
Tmem254a	6	0.19678	0.43018	0.999991	9163	4	-3.2331	0.061418	0.062622	0.999017	1363	1	-3.2331
Zfp53	5	0.099548	0.25493	0.999991	5925	3	-8.2777	0.061423	0.061805	0.999017	1364	1	-8.2777
Tram1l1	5	0.99708	0.99709	0.999991	22438	0	-3.4803	0.061462	0.061841	0.999017	1365	1	-3.4803
Phactr4	6	0.2919	0.55455	0.999991	11823	4	-7.4952	0.061465	0.062669	0.999017	1366	1	-7.4952
Mrgprx1	4	0.30691	0.5266	0.999991	12214	2	-7.3416	0.061506	0.061393	0.999017	1367	1	-7.3416
Snx22	6	0.44679	0.69291	0.999991	14931	3	-4.2016	0.061512	0.062717	0.999017	1368	1	-4.2016
Sass6	6	0.71061	0.86403	0.999991	18792	2	-3.6011	0.061559	0.062759	0.999017	1369	1	-3.6011
Cep41	6	0.66417	0.84622	0.999991	18314	1	-6.132	0.061653	0.062855	0.999017	1370	1	-6.132
4930430D24Rik	5	0.0040075	0.016796	0.858815	457	4	-8.8246	0.061658	0.062041	0.999017	1371	1	-8.8246
Dao	5	0.05023	0.15309	0.999991	3459	3	-5.1021	0.061737	0.062114	0.999017	1372	1	-5.1021
Pcdh8	6	0.12349	0.32346	0.999991	6877	2	-4.2591	0.061747	0.062943	0.999017	1373	1	-4.2591
2610018G03Rik	6	0.53125	0.75435	0.999991	16361	2	-5.2125	0.061794	0.06299	0.999017	1374	1	-5.2125
6030498E09Rik	5	0.5118	0.72943	0.999991	16068	2	-7.1612	0.061815	0.062198	0.999017	1375	1	-7.1612
Epb4.1l4a	6	0.9623	0.96961	0.999991	21648	1	-6.413	0.061841	0.063035	0.999017	1376	1	-6.413
Zbtb7c	6	0.12448	0.32499	0.999991	6910	2	-6.0727	0.061888	0.063077	0.999017	1377	1	-6.0727
Hk1	6	0.14324	0.35344	0.999991	7544	3	-7.448	0.061935	0.063126	0.999017	1378	1	-7.448
Sept10	5	0.76769	0.87232	0.999991	19466	1	-3.5742	0.061972	0.062343	0.999017	1379	1	-3.5742
Olfr574	6	0.09876	0.2787	0.999991	5892	3	-5.3591	0.062029	0.063203	0.999017	1380	1	-5.3591
mmu-mir-181b-1	3	0.11389	0.24683	0.999991	6519	2	-8.4161	0.062033	0.062122	0.999017	1381	0	-8.4161
NonTargetingControlGuideForMouse_0296	2	0.2249	0.35064	0.999991	9972	1	-2.4638	0.062058	0.061967	0.999017	1382	0	-2.4638
Fkbp10	6	0.20152	0.43673	0.999991	9312	4	-7.7697	0.062076	0.063254	0.999017	1383	1	-7.7697
Zfp64	6	0.88735	0.94657	0.999991	20896	1	-5.961	0.062123	0.063299	0.999017	1384	1	-5.961
Cttn	6	0.73405	0.87342	0.999991	19073	2	-6.9322	0.06217	0.06334	0.999017	1385	1	-6.9322
Nans	5	0.15068	0.34894	0.999991	7771	3	-8.1065	0.062207	0.062567	0.999017	1386	1	-8.1065
Pou1f1	6	0.1505	0.36413	0.999991	7768	2	-5.5998	0.062217	0.063391	0.999017	1387	1	-5.5998
Slx1b	5	0.082754	0.22171	0.999991	5143	1	-7.2493	0.062247	0.062599	0.999017	1388	1	-7.2493
Tlr13	6	0.34597	0.61833	0.999991	13143	3	-5.7821	0.062264	0.063445	0.999017	1389	1	-5.7821
Rab23	6	0.73208	0.87261	0.999991	19049	2	-5.846	0.062358	0.06354	0.999017	1390	1	-5.846
Sstr3	5	0.075545	0.2069	0.999991	4809	3	-7.8266	0.062403	0.062746	0.999017	1391	1	-7.8266
NonTargetingControlGuideForMouse_0583	1	0.9376	0.9378	0.999991	21337	0	-1.0357	0.062403	0.062368	0.999017	1392	0	-1.0357
Tssk6	6	0.50631	0.73629	0.999991	15977	3	-7.064	0.062405	0.063589	0.999017	1393	1	-7.064
Gm1965	6	0.029845	0.10872	0.995842	2348	2	-6.7683	0.062452	0.063633	0.999017	1394	1	-6.7683
Egfl6	6	0.39885	0.65755	0.999991	14086	3	-6.0831	0.062546	0.063721	0.999017	1395	1	-6.0831
Fscn1	6	0.98936	0.98931	0.999991	22231	0	-6.8072	0.062593	0.063763	0.999017	1396	1	-6.8072
Clec2h	5	0.23341	0.46065	0.999991	10239	2	-2.855	0.062599	0.062924	0.999017	1397	1	-2.855
Mpp6	6	0.20372	0.43975	0.999991	9372	4	-6.857	0.06264	0.063801	0.999017	1398	1	-6.857
2010005H15Rik	6	0.080522	0.23716	0.999991	5035	4	-8.0104	0.062687	0.063844	0.999017	1399	1	-8.0104
Olfr596	6	0.97212	0.97482	0.999991	21835	1	-6.4373	0.062734	0.063894	0.999017	1400	1	-6.4373
Grb14	6	0.58799	0.79525	0.999991	17200	3	-5.7135	0.06278	0.063933	0.999017	1401	1	-5.7135
Olfr504	5	0.61572	0.78372	0.999991	17633	2	-7.2307	0.062874	0.063199	0.999017	1402	1	-7.2307
Ctsf	6	0.069988	0.21241	0.999991	4529	3	-5.6241	0.062874	0.064019	0.999017	1403	1	-5.6241
Gm1647	6	0.21908	0.46071	0.999991	9815	3	-7.6357	0.062921	0.064066	0.999017	1404	1	-7.6357
Tas2r105	6	0.16479	0.3849	0.999991	8189	4	-6.5339	0.062968	0.064103	0.999017	1405	1	-6.5339
NonTargetingControlGuideForMouse_0894	2	0.80693	0.80661	0.999991	19954	0	-2.1251	0.063081	0.063001	0.999017	1406	0	-2.1251
Olfr834	6	0.072037	0.21734	0.999991	4643	1	-5.7514	0.063109	0.06423	0.999017	1407	1	-5.7514
mmu-mir-3963	4	0.85574	0.87915	0.999991	20460	1	-3.4274	0.063111	0.062994	0.999017	1408	1	-3.4274
Sdccag8	6	0.97457	0.97638	0.999991	21883	1	-6.4638	0.063156	0.064279	0.999017	1409	1	-6.4638
Mkln1	5	0.048081	0.14841	0.999991	3363	2	-5.0525	0.063266	0.063581	0.999017	1410	1	-5.0525
Zfp780b	4	0.45334	0.63524	0.999991	15058	2	-4.8298	0.063268	0.063148	0.999017	1411	1	-4.8298
Kbtbd8	6	0.14114	0.35025	0.999991	7466	4	-7.8369	0.063297	0.064427	0.999017	1412	1	-7.8369
Ptprs	6	0.12166	0.3207	0.999991	6802	4	-8.1154	0.063344	0.064467	0.999017	1413	1	-8.1154
Phldb1	6	0.23104	0.47667	0.999991	10157	3	-5.9773	0.063391	0.064512	0.999017	1414	1	-5.9773
Herpud2	6	0.21006	0.4485	0.999991	9551	4	-7.8264	0.063438	0.064556	0.999017	1415	1	-7.8264
Vmn1r4	6	0.074595	0.22343	0.999991	4767	3	-6.895	0.063484	0.064599	0.999017	1416	1	-6.895
Shb	5	0.63605	0.79486	0.999991	17912	2	-7.0619	0.063501	0.063803	0.999017	1417	1	-7.0619
NonTargetingControlGuideForMouse_0484	2	0.197	0.31247	0.999991	9168	1	-4.7039	0.063529	0.063445	0.999017	1418	0	-4.7039
Cdc42bpb	6	0.50107	0.73242	0.999991	15904	3	-7.1973	0.063531	0.06464	0.999017	1419	1	-7.1973
Pld3	5	0.47269	0.69833	0.999991	15419	2	-7.2097	0.06354	0.063843	0.999017	1420	1	-7.2097
Olfr275	6	0.077807	0.23093	0.999991	4909	3	-5.3989	0.063578	0.064685	0.999017	1421	1	-5.3989
Pqbp1	5	0.39121	0.62139	0.999991	13950	3	-7.5634	0.063619	0.063914	0.999017	1422	1	-7.5634
Slc4a1	6	0.80039	0.90216	0.999991	19869	2	-2.5919	0.063625	0.064731	0.999017	1423	1	-2.5919
Ung	6	0.58607	0.79384	0.999991	17169	2	-7.0467	0.063672	0.064774	0.999017	1424	1	-7.0467
Hbq1b	4	0.44351	0.62803	0.999991	14874	2	-6.6162	0.063677	0.063544	0.999017	1425	1	-6.6162
Ankrd50	5	0.20651	0.4318	0.999991	9444	2	-3.2056	0.063736	0.064034	0.999017	1426	1	-3.2056
Sema6d	6	0.037263	0.12936	0.998679	2760	5	-8.2104	0.063766	0.064868	0.999017	1427	1	-8.2104
Olfr648	6	0.1263	0.32779	0.999991	6963	3	-7.601	0.063813	0.064918	0.999017	1428	1	-7.601
Esrrb	5	0.67047	0.81417	0.999991	18381	1	-2.8596	0.063814	0.064111	0.999017	1429	1	-2.8596
Cacna1c	6	0.082346	0.24143	0.999991	5124	3	-6.0102	0.06386	0.064965	0.999017	1430	1	-6.0102
NonTargetingControlGuideForMouse_0144	2	0.28609	0.40515	0.999991	11680	1	-4.504	0.063944	0.063861	0.999017	1431	0	-4.504
Vmn2r54	6	0.26037	0.51486	0.999991	10986	2	-6.4587	0.064	0.065093	0.999017	1432	1	-6.4587
Cd300lg	5	0.074693	0.20514	0.999991	4775	2	-6.5474	0.06401	0.064301	0.999017	1433	1	-6.5474
Ubiad1	4	0.55771	0.71284	0.999991	16744	1	-2.5945	0.064023	0.063871	0.999017	1434	1	-2.5945
Morc3	6	0.012688	0.055673	0.979113	1173	5	-8.005	0.064047	0.065142	0.999017	1435	1	-8.005
Zfp873	5	0.20935	0.4349	0.999991	9530	3	-7.2346	0.064049	0.064334	0.999017	1436	1	-7.2346
Iqcj	4	0.5697	0.72188	0.999991	16935	2	-4.5126	0.064086	0.063941	0.999017	1437	1	-4.5126
Pop5	5	0.8649	0.91574	0.999991	20580	1	-5.2348	0.064128	0.064414	0.999017	1438	1	-5.2348
Cd28	6	0.68052	0.85239	0.999991	18476	2	-4.4102	0.064188	0.065276	0.999017	1439	1	-4.4102
Ythdf1	6	0.52371	0.74886	0.999991	16245	1	-6.1046	0.064235	0.065314	0.999017	1440	1	-6.1046
Chmp2a	4	0.63818	0.77479	0.999991	17948	2	-7.2464	0.064243	0.064101	0.999017	1441	1	-7.2464
Ngp	5	0.89798	0.92714	0.999991	20982	1	-4.6234	0.064245	0.064534	0.999017	1442	1	-4.6234
Slc38a9	6	0.28798	0.54976	0.999991	11741	3	-4.6231	0.064282	0.065363	0.999017	1443	1	-4.6231
Olfr1036	5	0.10483	0.26512	0.999991	6156	3	-8.214	0.064284	0.064571	0.999017	1444	1	-8.214
Dis3l	6	0.054439	0.1741	0.999991	3695	4	-8.3755	0.064329	0.065403	0.999017	1445	1	-8.3755
Olfr110	6	0.036282	0.1267	0.998679	2709	4	-8.062	0.064469	0.065534	0.999017	1446	1	-8.062
Myh7b	6	0.64458	0.83522	0.999991	18048	2	-5.9137	0.064516	0.065589	0.999017	1447	1	-5.9137
Arhgap39	5	0.46364	0.68999	0.999991	15220	2	-7.1117	0.064598	0.064872	0.999017	1448	1	-7.1117
8430419L09Rik	6	0.008886	0.040345	0.962693	880	4	-8.5965	0.064657	0.065727	0.999017	1449	1	-8.5965
Kbtbd4	5	0.53321	0.74031	0.999991	16392	2	-7.1103	0.064676	0.064945	0.999017	1450	1	-7.1103
Olfr1201	6	0.58058	0.78985	0.999991	17083	3	-7.0696	0.064704	0.065761	0.999017	1451	1	-7.0696
8030411F24Rik	6	0.50335	0.73413	0.999991	15937	3	-6.9788	0.06475	0.065805	0.999017	1452	1	-6.9788
Sec62	6	0.41925	0.67269	0.999991	14450	2	-6.6012	0.064797	0.065846	0.999017	1453	1	-6.6012
Tmem119	4	0.92197	0.92307	0.999991	21173	1	-4.7455	0.064809	0.064672	0.999017	1454	1	-4.7455
Cgn	6	0.023421	0.090329	0.995842	1919	4	-8.4168	0.064891	0.065931	0.999017	1455	1	-8.4168
Prss1	4	0.49824	0.66827	0.999991	15864	1	-4.3742	0.064934	0.0648	0.999017	1456	1	-4.3742
Tmem19	6	0.96807	0.97251	0.999991	21762	1	-4.3365	0.064938	0.065982	0.999017	1457	1	-4.3365
Olfr686	6	0.67691	0.85101	0.999991	18440	2	-5.8059	0.064985	0.066024	0.999017	1458	1	-5.8059
Vbp1	6	0.87277	0.93842	0.999991	20697	1	-3.6944	0.065032	0.066058	0.999017	1459	1	-3.6944
Mkl2	5	0.49288	0.71695	0.999991	15774	3	-7.3487	0.065067	0.065327	0.999017	1460	1	-7.3487
Smgc	6	0.13699	0.34406	0.999991	7303	4	-5.9981	0.065125	0.066146	0.999017	1461	1	-5.9981
Myo15	6	0.81029	0.90684	0.999991	20000	2	-6.8019	0.065172	0.066188	0.999017	1462	1	-6.8019
Vmn1r180	6	0.45131	0.69624	0.999991	15024	3	-7.5007	0.065219	0.066237	0.999017	1463	1	-7.5007
Prss55	5	0.31817	0.5489	0.999991	12487	2	-7.2906	0.065224	0.065476	0.999017	1464	1	-7.2906
Pex7	5	0.32834	0.55915	0.999991	12733	3	-7.6972	0.065341	0.065578	0.999017	1465	1	-7.6972
Sectm1a	6	0.090253	0.25953	0.999991	5508	2	-6.4757	0.065359	0.066373	0.999017	1466	1	-6.4757
Rap1b	6	0.099602	0.28058	0.999991	5929	4	-8.0858	0.065406	0.066412	0.999017	1467	1	-8.0858
Nlgn2	6	0.05411	0.17328	0.999991	3682	3	-7.382	0.0655	0.066497	0.999017	1468	1	-7.382
Adhfe1	5	0.086938	0.23011	0.999991	5364	3	-8.3254	0.065537	0.065776	0.999017	1469	1	-8.3254
Rfxap	6	0.061383	0.19157	0.999991	4062	4	-8.2741	0.065594	0.066589	0.999017	1470	1	-8.2741
Islr2	6	0.079853	0.23559	0.999991	5004	4	-7.7846	0.065687	0.066681	0.999017	1471	1	-7.7846
Pou4f3	5	0.58778	0.76865	0.999991	17196	1	-2.8719	0.065732	0.065958	0.999017	1472	1	-2.8719
Ctc1	6	0.69647	0.85843	0.999991	18649	1	-6.3028	0.065734	0.066724	0.999017	1473	1	-6.3028
Csdc2	6	0.04144	0.14048	0.998679	3020	5	-7.8351	0.065781	0.06677	0.999017	1474	1	-7.8351
Ntrk1	4	0.69525	0.81583	0.999991	18642	1	-4.4979	0.065813	0.065701	0.999017	1475	1	-4.4979
Prkd3	6	0.35101	0.62208	0.999991	13247	3	-7.0691	0.065828	0.066812	0.999017	1476	1	-7.0691
Stfa3	4	0.16652	0.33743	0.999991	8251	2	-5.5052	0.065876	0.065754	0.999017	1477	1	-5.5052
Decr1	6	0.72233	0.86867	0.999991	18948	2	-4.6649	0.065921	0.0669	0.999017	1478	1	-4.6649
Higd1c	5	0.038316	0.12654	0.998679	2816	2	-1.8705	0.065928	0.066145	0.999017	1479	1	-1.8705
Chst1	6	0.042892	0.14435	0.999991	3098	5	-7.7878	0.065968	0.06695	0.999017	1480	1	-7.7878
AI848285	5	0.46533	0.69158	0.999991	15255	2	-4.4766	0.066045	0.066265	0.999017	1481	1	-4.4766
Amhr2	6	0.56212	0.77656	0.999991	16813	2	-5.9454	0.066109	0.067082	0.999017	1482	1	-5.9454
mmu-mir-680-2	2	0.99067	0.99056	0.999991	22274	0	-1.8961	0.06618	0.066073	0.999017	1483	0	-1.8961
Casp4	6	0.98711	0.98706	0.999991	22180	0	-7.0552	0.066202	0.067177	0.999017	1484	1	-7.0552
Tmem231	6	0.11489	0.31026	0.999991	6556	4	-8.1328	0.066296	0.067269	0.999017	1485	1	-8.1328
Map3k19	6	0.018909	0.076962	0.986484	1654	5	-7.8386	0.066389	0.067355	0.999017	1486	1	-7.8386
Lepr	6	0.23679	0.48414	0.999991	10330	4	-7.6961	0.066436	0.067403	0.999017	1487	1	-7.6961
Xpo6	6	0.13182	0.33624	0.999991	7114	4	-7.968	0.066483	0.06745	0.999017	1488	1	-7.968
Myl2	6	0.054521	0.17431	0.999991	3698	4	-7.9386	0.06653	0.067497	0.999017	1489	1	-7.9386
Srpk3	6	0.21752	0.45862	0.999991	9770	3	-7.2214	0.066576	0.067541	0.999017	1490	1	-7.2214
Gucy1a2	6	0.46738	0.70789	0.999991	15293	3	-6.6954	0.066623	0.067585	0.999017	1491	1	-6.6954
Kazald1	5	0.47616	0.70154	0.999991	15487	3	-7.3841	0.066631	0.066844	0.999017	1492	1	-7.3841
Cpox	6	0.099602	0.28058	0.999991	5930	4	-7.9862	0.06667	0.067625	0.999017	1493	1	-7.9862
Gtf3c1	6	0.57351	0.78476	0.999991	16986	2	-5.2293	0.066717	0.067666	0.999017	1494	1	-5.2293
Lin52	6	0.098089	0.27721	0.999991	5860	4	-7.2041	0.066764	0.067712	0.999017	1495	1	-7.2041
mmu-mir-3471-1	3	0.95118	0.95141	0.999991	21501	0	-5.6488	0.066772	0.066748	0.999017	1496	0	-5.6488
Fam199x	6	0.17927	0.40563	0.999991	8657	4	-7.8132	0.06681	0.067756	0.999017	1497	1	-7.8132
mmu-mir-136	2	0.97095	0.97096	0.999991	21808	0	-2.7185	0.06693	0.066837	0.999017	1498	0	-2.7185
Ldoc1	6	0.53329	0.75581	0.999991	16397	2	-6.4796	0.066951	0.067888	0.999017	1499	1	-6.4796
Plrg1	5	0.22407	0.45069	0.999991	9950	3	-7.9283	0.067022	0.067246	0.999017	1500	1	-7.9283
Glt8d1	6	0.97242	0.975	0.999991	21846	1	-6.2977	0.067044	0.067984	0.999017	1501	1	-6.2977
Thada	6	0.95592	0.96673	0.999991	21569	1	-5.7483	0.067091	0.068032	0.999017	1502	1	-5.7483
Serpinb6a	5	0.87145	0.91781	0.999991	20671	1	-4.5619	0.0671	0.067316	0.999017	1503	1	-4.5619
Mtrf1	6	0.10621	0.29493	0.999991	6209	4	-8.0892	0.067138	0.068074	0.999017	1504	1	-8.0892
Tfap4	5	0.060886	0.17623	0.999991	4029	2	-6.4422	0.067178	0.067405	0.999017	1505	1	-6.4422
Trip13	6	0.54644	0.76527	0.999991	16582	2	-5.3614	0.067231	0.068161	0.999017	1506	1	-5.3614
Acp2	6	0.23468	0.48142	0.999991	10274	3	-5.4422	0.067278	0.068212	0.999017	1507	1	-5.4422
Avpr1a	6	0.16584	0.38641	0.999991	8223	3	-7.2264	0.067325	0.068258	0.999017	1508	1	-7.2264
Tob2	6	0.17095	0.3938	0.999991	8406	2	-7.2008	0.067372	0.06831	0.999017	1509	1	-7.2008
NonTargetingControlGuideForMouse_0342	2	0.27863	0.40072	0.999991	11491	1	-1.882	0.067505	0.067411	0.999017	1510	0	-1.882
Gm996	6	0.65381	0.84164	0.999991	18189	2	-5.4083	0.067512	0.068443	0.999017	1511	1	-5.4083
Vmn1r112	2	0.20933	0.32946	0.999991	9529	1	-4.5232	0.067552	0.06746	0.999017	1512	0	-4.5232
Ufc1	6	0.35184	0.62265	0.999991	13267	2	-6.8627	0.067559	0.068492	0.999017	1513	1	-6.8627
Hyal3	6	0.34618	0.61849	0.999991	13151	3	-6.3185	0.067605	0.068531	0.999017	1514	1	-6.3185
Clec9a	4	0.03132	0.095753	0.995842	2444	2	-4.9296	0.067633	0.067515	0.999017	1515	1	-4.9296
Olfr747	5	0.26785	0.49701	0.999991	11195	2	-6.7293	0.067647	0.067853	0.999017	1516	1	-6.7293
Lrrtm3	5	0.6996	0.83095	0.999991	18683	2	-6.8731	0.067686	0.067892	0.999017	1517	1	-6.8731
Plaur	6	0.52723	0.75149	0.999991	16304	3	-4.7544	0.067699	0.068615	0.999017	1518	1	-4.7544
Gm13124	6	0.75442	0.88189	0.999991	19308	2	-6.8454	0.067745	0.068663	0.999017	1519	1	-6.8454
Thsd7b	6	0.021678	0.085187	0.995842	1812	3	-5.725	0.067792	0.068711	0.999017	1520	1	-5.725
Ropn1	6	0.21434	0.4544	0.999991	9671	4	-7.737	0.067839	0.068756	0.999017	1521	1	-7.737
2410124H12Rik	6	0.083565	0.24427	0.999991	5191	5	-7.6863	0.067932	0.068836	0.999017	1522	1	-7.6863
Spns2	5	0.16433	0.3725	0.999991	8174	4	-7.4092	0.067959	0.068171	0.999017	1523	1	-7.4092
Vmn1r222	6	0.050958	0.16525	0.999991	3501	3	-6.3405	0.067979	0.068881	0.999017	1524	1	-6.3405
Mid2	6	0.23115	0.47682	0.999991	10165	3	-5.7745	0.068073	0.068984	0.999017	1525	1	-5.7745
Ms4a18	6	0.10461	0.29147	0.999991	6145	4	-8.189	0.068119	0.06903	0.999017	1526	1	-8.189
Ppm1m	6	0.16802	0.38956	0.999991	8306	3	-6.4451	0.068213	0.069112	0.999017	1527	1	-6.4451
Cxadr	6	0.031316	0.11286	0.995842	2442	4	-5.8212	0.068259	0.069166	0.999017	1528	1	-5.8212
Rps24	5	0.87402	0.91862	0.999991	20714	1	-6.6435	0.068271	0.06848	0.999017	1529	1	-6.6435
Vps13b	6	0.24692	0.49742	0.999991	10618	1	-1.8483	0.068353	0.069254	0.999017	1530	1	-1.8483
mmu-mir-568	4	0.21638	0.4081	0.999991	9745	3	-5.6742	0.068353	0.068223	0.999017	1531	1	-5.6742
Cwh43	6	0.97935	0.97983	0.999991	21971	1	-4.6997	0.0684	0.069293	0.999017	1532	1	-4.6997
Tas2r107	5	0.0053358	0.02207	0.914136	578	2	-3.1729	0.068427	0.068637	0.999017	1533	1	-3.1729
Rnf181	5	0.50002	0.72344	0.999991	15889	2	-6.0581	0.068505	0.068716	0.999017	1534	1	-6.0581
mmu-mir-7043	4	0.21201	0.40205	0.999991	9607	3	-7.8862	0.068572	0.068436	0.999017	1535	1	-7.8862
Spint4	6	0.33078	0.60146	0.999991	12795	2	-4.8152	0.068586	0.069482	0.999017	1536	1	-4.8152
mmu-mir-1899	2	0.11832	0.1983	0.999991	6678	1	-4.8472	0.068589	0.068516	0.999017	1537	0	-4.8472
Olfr668	5	0.2698	0.49903	0.999991	11257	2	-5.9342	0.068622	0.068843	0.999017	1538	1	-5.9342
Psg21	6	0.16972	0.39203	0.999991	8368	4	-7.6057	0.068633	0.06953	0.999017	1539	1	-7.6057
Rassf3	5	0.48039	0.70549	0.999991	15566	2	-4.7272	0.068661	0.068883	0.999017	1540	1	-4.7272
Prr24	6	0.41902	0.67253	0.999991	14442	3	-7.2499	0.06868	0.069574	0.999017	1541	1	-7.2499
Esam	6	0.22223	0.46498	0.999991	9898	3	-4.6502	0.068727	0.069618	0.999017	1542	1	-4.6502
Itgb5	6	0.9843	0.98423	0.999991	22100	1	-4.2032	0.068773	0.069659	0.999017	1543	1	-4.2032
Gm6484	5	0.015344	0.058504	0.979113	1391	3	-7.7184	0.068817	0.06903	0.999017	1544	1	-7.7184
Plxnb1	5	0.24541	0.47336	0.999991	10582	3	-7.0856	0.068895	0.069111	0.999017	1545	1	-7.0856
NonTargetingControlGuideForMouse_0928	2	0.99858	0.99858	0.999991	22473	0	-0.67865	0.068939	0.068882	0.999017	1546	0	-0.67865
Il2rb	6	0.11453	0.30969	0.999991	6537	4	-6.331	0.06896	0.069847	0.999017	1547	1	-6.331
Dopey1	6	0.47957	0.71682	0.999991	15552	3	-6.9434	0.069007	0.069895	0.999017	1548	1	-6.9434
Olfr631	5	0.047783	0.14776	0.999991	3347	2	-7.1433	0.069012	0.069224	0.999017	1549	1	-7.1433
Gyg	6	0.9577	0.96749	0.999991	21586	1	-3.3161	0.069053	0.069944	0.999017	1550	1	-3.3161
Slc35a5	6	0.64398	0.83478	0.999991	18038	2	-5.5026	0.069147	0.070029	0.999017	1551	1	-5.5026
Ucn2	5	0.013695	0.052712	0.979113	1257	3	-7.3289	0.069168	0.069364	0.999017	1552	1	-7.3289
Cox8c	6	0.84689	0.92482	0.999991	20367	2	-6.8018	0.069193	0.070077	0.999017	1553	1	-6.8018
Zfp78	6	0.26762	0.52409	0.999991	11190	4	-5.7509	0.06924	0.070122	0.999017	1554	1	-5.7509
Lyrm7	6	0.17174	0.39489	0.999991	8434	3	-3.5597	0.069287	0.070168	0.999017	1555	1	-3.5597
Duox2	6	0.38823	0.64966	0.999991	13895	3	-6.7467	0.069427	0.070291	0.999017	1556	1	-6.7467
Krba1	5	0.055974	0.16571	0.999991	3782	3	-5.7942	0.069441	0.069624	0.999017	1557	1	-5.7942
Vmn1r87	6	0.048965	0.16015	0.999991	3402	3	-6.8738	0.069473	0.070336	0.999017	1558	1	-6.8738
2410127L17Rik	5	0.25882	0.48747	0.999991	10947	2	-1.9775	0.06948	0.06966	0.999017	1559	1	-1.9775
NonTargetingControlGuideForMouse_0946	2	0.9617	0.96183	0.999991	21640	0	-2.9707	0.069497	0.069439	0.999017	1560	0	-2.9707
Psg19	6	0.51398	0.74185	0.999991	16100	3	-7.1376	0.06952	0.070385	0.999017	1561	1	-7.1376
Lrrc48	6	0.66283	0.84574	0.999991	18302	2	-6.2171	0.069613	0.070472	0.999017	1562	1	-6.2171
N6amt1	6	0.2282	0.47288	0.999991	10069	2	-3.5691	0.06966	0.070517	0.999017	1563	1	-3.5691
Zfp472	5	0.98545	0.98549	0.999991	22129	0	-1.7694	0.069675	0.069854	0.999017	1564	1	-1.7694
NonTargetingControlGuideForMouse_0608	2	0.71566	0.71652	0.999991	18863	1	-3.065	0.069704	0.069653	0.999017	1565	0	-3.065
Ttll9	6	0.38523	0.64741	0.999991	13840	3	-4.9843	0.069707	0.07056	0.999017	1566	1	-4.9843
Hoxa13	6	0.046969	0.15501	0.999991	3303	5	-8.3575	0.069753	0.070604	0.999017	1567	1	-8.3575
mmu-mir-7217	4	0.2123	0.40245	0.999991	9617	3	-7.9076	0.069793	0.069666	0.999017	1568	1	-7.9076
Eef1a2	6	0.91588	0.95405	0.999991	21114	1	-5.7744	0.0698	0.070645	0.999017	1569	1	-5.7744
Rhbdd2	6	0.86932	0.93657	0.999991	20644	2	-5.9802	0.069893	0.070734	0.999017	1570	1	-5.9802
Sfxn5	6	0.018413	0.075467	0.986484	1619	3	-5.879	0.069987	0.070826	0.999017	1571	1	-5.879
Neto1	6	0.20661	0.44371	0.999991	9446	2	-5.6929	0.070033	0.070882	0.999017	1572	1	-5.6929
Mup5	5	0.39309	0.62326	0.999991	13995	3	-7.5603	0.070065	0.070237	0.999017	1573	1	-7.5603
Gal3st2	6	0.013187	0.057657	0.979113	1216	4	-5.1278	0.070126	0.070974	0.999017	1574	1	-5.1278
Nkx2-5	6	0.30604	0.5719	0.999991	12188	3	-7.5269	0.070173	0.071017	0.999017	1575	1	-7.5269
Cldn6	5	0.19933	0.42401	0.999991	9244	2	-6.6082	0.070182	0.070352	0.999017	1576	1	-6.6082
Hoxd4	5	0.94665	0.95125	0.999991	21450	1	-5.2624	0.070298	0.070465	0.999017	1577	1	-5.2624
Cyb5	6	0.047882	0.15737	0.999991	3349	4	-8.2209	0.070313	0.071157	0.999017	1578	1	-8.2209
Med10	6	0.29965	0.56414	0.999991	12030	3	-7.5889	0.070406	0.071253	0.999017	1579	1	-7.5889
Pnpla7	5	0.079165	0.21431	0.999991	4977	2	-7.1166	0.070493	0.070652	0.999017	1580	1	-7.1166
Syndig1l	6	0.93968	0.96068	0.999991	21365	1	-3.5764	0.070593	0.071427	0.999017	1581	1	-3.5764
Ttc9b	6	0.86952	0.93667	0.999991	20646	1	-3.779	0.070639	0.071473	0.999017	1582	1	-3.779
Tmem196	4	0.89325	0.90146	0.999991	20946	1	-4.796	0.0707	0.070586	0.999017	1583	1	-4.796
Hdhd2	6	0.068428	0.20867	0.999991	4451	5	-4.2173	0.070733	0.071577	0.999017	1584	1	-4.2173
Dpyd	6	0.41792	0.67169	0.999991	14422	3	-6.0776	0.070779	0.07163	0.999017	1585	1	-6.0776
Hs6st3	4	0.68178	0.809	0.999991	18490	2	-6.0711	0.070794	0.070677	0.999017	1586	1	-6.0711
Cypt2	5	0.42728	0.65599	0.999991	14598	1	-6.0695	0.070844	0.070988	0.999017	1587	1	-6.0695
2310002J15Rik	6	0.067021	0.20527	0.999991	4382	4	-5.0823	0.070872	0.071716	0.999017	1588	1	-5.0823
Cyb561d2	6	0.16401	0.38382	0.999991	8164	4	-7.8825	0.070919	0.071759	0.999017	1589	1	-7.8825
3110021N24Rik	6	0.15911	0.37669	0.999991	8019	2	-3.4697	0.070966	0.071812	0.999017	1590	1	-3.4697
Fam120c	5	0.10708	0.26941	0.999991	6248	4	-7.4192	0.070999	0.071147	0.999017	1591	1	-7.4192
Cdk9	6	0.24521	0.49522	0.999991	10575	1	-3.8096	0.071059	0.071909	0.999017	1592	1	-3.8096
Grhl3	6	0.47469	0.71325	0.999991	15457	3	-6.6361	0.071152	0.072002	0.999017	1593	1	-6.6361
Dnajc4	4	0.22281	0.41689	0.999991	9913	1	-4.7518	0.071169	0.071055	0.999017	1594	1	-4.7518
Sox8	5	0.52494	0.73606	0.999991	16267	2	-7.2791	0.071233	0.07137	0.999017	1595	1	-7.2791
Micall2	6	0.78003	0.89303	0.999991	19605	1	-6.1294	0.071245	0.072094	0.999017	1596	1	-6.1294
Treh	6	0.044848	0.14945	0.999991	3194	3	-4.6425	0.071292	0.072135	0.999017	1597	1	-4.6425
mmu-mir-743a	4	0.99934	0.99935	0.999991	22488	0	-3.2968	0.071357	0.071233	0.999017	1598	1	-3.2968
Sytl2	6	0.17137	0.3944	0.999991	8422	3	-6.3008	0.071385	0.072219	0.999017	1599	1	-6.3008
Vdr	6	0.53321	0.75576	0.999991	16391	3	-6.2446	0.071432	0.072264	0.999017	1600	1	-6.2446
Usp35	6	0.26302	0.51825	0.999991	11065	2	-6.2201	0.071571	0.072399	0.999017	1601	1	-6.2201
Slc6a19	6	0.56164	0.77621	0.999991	16805	3	-6.8861	0.071618	0.07245	0.999017	1602	1	-6.8861
NonTargetingControlGuideForMouse_0516	2	0.9212	0.92129	0.999991	21166	0	-2.2333	0.071647	0.071597	0.999017	1603	0	-2.2333
Mon2	5	0.20409	0.42919	0.999991	9383	3	-3.4537	0.071661	0.071791	0.999017	1604	1	-3.4537
Pkdrej	6	0.24105	0.48977	0.999991	10446	3	-4.9152	0.071664	0.072499	0.999017	1605	1	-4.9152
Ccin	6	0.94727	0.96331	0.999991	21460	1	-4.9698	0.071711	0.07254	0.999017	1606	1	-4.9698
Asic1	4	0.98941	0.98937	0.999991	22233	0	-3.2667	0.071763	0.071632	0.999017	1607	1	-3.2667
Gal3st1	5	0.36658	0.5972	0.999991	13507	3	-7.614	0.071817	0.071958	0.999017	1608	1	-7.614
Asb10	6	0.63152	0.82602	0.999991	17845	2	-5.1153	0.071851	0.072671	0.999017	1609	1	-5.1153
3830403N18Rik	6	0.10173	0.28519	0.999991	6030	4	-5.9349	0.071944	0.072766	0.999017	1610	1	-5.9349
Casp2	6	0.079392	0.23453	0.999991	4986	3	-6.8165	0.07199	0.072807	0.999017	1611	1	-6.8165
Vmn1r60	6	0.34277	0.61551	0.999991	13085	3	-4.8497	0.072084	0.072904	0.999017	1612	1	-4.8497
Psmb5	6	0.99914	0.99913	0.999991	22486	0	-5.5419	0.07213	0.072943	0.999017	1613	1	-5.5419
Rnf115	6	0.52321	0.7485	0.999991	16239	3	-4.4411	0.072177	0.072991	0.999017	1614	1	-4.4411
4930427A07Rik	6	0.23403	0.48058	0.999991	10256	2	-6.3298	0.072223	0.073032	0.999017	1615	1	-6.3298
Nmnat3	4	0.41025	0.60379	0.999991	14283	1	-4.7078	0.072231	0.072102	0.999017	1616	1	-4.7078
Mut	6	0.07647	0.22785	0.999991	4846	4	-8.1271	0.07227	0.073077	0.999017	1617	1	-8.1271
NonTargetingControlGuideForMouse_0579	2	0.3724	0.45784	0.999991	13625	1	-4.5085	0.072283	0.072218	0.999017	1618	0	-4.5085
Shroom3	5	0.19674	0.42121	0.999991	9162	1	-2.473	0.0724	0.072535	0.999017	1619	1	-2.473
Vmn2r42	1	0.92748	0.92771	0.999991	21236	0	-1.2369	0.07252	0.0725	0.999017	1620	0	-1.2369
Prpf4b	6	0.94615	0.96287	0.999991	21444	1	-5.261	0.072549	0.073343	0.999017	1621	1	-5.261
NonTargetingControlGuideForMouse_0785	2	0.58745	0.60784	0.999991	17188	1	-4.3264	0.072601	0.072526	0.999017	1622	0	-4.3264
Alpk1	6	0.38077	0.64409	0.999991	13771	3	-5.3937	0.072642	0.073425	0.999017	1623	1	-5.3937
Gm8300	2	0.12159	0.20321	0.999991	6801	1	-4.6795	0.072649	0.072571	0.999017	1624	0	-4.6795
Apoh	5	0.36214	0.59286	0.999991	13432	2	-4.1081	0.072711	0.07286	0.999017	1625	1	-4.1081
Tex38	6	0.80466	0.90414	0.999991	19924	2	-6.7355	0.072782	0.073558	0.999017	1626	1	-6.7355
C4a	6	0.21451	0.45464	0.999991	9675	4	-6.4611	0.072828	0.073606	0.999017	1627	1	-6.4611
Actg1	6	0.86863	0.93619	0.999991	20637	2	-7.0487	0.072875	0.073647	0.999017	1628	1	-7.0487
Pfkp	6	0.20596	0.44283	0.999991	9433	4	-7.7274	0.072968	0.073738	0.999017	1629	1	-7.7274
Gml	5	0.016041	0.06093	0.979113	1445	2	-6.5724	0.072983	0.073112	0.999017	1630	1	-6.5724
Aoc3	6	0.087387	0.25301	0.999991	5379	2	-6.742	0.073014	0.073783	0.999017	1631	1	-6.742
NonTargetingControlGuideForMouse_0421	2	0.028695	0.052674	0.979113	2262	1	-5.0927	0.073015	0.07293	0.999017	1632	0	-5.0927
St3gal4	5	0.070999	0.19743	0.999991	4587	2	-5.3822	0.073022	0.073155	0.999017	1633	1	-5.3822
Nptn	6	0.12299	0.32274	0.999991	6856	2	-5.2858	0.073154	0.073928	0.999017	1634	1	-5.2858
mmu-mir-1963	4	0.48377	0.65759	0.999991	15628	1	-6.483	0.073199	0.073076	0.999017	1635	1	-6.483
Tmem134	6	0.19715	0.43072	0.999991	9171	4	-7.9354	0.0732	0.073974	0.999017	1636	1	-7.9354
Gm13051	5	0.0043959	0.018367	0.876395	484	3	-9.0315	0.073255	0.073394	0.999017	1637	1	-9.0315
Spata16	4	0.00079139	0.0029366	0.651208	120	3	-9.235	0.073293	0.073166	0.999017	1638	1	-9.235
Syt16	5	0.27839	0.50798	0.999991	11484	2	-5.699	0.073294	0.073432	0.999017	1639	1	-5.699
Scrn3	5	0.2312	0.45829	0.999991	10169	1	-6.5405	0.073333	0.073473	0.999017	1640	1	-6.5405
Asap1	6	0.56632	0.77957	0.999991	16879	3	-7.3557	0.07334	0.0741	0.999017	1641	1	-7.3557
Ncf4	5	0.79034	0.88685	0.999991	19749	1	-1.6767	0.073372	0.073519	0.999017	1642	1	-1.6767
F7	6	0.51792	0.7447	0.999991	16166	3	-7.1389	0.073386	0.074136	0.999017	1643	1	-7.1389
0610010B08Rik	6	0.035451	0.12442	0.998679	2670	3	-1.7393	0.073433	0.074178	0.999017	1644	1	-1.7393
Upk3a	6	0.11915	0.31688	0.999991	6701	4	-7.4741	0.073479	0.074219	0.999017	1645	1	-7.4741
mmu-mir-7668	4	0.96997	0.96992	0.999991	21795	0	-3.9736	0.07348	0.073339	0.999017	1646	1	-3.9736
NonTargetingControlGuideForMouse_0482	2	0.095395	0.163	0.999991	5734	1	-5.0515	0.073508	0.073422	0.999017	1647	0	-5.0515
Isyna1	5	0.90101	0.92831	0.999991	21008	1	-4.53	0.073527	0.073679	0.999017	1648	1	-4.53
Zfp641	6	0.051607	0.16692	0.999991	3533	4	-7.0206	0.073572	0.074312	0.999017	1649	1	-7.0206
Meox2	5	0.036393	0.12219	0.998679	2716	2	-5.9098	0.073605	0.073755	0.999017	1650	1	-5.9098
Olfr352	6	0.44534	0.69184	0.999991	14908	3	-5.9253	0.073665	0.07439	0.999017	1651	1	-5.9253
Bloc1s4	4	0.088429	0.21813	0.999991	5431	3	-8.0437	0.073698	0.073555	0.999017	1652	1	-8.0437
mmu-mir-22	4	0.069604	0.18735	0.999991	4507	3	-8.1631	0.073729	0.073583	0.999017	1653	0	-8.1631
Ccdc152	6	0.30864	0.57508	0.999991	12257	3	-7.5715	0.073758	0.074486	0.999017	1654	1	-7.5715
Zfp747	6	0.99668	0.99664	0.999991	22428	0	-6.5043	0.073805	0.074528	0.999017	1655	1	-6.5043
mmu-mir-1904	4	0.04052	0.12038	0.995937	2961	3	-8.1903	0.073917	0.073775	0.999017	1656	0	-8.1903
Tmprss11bnl	6	0.96986	0.97349	0.999991	21794	1	-2.8101	0.073991	0.074717	0.999017	1657	1	-2.8101
Rb1cc1	5	0.79308	0.88868	0.999991	19775	2	-6.7879	0.074032	0.074172	0.999017	1658	1	-6.7879
Zfp661	6	0.91861	0.95474	0.999991	21141	1	-5.5612	0.074037	0.074766	0.999017	1659	1	-5.5612
NonTargetingControlGuideForMouse_0618	2	0.93853	0.93868	0.999991	21349	0	-2.1451	0.074048	0.073954	0.999017	1660	0	-2.1451
Mcpt9	6	0.13411	0.33969	0.999991	7201	2	-6.581	0.074084	0.07481	0.999017	1661	1	-6.581
Acadm	6	0.49113	0.7252	0.999991	15749	1	-6.0174	0.07413	0.07485	0.999017	1662	1	-6.0174
Zmynd11	5	0.27905	0.50868	0.999991	11504	3	-7.3551	0.074187	0.074326	0.999017	1663	1	-7.3551
Cox11	6	0.088166	0.25481	0.999991	5419	4	-7.5546	0.074269	0.074996	0.999017	1664	1	-7.5546
Ndufa8	6	0.58391	0.79228	0.999991	17126	1	-4.7579	0.074316	0.075045	0.999017	1665	1	-4.7579
mmu-mir-7015	4	0.65608	0.78875	0.999991	18218	1	-6.979	0.074353	0.074191	0.999017	1666	0	-6.979
Csk	6	0.32794	0.59813	0.999991	12718	3	-6.4944	0.074362	0.075095	0.999017	1667	1	-6.4944
mmu-mir-128-2	4	0.99638	0.9964	0.999991	22422	0	-3.8605	0.074447	0.074283	0.999017	1668	0	-3.8605
Gm16442	6	8.844e-08	2.1995e-07	0.000619	6	4	-4.2363	0.074455	0.075186	0.999017	1669	1	-4.2363
NonTargetingControlGuideForMouse_0724	2	0.98694	0.98688	0.999991	22173	0	-1.7135	0.074461	0.074346	0.999017	1670	0	-1.7135
Mesdc1	5	0.99281	0.9928	0.999991	22334	0	-6.4824	0.074498	0.074626	0.999017	1671	1	-6.4824
Grp	6	0.51137	0.73991	0.999991	16058	2	-3.6958	0.074502	0.075219	0.999017	1672	1	-3.6958
Tpbg	6	0.26803	0.52462	0.999991	11199	3	-6.4399	0.074548	0.075267	0.999017	1673	1	-6.4399
Cacng7	5	0.23846	0.46601	0.999991	10364	3	-7.8945	0.074575	0.074704	0.999017	1674	1	-7.8945
Mrpl11	6	0.23238	0.47844	0.999991	10205	3	-7.19	0.074595	0.075311	0.999017	1675	1	-7.19
Gpsm3	6	0.16918	0.39127	0.999991	8355	3	-7.7652	0.074688	0.075419	0.999017	1676	1	-7.7652
Il22ra2	6	0.04958	0.1617	0.999991	3429	2	-5.4281	0.074734	0.075468	0.999017	1677	1	-5.4281
Psmd5	6	0.17481	0.39923	0.999991	8519	2	-4.849	0.07478	0.075513	0.999017	1678	1	-4.849
Mag	6	0.31562	0.58346	0.999991	12423	1	-4.3258	0.074827	0.075561	0.999017	1679	1	-4.3258
Ldlrad3	6	0.62015	0.81801	0.999991	17700	3	-5.8545	0.074873	0.075604	0.999017	1680	1	-5.8545
NonTargetingControlGuideForMouse_0312	2	0.50446	0.54616	0.999991	15952	1	-4.4635	0.07489	0.07478	0.999017	1681	0	-4.4635
Rps6ka2	6	0.0089104	0.040448	0.962693	883	2	-3.9137	0.07492	0.07565	0.999017	1682	1	-3.9137
Slc9a9	6	0.17838	0.40437	0.999991	8629	3	-7.1778	0.075013	0.075734	0.999017	1683	1	-7.1778
Mup11	2	0.14177	0.2335	0.999991	7483	1	-4.6713	0.075017	0.074911	0.999017	1684	0	-4.6713
Oosp1	5	0.26203	0.4908	0.999991	11039	2	-6.1367	0.075041	0.075168	0.999017	1685	1	-6.1367
Rbm33	6	0.15807	0.37521	0.999991	7989	4	-7.8314	0.075059	0.075778	0.999017	1686	1	-7.8314
Tmem186	6	0.57983	0.78932	0.999991	17070	2	-6.5656	0.075105	0.075824	0.999017	1687	1	-6.5656
Olfr1157	6	0.13728	0.34449	0.999991	7315	3	-7.3975	0.075152	0.075871	0.999017	1688	1	-7.3975
Olfr744	5	0.50215	0.72454	0.999991	15925	1	-1.904	0.075157	0.07528	0.999017	1689	1	-1.904
Olfr395	5	0.43082	0.65929	0.999991	14667	3	-7.4792	0.075196	0.075315	0.999017	1690	1	-7.4792
Myrip	6	0.066355	0.20365	0.999991	4346	4	-8.1721	0.075198	0.075918	0.999017	1691	1	-8.1721
Clca2	5	0.99481	0.9948	0.999991	22381	0	-2.5548	0.075235	0.075354	0.999017	1692	1	-2.5548
Gm4340	3	0.95358	0.95386	0.999991	21531	0	-5.4986	0.075311	0.07524	0.999017	1693	0	-5.4986
Olfr679	6	0.20971	0.44804	0.999991	9543	2	-3.6718	0.075338	0.076044	0.999017	1694	1	-3.6718
Gpr22	5	0.076437	0.20874	0.999991	4841	2	-4.9309	0.075468	0.075574	0.999017	1695	1	-4.9309
Mbd3l1	6	0.017486	0.072651	0.980548	1561	2	-2.0075	0.075477	0.076168	0.999017	1696	1	-2.0075
Galnt13	5	0.76204	0.86872	0.999991	19391	1	-7.2188	0.075506	0.07561	0.999017	1697	1	-7.2188
Lamtor4	6	0.32866	0.59897	0.999991	12744	3	-7.2312	0.075523	0.076213	0.999017	1698	1	-7.2312
4933416C03Rik	6	0.20453	0.44088	0.999991	9393	3	-7.1817	0.07557	0.076259	0.999017	1699	1	-7.1817
Zfand5	5	0.91084	0.93235	0.999991	21077	1	-5.2924	0.075584	0.075686	0.999017	1700	1	-5.2924
Ttll7	6	0.77302	0.88995	0.999991	19520	1	-4.0181	0.075616	0.07631	0.999017	1701	1	-4.0181
Dzip3	4	0.26717	0.47599	0.999991	11183	3	-7.4838	0.075786	0.075669	0.999017	1702	0	-7.4838
Fzd9	6	0.81503	0.90905	0.999991	20060	2	-6.2628	0.075802	0.07649	0.999017	1703	1	-6.2628
Vmn1r135	1	0.92415	0.92448	0.999991	21199	0	-2.3408	0.075852	0.075794	0.999017	1704	0	-2.3408
Ms4a2	6	0.20421	0.44041	0.999991	9387	4	-7.8896	0.075894	0.076582	0.999017	1705	1	-7.8896
Cope	5	0.019684	0.073322	0.980548	1699	3	-8.386	0.07601	0.076117	0.999017	1706	1	-8.386
Galnt16	6	0.20799	0.44565	0.999991	9487	3	-6.6863	0.076034	0.076719	0.999017	1707	1	-6.6863
Stx17	6	0.65243	0.8407	0.999991	18165	2	-6.9508	0.076126	0.076805	0.999017	1708	1	-6.9508
Clec4e	6	0.044037	0.14731	0.999991	3160	2	-5.3446	0.076173	0.076848	0.999017	1709	1	-5.3446
Wdr54	6	0.95088	0.96466	0.999991	21494	1	-3.0161	0.076219	0.076892	0.999017	1710	1	-3.0161
Tram1	6	0.38595	0.64793	0.999991	13857	2	-6.2766	0.076266	0.076938	0.999017	1711	1	-6.2766
Olfr867	6	0.10242	0.2867	0.999991	6061	4	-8.1638	0.076405	0.077061	0.999017	1712	1	-8.1638
Gabra2	6	0.053447	0.17155	0.999991	3638	3	-4.5479	0.076497	0.077141	0.999017	1713	1	-4.5479
Aff3	6	0.37268	0.63806	0.999991	13635	2	-6.8221	0.076544	0.07718	0.999017	1714	1	-6.8221
5830418K08Rik	6	0.14399	0.35454	0.999991	7561	4	-7.8702	0.076683	0.07732	0.999017	1715	1	-7.8702
Rab27b	6	0.97339	0.9756	0.999991	21865	1	-2.476	0.076729	0.077367	0.999017	1716	1	-2.476
Epgn	6	0.27646	0.53527	0.999991	11431	4	-6.6631	0.076776	0.077413	0.999017	1717	1	-6.6631
Msra	6	0.054772	0.17495	0.999991	3720	3	-4.3572	0.076868	0.077502	0.999017	1718	1	-4.3572
Zfp74	4	0.74899	0.83351	0.999991	19248	1	-3.6068	0.076907	0.076726	0.999017	1719	0	-3.6068
Zfp143	6	0.41783	0.67162	0.999991	14421	2	-6.1243	0.076961	0.077592	0.999017	1720	1	-6.1243
Zfp616	6	0.87307	0.93859	0.999991	20703	2	-6.492	0.077054	0.07768	0.999017	1721	1	-6.492
Bpifb2	6	0.81349	0.90833	0.999991	20045	2	-5.2649	0.077146	0.077769	0.999017	1722	1	-5.2649
Sash3	6	0.26091	0.51555	0.999991	11004	4	-7.7278	0.077193	0.077814	0.999017	1723	1	-7.7278
Fuom	5	0.0063171	0.025914	0.915681	668	4	-8.6547	0.077211	0.0773	0.999017	1724	1	-8.6547
Ly6c2	3	0.49518	0.64996	0.999991	15818	2	-7.3472	0.077214	0.077149	0.999017	1725	0	-7.3472
Ralgapa2	4	0.51994	0.68441	0.999991	16199	1	-5.2712	0.077218	0.077052	0.999017	1726	0	-5.2712
Zdhhc3	6	0.095568	0.27162	0.999991	5741	4	-6.1442	0.077239	0.07785	0.999017	1727	1	-6.1442
Dennd1c	6	0.86653	0.93506	0.999991	20603	2	-7.2758	0.077285	0.077891	0.999017	1728	1	-7.2758
Vmn2r34	3	0.91084	0.91093	0.999991	21076	0	-3.1728	0.077308	0.077242	0.999017	1729	0	-3.1728
Bhlhe23	6	0.046095	0.15274	0.999991	3262	5	-7.739	0.077378	0.078002	0.999017	1730	1	-7.739
Vstm2b	5	0.033946	0.11656	0.995842	2597	2	-5.265	0.077405	0.077497	0.999017	1731	1	-5.265
Bbx	6	0.5197	0.746	0.999991	16192	3	-5.3625	0.077424	0.078049	0.999017	1732	1	-5.3625
5730409E04Rik	5	0.37663	0.6071	0.999991	13713	2	-6.7458	0.077444	0.077539	0.999017	1733	1	-6.7458
Hist1h2bj	4	0.60138	0.74615	0.999991	17409	2	-6.5394	0.077466	0.077295	0.999017	1734	0	-6.5394
Tcp10a	6	0.098749	0.27867	0.999991	5889	5	-6.294	0.077471	0.078092	0.999017	1735	1	-6.294
Zbtb25	5	0.025239	0.091496	0.995842	2033	1	-7.218	0.077482	0.077579	0.999017	1736	1	-7.218
Ctsr	6	0.054464	0.17416	0.999991	3697	2	-6.0165	0.077517	0.078137	0.999017	1737	1	-6.0165
Fuz	5	0.14626	0.34112	0.999991	7629	3	-8.129	0.077598	0.077695	0.999017	1738	1	-8.129
Sfrp4	6	0.34159	0.61414	0.999991	13045	4	-7.3943	0.07761	0.078232	0.999017	1739	1	-7.3943
mmu-mir-3059	3	0.92098	0.92106	0.999991	21160	0	-2.7061	0.077613	0.077536	0.999017	1740	0	-2.7061
4933425L06Rik	6	0.14955	0.3627	0.999991	7734	3	-4.8042	0.077656	0.078277	0.999017	1741	1	-4.8042
Mvb12a	6	0.96656	0.97171	0.999991	21736	1	-6.8437	0.077702	0.078321	0.999017	1742	1	-6.8437
Sit1	6	0.4023	0.66009	0.999991	14149	3	-7.3472	0.077795	0.078408	0.999017	1743	1	-7.3472
Sin3b	5	0.15697	0.35992	0.999991	7958	2	-4.9434	0.077908	0.078015	0.999017	1744	1	-4.9434
Dennd4a	6	0.010624	0.047488	0.979113	1019	4	-8.5534	0.07798	0.078574	0.999017	1745	1	-8.5534
Lactbl1	6	0.30967	0.57629	0.999991	12276	3	-7.3423	0.078073	0.078659	0.999017	1746	1	-7.3423
Zfp455	4	0.98523	0.98521	0.999991	22122	0	-4.9493	0.078088	0.077939	0.999017	1747	0	-4.9493
NonTargetingControlGuideForMouse_0196	2	0.72801	0.7282	0.999991	19006	1	-4.2582	0.078128	0.078047	0.999017	1748	0	-4.2582
Slc2a9	6	0.61703	0.81588	0.999991	17650	2	-7.1048	0.078165	0.07875	0.999017	1749	1	-7.1048
Zranb3	6	0.96192	0.96942	0.999991	21641	1	-2.0708	0.078212	0.078796	0.999017	1750	1	-2.0708
Olfr703	6	0.37062	0.63656	0.999991	13584	3	-5.5255	0.078304	0.07889	0.999017	1751	1	-5.5255
4930578I06Rik	4	0.11208	0.25565	0.999991	6462	2	-4.3781	0.078368	0.07822	0.999017	1752	0	-4.3781
Akap1	5	0.48337	0.70822	0.999991	15622	2	-5.7808	0.078411	0.078495	0.999017	1753	1	-5.7808
Gm20765	6	0.00076777	0.0039752	0.651208	115	4	-1.9767	0.078443	0.07903	0.999017	1754	1	-1.9767
Hhip	6	0.5329	0.75554	0.999991	16387	3	-3.7614	0.07849	0.07907	0.999017	1755	1	-3.7614
Zfp617	6	0.46777	0.70817	0.999991	15297	2	-4.003	0.078536	0.079111	0.999017	1756	1	-4.003
Celf2	6	0.53449	0.75668	0.999991	16412	2	-7.0606	0.078628	0.079206	0.999017	1757	1	-7.0606
Creb3l4	5	0.86512	0.9158	0.999991	20583	1	-2.3195	0.078759	0.078819	0.999017	1758	1	-2.3195
Gm20736	6	0.12153	0.32051	0.999991	6799	2	-6.5716	0.078767	0.079335	0.999017	1759	1	-6.5716
Olfr196	6	0.59721	0.8018	0.999991	17342	2	-1.467	0.07886	0.079422	0.999017	1760	1	-1.467
Tmem168	6	0.2327	0.47887	0.999991	10212	4	-7.8311	0.078906	0.079461	0.999017	1761	1	-7.8311
Sertad4	6	0.02265	0.088036	0.995842	1864	4	-8.1247	0.078952	0.079508	0.999017	1762	1	-8.1247
mmu-mir-6941	4	0.0095288	0.032208	0.935439	933	1	-4.7622	0.078958	0.078785	0.999017	1763	0	-4.7622
Syna	5	0.0098207	0.038976	0.962693	960	3	-8.8818	0.078991	0.079052	0.999017	1764	1	-8.8818
Clvs1	6	0.83022	0.91638	0.999991	20190	1	-6.311	0.078999	0.079555	0.999017	1765	1	-6.311
Foxo4	6	0.0089313	0.040523	0.962693	885	4	-6.8158	0.079045	0.079598	0.999017	1766	1	-6.8158
Cabs1	6	0.29011	0.55237	0.999991	11791	3	-7.3278	0.079091	0.079633	0.999017	1767	1	-7.3278
Olfr1040	6	0.37152	0.63722	0.999991	13606	2	-7.1633	0.079137	0.079678	0.999017	1768	1	-7.1633
Atp2b1	6	0.46818	0.70846	0.999991	15307	2	-5.4093	0.079184	0.079722	0.999017	1769	1	-5.4093
Mrgpre	5	0.32159	0.55229	0.999991	12573	3	-7.274	0.079262	0.079325	0.999017	1770	1	-7.274
Nox4	6	0.93254	0.95855	0.999991	21292	1	-6.4113	0.079276	0.079821	0.999017	1771	1	-6.4113
Prrg4	6	0.45277	0.69729	0.999991	15048	3	-7.063	0.079322	0.079862	0.999017	1772	1	-7.063
A630001G21Rik	6	0.29084	0.55328	0.999991	11803	3	-4.0851	0.079369	0.079897	0.999017	1773	1	-4.0851
Pcsk2	6	0.81624	0.90964	0.999991	20069	2	-6.1654	0.079461	0.079981	0.999017	1774	1	-6.1654
Pdzd7	5	0.97263	0.97268	0.999991	21850	0	-6.568	0.079494	0.07957	0.999017	1775	1	-6.568
Zhx3	6	0.72685	0.8705	0.999991	18994	2	-5.2789	0.079507	0.080022	0.999017	1776	1	-5.2789
Shc1	6	0.09703	0.27488	0.999991	5813	3	-5.1364	0.079554	0.080069	0.999017	1777	1	-5.1364
Slc25a10	6	0.30729	0.57342	0.999991	12223	2	-3.1929	0.0796	0.080113	0.999017	1778	1	-3.1929
Klra21	6	0.076845	0.22871	0.999991	4869	3	-4.0989	0.079646	0.080154	0.999017	1779	1	-4.0989
Aif1	6	0.45439	0.69848	0.999991	15080	3	-6.8607	0.079692	0.0802	0.999017	1780	1	-6.8607
Sfta2	6	0.072036	0.21734	0.999991	4642	5	-7.7871	0.079739	0.080243	0.999017	1781	1	-7.7871
Rcn2	6	0.05535	0.17645	0.999991	3756	5	-7.8299	0.079831	0.080325	0.999017	1782	1	-7.8299
Ccl20	5	0.48088	0.70595	0.999991	15572	2	-4.5996	0.07988	0.079976	0.999017	1783	1	-4.5996
Cpa4	6	0.1049	0.2921	0.999991	6158	1	-7.0635	0.079924	0.080408	0.999017	1784	1	-7.0635
Pcbp4	5	0.48915	0.7135	0.999991	15717	3	-4.9863	0.079957	0.080055	0.999017	1785	1	-4.9863
Cox4i2	6	0.25025	0.50175	0.999991	10723	3	-6.3587	0.080016	0.080487	0.999017	1786	1	-6.3587
NonTargetingControlGuideForMouse_0775	2	0.87785	0.87796	0.999991	20764	0	-3.7163	0.080062	0.079966	0.999017	1787	0	-3.7163
Ccdc104	6	0.043993	0.1472	0.999991	3156	4	-6.9284	0.080108	0.080571	0.999017	1788	1	-6.9284
Cyp2e1	6	0.053133	0.17076	0.999991	3616	4	-7.6499	0.080155	0.080616	0.999017	1789	1	-7.6499
Gadd45a	5	0.98369	0.98376	0.999991	22084	0	-0.70864	0.080189	0.080278	0.999017	1790	1	-0.70864
Olfr446	6	0.53537	0.75732	0.999991	16421	3	-7.0841	0.080201	0.080662	0.999017	1791	1	-7.0841
mmu-mir-7013	4	0.16346	0.33297	0.999991	8138	2	-7.5529	0.080231	0.08009	0.999017	1792	0	-7.5529
Nfatc3	6	0.073549	0.22093	0.999991	4710	2	-4.6105	0.080247	0.080703	0.999017	1793	1	-4.6105
Upk3bl	6	0.23894	0.48698	0.999991	10374	3	-7.4208	0.080293	0.080742	0.999017	1794	1	-7.4208
Zfp160	6	0.7131	0.86497	0.999991	18824	2	-4.8631	0.080339	0.080786	0.999017	1795	1	-4.8631
NonTargetingControlGuideForMouse_0385	2	0.58449	0.60556	0.999991	17139	1	-4.241	0.08041	0.080314	0.999017	1796	0	-4.241
Gbp4	5	0.57019	0.75939	0.999991	16942	2	-5.5451	0.080421	0.080514	0.999017	1797	1	-5.5451
Zfp3	6	0.39828	0.65711	0.999991	14074	2	-6.3243	0.080432	0.080886	0.999017	1798	1	-6.3243
Vmn1r73	6	0.03959	0.1356	0.998679	2898	4	-7.8468	0.080524	0.080975	0.999017	1799	1	-7.8468
Spaca5	6	0.074679	0.22364	0.999991	4771	2	-6.1763	0.08057	0.081015	0.999017	1800	1	-6.1763
mmu-mir-8099-2	4	0.66693	0.79733	0.999991	18349	2	-7.1439	0.080634	0.080485	0.999017	1801	0	-7.1439
Gtf2h2	5	0.39557	0.62565	0.999991	14034	3	-7.5549	0.08073	0.080818	0.999017	1802	1	-7.5549
Il7	6	0.98579	0.98575	0.999991	22143	0	-5.0524	0.080801	0.081233	0.999017	1803	1	-5.0524
Hs3st1	5	0.25373	0.48208	0.999991	10828	3	-7.8609	0.080845	0.080935	0.999017	1804	1	-7.8609
Sept8	6	0.30934	0.57592	0.999991	12271	4	-6.529	0.080848	0.08128	0.999017	1805	1	-6.529
Frrs1	5	0.56245	0.75541	0.999991	16819	2	-7.1882	0.080884	0.080973	0.999017	1806	1	-7.1882
Gpm6b	6	0.97219	0.97486	0.999991	21838	1	-5.3094	0.080894	0.081337	0.999017	1807	1	-5.3094
Gstcd	6	0.10245	0.28676	0.999991	6062	2	-6.5069	0.08094	0.081383	0.999017	1808	1	-6.5069
Pip5k1a	5	0.44994	0.67723	0.999991	14990	2	-5.9702	0.080961	0.081059	0.999017	1809	1	-5.9702
Tshz3	6	0.3849	0.64716	0.999991	13829	3	-7.3207	0.081032	0.081472	0.999017	1810	1	-7.3207
Ccdc38	6	0.338	0.60995	0.999991	12970	3	-6.9476	0.081079	0.081523	0.999017	1811	1	-6.9476
Ano2	6	0.27646	0.53527	0.999991	11430	4	-7.6976	0.081125	0.081576	0.999017	1812	1	-7.6976
Tbc1d24	6	0.84612	0.92442	0.999991	20358	1	-5.4551	0.081171	0.08162	0.999017	1813	1	-5.4551
Olfr670	6	0.87634	0.94041	0.999991	20740	1	-5.0256	0.081217	0.081661	0.999017	1814	1	-5.0256
Bcat1	5	0.39832	0.62832	0.999991	14080	3	-7.5489	0.081231	0.081339	0.999017	1815	1	-7.5489
Zfp385a	6	0.60068	0.80425	0.999991	17398	3	-4.7962	0.081309	0.081744	0.999017	1816	1	-4.7962
Mier3	5	0.044024	0.13945	0.998679	3159	4	-8.5329	0.081347	0.08145	0.999017	1817	1	-8.5329
Krt7	6	0.060745	0.18999	0.999991	4022	3	-6.7285	0.081402	0.081839	0.999017	1818	1	-6.7285
Olfr988	6	0.18844	0.41852	0.999991	8928	3	-7.5653	0.081448	0.081885	0.999017	1819	1	-7.5653
Olfr291	6	0.033067	0.11781	0.995842	2545	4	-7.375	0.081494	0.081933	0.999017	1820	1	-7.375
Pemt	5	0.53624	0.74183	0.999991	16439	1	-0.73191	0.08154	0.081647	0.999017	1821	1	-0.73191
NonTargetingControlGuideForMouse_0965	2	0.97844	0.97843	0.999991	21953	0	-2.7849	0.081566	0.081449	0.999017	1822	0	-2.7849
Lsamp	6	0.20698	0.44424	0.999991	9458	3	-7.5628	0.081586	0.082022	0.999017	1823	1	-7.5628
5730508B09Rik	6	0.75234	0.881	0.999991	19283	2	-4.7651	0.081679	0.082108	0.999017	1824	1	-4.7651
Pih1d1	6	0.28209	0.54232	0.999991	11581	3	-6.4592	0.081725	0.082154	0.999017	1825	1	-6.4592
Alad	5	0.37655	0.60702	0.999991	13711	3	-7.5941	0.081848	0.081946	0.999017	1826	1	-7.5941
Nxph4	6	0.77386	0.89031	0.999991	19535	2	-5.8612	0.081863	0.082307	0.999017	1827	1	-5.8612
Met	6	0.030148	0.10959	0.995842	2366	5	-8.2026	0.081909	0.082358	0.999017	1828	1	-8.2026
Pcdhb3	5	0.15117	0.34981	0.999991	7788	4	-7.5786	0.081926	0.082028	0.999017	1829	1	-7.5786
Gpr174	6	0.39182	0.65233	0.999991	13964	3	-7.3687	0.081956	0.082404	0.999017	1830	1	-7.3687
Foxq1	5	0.46068	0.6872	0.999991	15177	3	-7.4167	0.082041	0.082144	0.999017	1831	1	-7.4167
Ubac1	6	0.94449	0.96231	0.999991	21417	1	-4.1514	0.082048	0.0825	0.999017	1832	1	-4.1514
Speer3	5	0.66475	0.81088	0.999991	18323	2	-6.1444	0.08208	0.082184	0.999017	1833	1	-6.1444
Hemk1	6	0.20488	0.44133	0.999991	9404	4	-7.8602	0.08214	0.082586	0.999017	1834	1	-7.8602
mmu-mir-804	4	0.77911	0.84464	0.999991	19590	1	-4.3871	0.082246	0.082147	0.999017	1835	0	-4.3871
Csn1s1	2	0.015981	0.03	0.928673	1441	1	-5.1768	0.08231	0.08221	0.999017	1836	0	-5.1768
Lmo2	6	0.62525	0.82162	0.999991	17757	3	-3.383	0.082325	0.082764	0.999017	1837	1	-3.383
Gm14137	6	0.29705	0.56092	0.999991	11959	3	-4.8032	0.082371	0.082811	0.999017	1838	1	-4.8032
Ip6k3	5	0.31116	0.54178	0.999991	12310	2	-5.7832	0.082388	0.082494	0.999017	1839	1	-5.7832
Wasf3	6	0.8828	0.944	0.999991	20832	2	-4.3451	0.082463	0.082891	0.999017	1840	1	-4.3451
Ssbp3	5	0.78986	0.88655	0.999991	19744	2	-7.0751	0.082504	0.082622	0.999017	1841	1	-7.0751
Mctp1	6	0.61944	0.81754	0.999991	17685	2	-5.2896	0.082555	0.082983	0.999017	1842	1	-5.2896
Dpy19l1	6	0.11464	0.30986	0.999991	6545	2	-6.8069	0.082601	0.083027	0.999017	1843	1	-6.8069
NonTargetingControlGuideForMouse_0595	2	0.059689	0.10547	0.995842	3971	1	-5.1194	0.082611	0.0825	0.999017	1844	0	-5.1194
Cdh18	6	0.21508	0.45539	0.999991	9697	3	-4.6768	0.082648	0.083069	0.999017	1845	1	-4.6768
Atrip	6	0.7736	0.89021	0.999991	19530	2	-5.762	0.082694	0.083127	0.999017	1846	1	-5.762
Lce1b	4	0.34256	0.555	0.999991	13075	2	-7.4078	0.08271	0.082599	0.999017	1847	0	-7.4078
Tex14	5	0.87339	0.91841	0.999991	20707	1	-6.9342	0.082735	0.082862	0.999017	1848	1	-6.9342
Llgl2	6	0.51204	0.74041	0.999991	16072	3	-6.4228	0.082832	0.083268	0.999017	1849	1	-6.4228
NonTargetingControlGuideForMouse_0419	2	0.56952	0.59411	0.999991	16930	1	-4.3735	0.082864	0.082769	0.999017	1850	0	-4.3735
Slc35c1	6	0.87584	0.94012	0.999991	20734	2	-4.7457	0.082878	0.083313	0.999017	1851	1	-4.7457
Tas2r126	6	0.18673	0.41612	0.999991	8889	3	-6.9688	0.082924	0.083363	0.999017	1852	1	-6.9688
Sdc4	6	0.15057	0.36424	0.999991	7769	4	-7.9935	0.08297	0.083412	0.999017	1853	1	-7.9935
Usp24	6	0.15795	0.37503	0.999991	7985	4	-7.5794	0.083109	0.083543	0.999017	1854	1	-7.5794
NonTargetingControlGuideForMouse_0760	1	0.91688	0.91727	0.999991	21128	0	-2.3575	0.083123	0.08306	0.999017	1855	0	-2.3575
mmu-mir-467g	1	0.91686	0.91725	0.999991	21127	0	-2.2773	0.08314	0.083072	0.999017	1856	0	-2.2773
Ikbkg	6	0.53411	0.7564	0.999991	16405	1	-6.5751	0.083155	0.083588	0.999017	1857	1	-6.5751
Akr1b8	6	0.38389	0.64638	0.999991	13810	2	-2.4702	0.083247	0.08368	0.999017	1858	1	-2.4702
Etnppl	6	0.48205	0.7186	0.999991	15597	3	-7.2329	0.083293	0.083721	0.999017	1859	1	-7.2329
Gkap1	6	0.34034	0.61269	0.999991	13012	3	-6.7459	0.083339	0.083767	0.999017	1860	1	-6.7459
Pclo	5	0.73376	0.85121	0.999991	19069	2	-2.2918	0.08339	0.083529	0.999017	1861	1	-2.2918
mmu-mir-710	4	0.69224	0.81495	0.999991	18605	1	-6.023	0.083407	0.083298	0.999017	1862	0	-6.023
Lpcat4	6	0.15778	0.37477	0.999991	7977	3	-4.816	0.083523	0.083945	0.999017	1863	1	-4.816
Gpn3	6	0.63128	0.82586	0.999991	17842	2	-6.1358	0.083569	0.083991	0.999017	1864	1	-6.1358
Paqr4	5	0.034713	0.11833	0.995842	2631	4	-8.1213	0.08366	0.083807	0.999017	1865	1	-8.1213
Gm8909	6	0.96735	0.97213	0.999991	21743	1	-5.6182	0.083662	0.084079	0.999017	1866	1	-5.6182
Rps3a1	6	0.15011	0.36352	0.999991	7752	3	-6.5643	0.083708	0.084125	0.999017	1867	1	-6.5643
Mylpf	5	0.51146	0.72924	0.999991	16059	2	-6.7348	0.083737	0.083884	0.999017	1868	1	-6.7348
NonTargetingControlGuideForMouse_0168	2	0.038526	0.069778	0.979113	2829	1	-5.1433	0.083828	0.083705	0.999017	1869	0	-5.1433
NonTargetingControlGuideForMouse_0700	2	0.61378	0.62851	0.999991	17609	1	-4.242	0.083828	0.083705	0.999017	1870	0	-4.242
NonTargetingControlGuideForMouse_0422	2	0.8049	0.80449	0.999991	19928	0	-3.8814	0.083828	0.083705	0.999017	1871	0	-3.8814
NonTargetingControlGuideForMouse_0131	2	0.30689	0.41752	0.999991	12210	1	-4.6363	0.083828	0.083705	0.999017	1872	0	-4.6363
Gnat2	6	0.3542	0.62442	0.999991	13297	3	-7.0575	0.083846	0.084271	0.999017	1873	1	-7.0575
Frem1	6	0.98878	0.98873	0.999991	22222	0	-5.0731	0.083892	0.084319	0.999017	1874	1	-5.0731
Ripply3	6	0.011885	0.052497	0.979113	1110	5	-7.9424	0.083938	0.084359	0.999017	1875	1	-7.9424
Fhit	5	0.63664	0.79519	0.999991	17922	1	-3.9826	0.083968	0.084098	0.999017	1876	1	-3.9826
Pdpn	6	0.096463	0.27363	0.999991	5783	2	-6.7816	0.08403	0.084458	0.999017	1877	1	-6.7816
Fcgr2b	6	0.14197	0.35152	0.999991	7493	3	-7.2948	0.084076	0.084493	0.999017	1878	1	-7.2948
Ltk	6	0.043273	0.14533	0.999991	3121	3	-7.3297	0.084122	0.084537	0.999017	1879	1	-7.3297
Tlk1	6	0.84106	0.92186	0.999991	20305	2	-4.8813	0.084168	0.084582	0.999017	1880	1	-4.8813
Slc2a12	6	0.31999	0.58872	0.999991	12528	3	-7.0575	0.084214	0.084629	0.999017	1881	1	-7.0575
Nfkbia	5	0.045188	0.14205	0.998922	3206	3	-6.1261	0.084237	0.084377	0.999017	1882	1	-6.1261
Zfp964	6	0.098578	0.2783	0.999991	5882	2	-6.4695	0.08426	0.084672	0.999017	1883	1	-6.4695
Tmem14a	6	0.24404	0.49368	0.999991	10530	3	-3.7741	0.084306	0.084717	0.999017	1884	1	-3.7741
Gm5072	6	0.45045	0.69564	0.999991	15008	3	-7.3679	0.084352	0.08477	0.999017	1885	1	-7.3679
Metrn	4	0.62882	0.76757	0.999991	17805	1	-6.4569	0.084474	0.084374	0.999017	1886	0	-6.4569
Plcb2	6	0.21236	0.45167	0.999991	9620	3	-7.6918	0.08449	0.084918	0.999017	1887	1	-7.6918
Lect1	4	0.4132	0.60594	0.999991	14335	2	-7.3314	0.084536	0.084433	0.999017	1888	0	-7.3314
Tmem232	6	0.22794	0.47253	0.999991	10061	4	-7.7808	0.084537	0.084965	0.999017	1889	1	-7.7808
Yipf1	5	0.97598	0.97604	0.999991	21910	0	-2.3469	0.084622	0.084758	0.999017	1890	1	-2.3469
Lmbr1	6	0.43543	0.68454	0.999991	14752	3	-7.2754	0.084629	0.085056	0.999017	1891	1	-7.2754
Isoc2a	5	0.16858	0.37971	0.999991	8328	3	-8.0678	0.08466	0.08479	0.999017	1892	1	-8.0678
Ccdc103	6	0.99996	0.99996	0.999991	22505	0	-1.1631	0.084675	0.085108	0.999017	1893	1	-1.1631
Bri3bp	6	0.34045	0.61282	0.999991	13015	3	-6.4756	0.084767	0.085206	0.999017	1894	1	-6.4756
Phyhd1	5	0.59728	0.77379	0.999991	17345	2	-6.8428	0.084891	0.085015	0.999017	1895	1	-6.8428
Il1rapl2	6	0.4164	0.67054	0.999991	14391	3	-7.1174	0.084905	0.085339	0.999017	1896	1	-7.1174
Cspg5	6	0.22326	0.46634	0.999991	9931	2	-4.0079	0.084951	0.085391	0.999017	1897	1	-4.0079
Gm13276	2	0.72136	0.72187	0.999991	18935	1	-2.0639	0.08499	0.084857	0.999017	1898	0	-2.0639
NonTargetingControlGuideForMouse_0104	2	0.028231	0.051839	0.979113	2228	1	-5.2003	0.08499	0.084857	0.999017	1899	0	-5.2003
NonTargetingControlGuideForMouse_0610	2	0.84495	0.84492	0.999991	20344	0	-3.7688	0.08499	0.084857	0.999017	1900	0	-3.7688
4930447A16Rik	6	0.11421	0.30922	0.999991	6532	3	-7.5187	0.084997	0.085432	0.999017	1901	1	-7.5187
Iqgap2	6	0.31068	0.57752	0.999991	12302	2	-6.9634	0.085043	0.085478	0.999017	1902	1	-6.9634
Arap3	5	0.14394	0.33706	0.999991	7558	4	-7.5945	0.085122	0.085242	0.999017	1903	1	-7.5945
Usp27x	6	0.30598	0.57182	0.999991	12186	1	-3.5747	0.085135	0.08557	0.999017	1904	1	-3.5747
Cdh19	6	0.47533	0.71372	0.999991	15472	3	-6.3078	0.085181	0.085612	0.999017	1905	1	-6.3078
Efs	6	0.12459	0.32515	0.999991	6916	3	-7.0794	0.085227	0.085656	0.999017	1906	1	-7.0794
Epha3	6	0.77774	0.89204	0.999991	19572	2	-6.9071	0.085273	0.085699	0.999017	1907	1	-6.9071
Bsnd	5	0.25067	0.47893	0.999991	10735	1	-5.5778	0.085314	0.085438	0.999017	1908	1	-5.5778
Slc6a12	6	0.88315	0.9442	0.999991	20837	2	-3.1325	0.085319	0.085747	0.999017	1909	1	-3.1325
Tmem87a	5	0.21877	0.44496	0.999991	9807	3	-7.4038	0.085352	0.085477	0.999017	1910	1	-7.4038
Cyp3a41a	5	0.013508	0.052066	0.979113	1243	3	-8.3747	0.085391	0.085519	0.999017	1911	1	-8.3747
Ino80e	6	0.24216	0.49125	0.999991	10483	4	-7.8133	0.085411	0.085837	0.999017	1912	1	-7.8133
Vmn1r104	4	0.86128	0.8821	0.999991	20527	1	-2.0811	0.085432	0.085317	0.999017	1913	0	-2.0811
Musk	6	0.073944	0.22187	0.999991	4730	2	-2.6616	0.085457	0.085878	0.999017	1914	1	-2.6616
NonTargetingControlGuideForMouse_0644	2	0.9344	0.93453	0.999991	21308	0	-3.3259	0.085472	0.085322	0.999017	1915	0	-3.3259
Kcnh8	6	0.54147	0.76166	0.999991	16515	2	-6.8009	0.085503	0.085928	0.999017	1916	1	-6.8009
Tbrg4	5	0.75781	0.86604	0.999991	19348	2	-7.0216	0.085506	0.085635	0.999017	1917	1	-7.0216
Lrch2	5	0.38004	0.61046	0.999991	13762	2	-1.8805	0.085545	0.085671	0.999017	1918	1	-1.8805
Tbpl1	6	0.0041299	0.019811	0.904495	463	4	-6.8008	0.085595	0.086009	0.999017	1919	1	-6.8008
Srpk2	6	0.24992	0.50133	0.999991	10706	3	-6.6776	0.085687	0.086093	0.999017	1920	1	-6.6776
AI467606	6	0.2919	0.55455	0.999991	11827	4	-7.4579	0.085733	0.086142	0.999017	1921	1	-7.4579
Scg5	5	0.0031217	0.013274	0.848888	376	3	-7.8503	0.085737	0.085864	0.999017	1922	1	-7.8503
Pam	6	0.060905	0.19041	0.999991	4030	4	-8.3352	0.085779	0.086188	0.999017	1923	1	-8.3352
Fgf9	5	0.36462	0.59531	0.999991	13468	3	-5.733	0.085814	0.085933	0.999017	1924	1	-5.733
Slc6a3	6	0.29239	0.55517	0.999991	11838	4	-7.6047	0.085825	0.086233	0.999017	1925	1	-7.6047
Tnrc6a	6	0.96271	0.96978	0.999991	21660	1	-5.2505	0.085917	0.086324	0.999017	1926	1	-5.2505
mmu-mir-7063	3	0.4957	0.65049	0.999991	15829	2	-4.8603	0.085946	0.085801	0.999017	1927	0	-4.8603
Slc27a5	6	0.40505	0.6621	0.999991	14201	3	-7.3771	0.085963	0.086372	0.999017	1928	1	-7.3771
Ltbr	5	0.38842	0.61863	0.999991	13900	2	-7.001	0.085967	0.08609	0.999017	1929	1	-7.001
Prps1	6	0.074192	0.22248	0.999991	4749	4	-5.0496	0.086009	0.086414	0.999017	1930	1	-5.0496
Spock2	6	0.86653	0.93506	0.999991	20601	2	-7.0389	0.086055	0.086458	0.999017	1931	1	-7.0389
Mmp27	6	0.021902	0.085833	0.995842	1824	5	-8.2581	0.086146	0.086547	0.999017	1932	1	-8.2581
9530002B09Rik	6	0.15369	0.36881	0.999991	7869	4	-7.8225	0.086192	0.086588	0.999017	1933	1	-7.8225
Nr2e3	5	0.41781	0.64703	0.999991	14419	2	-4.0253	0.086198	0.086322	0.999017	1934	1	-4.0253
NonTargetingControlGuideForMouse_0781	2	0.77227	0.77177	0.999991	19515	0	-4.0869	0.08623	0.086074	0.999017	1935	0	-4.0869
Ncstn	6	0.43956	0.68752	0.999991	14816	2	-6.6115	0.086284	0.086676	0.999017	1936	1	-6.6115
mmu-mir-142b	4	0.12208	0.27111	0.999991	6819	2	-7.5004	0.086327	0.086201	0.999017	1937	0	-7.5004
Rxfp1	5	0.11125	0.27731	0.999991	6429	2	-7.3235	0.086352	0.086471	0.999017	1938	1	-7.3235
mmu-mir-193b	4	0.97783	0.97782	0.999991	21938	0	-5.5159	0.086358	0.086231	0.999017	1939	0	-5.5159
Mtx3	6	0.48382	0.71991	0.999991	15634	2	-5.4357	0.086376	0.086761	0.999017	1940	1	-5.4357
Spns3	6	0.21329	0.45295	0.999991	9644	3	-7.4203	0.086514	0.086908	0.999017	1941	1	-7.4203
Ccdc106	4	0.93928	0.9392	0.999991	21358	0	-7.1693	0.086543	0.086417	0.999017	1942	0	-7.1693
Fnd3c2	5	0.99789	0.99791	0.999991	22452	0	-5.9906	0.086544	0.086667	0.999017	1943	1	-5.9906
Pcdh10	6	0.59448	0.79986	0.999991	17306	2	-3.3638	0.086652	0.087043	0.999017	1944	1	-3.3638
Scai	5	0.39474	0.62483	0.999991	14017	3	-7.5556	0.086659	0.08678	0.999017	1945	1	-7.5556
Serpinb9f	6	0.096869	0.27453	0.999991	5802	3	-7.5988	0.086698	0.087078	0.999017	1946	1	-7.5988
Slc35g3	6	0.088068	0.25459	0.999991	5412	3	-7.866	0.086744	0.087124	0.999017	1947	1	-7.866
Lgals3bp	5	0.14514	0.33917	0.999991	7598	3	-7.0336	0.086774	0.086899	0.999017	1948	1	-7.0336
Btc	6	0.60965	0.81063	0.999991	17532	2	-5.1603	0.08679	0.08716	0.999017	1949	1	-5.1603
Csrp1	5	0.58549	0.76743	0.999991	17159	2	-6.4901	0.086812	0.086935	0.999017	1950	1	-6.4901
mmu-mir-691	4	0.51761	0.68269	0.999991	16162	2	-5.7837	0.086821	0.086676	0.999017	1951	0	-5.7837
Gabrg1	6	0.63107	0.82571	0.999991	17839	3	-7.1302	0.086836	0.087206	0.999017	1952	1	-7.1302
Elavl1	5	0.9513	0.95438	0.999991	21502	1	-2.9579	0.086851	0.086969	0.999017	1953	1	-2.9579
Glyatl3	6	0.95166	0.96497	0.999991	21508	1	-5.7714	0.086882	0.087244	0.999017	1954	1	-5.7714
Rev3l	5	0.4795	0.70466	0.999991	15547	2	-6.5788	0.086966	0.087076	0.999017	1955	1	-6.5788
Mmp28	6	0.78633	0.89585	0.999991	19703	2	-4.7603	0.08702	0.087373	0.999017	1956	1	-4.7603
Agmat	5	0.73675	0.85305	0.999991	19106	2	-4.7417	0.087024	0.08714	0.999017	1957	1	-4.7417
Slc27a6	6	0.63684	0.82976	0.999991	17929	2	-5.8279	0.087065	0.087414	0.999017	1958	1	-5.8279
Ccdc107	4	0.33584	0.55013	0.999991	12911	2	-7.3524	0.087068	0.086939	0.999017	1959	0	-7.3524
Mob1a	5	0.22425	0.45088	0.999991	9961	3	-7.7699	0.087081	0.087201	0.999017	1960	1	-7.7699
Slc38a10	6	0.41276	0.66784	0.999991	14326	3	-3.3065	0.087111	0.087452	0.999017	1961	1	-3.3065
Wisp3	6	0.48736	0.72252	0.999991	15685	3	-6.5632	0.087157	0.087492	0.999017	1962	1	-6.5632
Enkur	6	0.64953	0.83869	0.999991	18122	1	-5.7226	0.087203	0.087543	0.999017	1963	1	-5.7226
Ttc36	4	0.53207	0.69344	0.999991	16369	2	-3.7664	0.087346	0.087219	0.999017	1964	0	-3.7664
1600014K23Rik	6	0.11144	0.30491	0.999991	6437	3	-7.6721	0.087433	0.087774	0.999017	1965	1	-7.6721
AA414768	6	0.02515	0.095303	0.995842	2023	3	-6.2272	0.087479	0.08782	0.999017	1966	1	-6.2272
Smu1	5	0.97993	0.98003	0.999991	21984	0	-4.9725	0.087503	0.08763	0.999017	1967	1	-4.9725
NonTargetingControlGuideForMouse_0189	1	0.9125	0.91281	0.999991	21094	0	-2.275	0.087504	0.087416	0.999017	1968	0	-2.275
Zfp512	6	0.73834	0.87519	0.999991	19119	2	-6.7274	0.087525	0.087864	0.999017	1969	1	-6.7274
Timp1	6	0.38117	0.64439	0.999991	13779	2	-7.1441	0.087616	0.087959	0.999017	1970	1	-7.1441
Styk1	4	0.27723	0.48912	0.999991	11451	2	-7.6477	0.087654	0.087508	0.999017	1971	0	-7.6477
mmu-mir-6994	4	0.3478	0.55874	0.999991	13179	1	-4.3611	0.087685	0.087538	0.999017	1972	0	-4.3611
Atad2b	6	0.61944	0.81754	0.999991	17686	3	-4.7507	0.087708	0.088048	0.999017	1973	1	-4.7507
Gm10142	5	0.090104	0.23642	0.999991	5502	4	-8.0326	0.087734	0.087851	0.999017	1974	1	-8.0326
Ccdc12	5	0.26278	0.49161	0.999991	11061	2	-4.0675	0.087772	0.087887	0.999017	1975	1	-4.0675
BC030307	6	0.33404	0.60532	0.999991	12883	2	-6.0057	0.0878	0.088136	0.999017	1976	1	-6.0057
Zfp385b	5	0.5569	0.75256	0.999991	16734	2	-3.9637	0.08781	0.087927	0.999017	1977	1	-3.9637
Gal3st3	6	0.48834	0.72324	0.999991	15705	2	-5.1041	0.087846	0.088183	0.999017	1978	1	-5.1041
Trmt10c	6	0.23065	0.47614	0.999991	10146	2	-5.202	0.087892	0.088226	0.999017	1979	1	-5.202
2700029M09Rik	6	0.84899	0.92587	0.999991	20396	1	-5.3349	0.087938	0.088277	0.999017	1980	1	-5.3349
Gm17455	6	0.39483	0.65459	0.999991	14020	3	-2.8014	0.087984	0.088329	0.999017	1981	1	-2.8014
Atp4a	6	0.064718	0.19969	0.999991	4245	3	-6.2856	0.088029	0.088379	0.999017	1982	1	-6.2856
Mpst	6	0.093099	0.26601	0.999991	5645	4	-6.7068	0.088075	0.088426	0.999017	1983	1	-6.7068
Cxcr5	5	0.83408	0.90695	0.999991	20238	1	-4.7813	0.088079	0.088211	0.999017	1984	1	-4.7813
Rpl29	5	0.97411	0.97416	0.999991	21878	0	-5.4291	0.088117	0.088246	0.999017	1985	1	-5.4291
Ccl5	6	0.46003	0.70256	0.999991	15166	3	-7.0061	0.088121	0.08847	0.999017	1986	1	-7.0061
Slc25a1	6	0.30558	0.57133	0.999991	12173	3	-5.7589	0.088213	0.088559	0.999017	1987	1	-5.7589
1700011E24Rik	6	0.91091	0.95282	0.999991	21079	1	-4.8836	0.088259	0.088605	0.999017	1988	1	-4.8836
Lrr1	5	0.94731	0.95168	0.999991	21461	1	-5.9201	0.088271	0.0884	0.999017	1989	1	-5.9201
Msrb3	6	0.12316	0.32299	0.999991	6860	3	-5.5768	0.088305	0.088645	0.999017	1990	1	-5.5768
Tm6sf1	6	0.071287	0.21557	0.999991	4608	2	-6.2822	0.088397	0.088741	0.999017	1991	1	-6.2822
Spata7	6	0.59808	0.80241	0.999991	17360	3	-3.8307	0.088442	0.088783	0.999017	1992	1	-3.8307
Grhpr	5	0.062287	0.17921	0.999991	4114	2	-5.2089	0.088462	0.088598	0.999017	1993	1	-5.2089
Entpd3	6	0.024227	0.092662	0.995842	1971	5	-8.2605	0.088534	0.088864	0.999017	1994	1	-8.2605
Dpysl5	6	0.99212	0.99208	0.999991	22310	0	-6.024	0.08858	0.088913	0.999017	1995	1	-6.024
Noa1	6	0.15546	0.3714	0.999991	7915	2	-5.6772	0.088626	0.08896	0.999017	1996	1	-5.6772
Zfp473	6	0.39968	0.65815	0.999991	14105	1	-3.4154	0.088901	0.089217	0.999017	1997	1	-3.4154
mmu-mir-6928	4	0.95497	0.95488	0.999991	21555	0	-4.671	0.088918	0.088793	0.999017	1998	0	-4.671
Pbld2	6	0.010437	0.046747	0.979113	1006	3	-7.0973	0.088947	0.089254	0.999017	1999	1	-7.0973
[truncated: 20,508 more rows]
